# Supplementary material for: Substituent-Controllable Cascade Regioselective Annulation of β-Enaminones with N-Sulfonyl Triazoles for Modular Access to Imidazoles and Pyrroles
Source: MDPI journal article supplement (doi:10.3390/molecules28114416), 2023-05-29

## *Supporting Information*

### **Substituent-controllable regioselective annulation of $\beta$ -enaminones with *N*-sulfonyl triazoles for modular access to imidazoles and pyrroles**

Hua Wang,<sup>1</sup> Tongtong Zhou,<sup>1</sup> Mengdi Wu,<sup>1</sup> Qingqing Ye,<sup>2,\*</sup> and Xinwei He,<sup>1,\*</sup>

<sup>1</sup> Key Laboratory of Functional Molecular Solids, Ministry of Education, Anhui Laboratory of Molecule-Based Materials (State Key Laboratory Cultivation Base), College of Chemistry and Materials Science, Anhui Normal University, Wuhu 241000, China

<sup>2</sup> Department of Medicine, Chuzhou City Vocation College, Chuzhou 239000, China

\*Corresponding authors: yeqingqing1983@sohu.com; xinweihe@mail.ahnu.edu.cn

#### **Table of contents**

|                                                            |     |
|------------------------------------------------------------|-----|
| 1. X-ray crystallographic data of compound <b>3a</b> ----- | S2  |
| 2. X-ray crystallographic data of compound <b>5a</b> ----- | S2  |
| 3. NMR spectra for all compounds-----                      | S3  |
| 4. GC-MS spectra for mechanistic investigations-----       | S56 |

## 1. X-ray crystallographic data of compound 3a

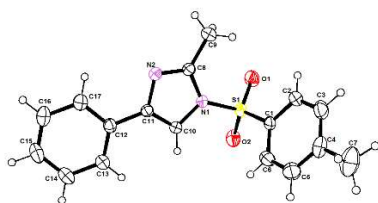

**Figure S1.** ORTEP drawing of compound **3a** (30% probability for the thermal ellipsoid).

The purified compound **3a** is dissolved in a mixed solvent of ethyl acetate and petroleum ether, and placed in a dark cabinet to slowly evaporate. After several days, a colourless bulk crystal was obtained. The X-ray crystal-structure determinations were obtained on a Bruker Smart CCD APEX-2 diffractometer (graphite- monochromated Mo  $K\alpha$  radiation,  $\lambda=0.71073$  nm) at 298 K.

**Table S1.** Crystal data and structure refinement for compound **3a**.

|                                      |                                                                                                                                    |
|--------------------------------------|------------------------------------------------------------------------------------------------------------------------------------|
| CCDC number                          | 2260879                                                                                                                            |
| Identification code                  | 20191014c                                                                                                                          |
| Empirical formula                    | C <sub>17</sub> H <sub>16</sub> N <sub>2</sub> O <sub>2</sub> S                                                                    |
| Formula weight                       | 312.38                                                                                                                             |
| Temperature                          | 298.15 K                                                                                                                           |
| Wavelength                           | 0.71073 Å                                                                                                                          |
| Crystal system                       | Monoclinic                                                                                                                         |
| Space group                          | P2 <sub>1</sub> /c                                                                                                                 |
| Unit cell dimensions                 | $a = 12.6175(5)$ Å $\alpha = 90^\circ$ .<br>$b = 12.5587(5)$ Å $\beta = 99.2860(10)$ .<br>$c = 10.4154(4)$ Å $\gamma = 90^\circ$ . |
| Volume                               | $1628.79(11)$ Å <sup>3</sup>                                                                                                       |
| Z                                    | 4                                                                                                                                  |
| Density (calculated)                 | $1.274$ g/cm <sup>3</sup>                                                                                                          |
| $\mu$                                | $0.207$ mm <sup>-1</sup>                                                                                                           |
| F(000)                               | 656.0                                                                                                                              |
| Crystal size                         | $0.21 \times 0.2 \times 0.19$ mm <sup>3</sup>                                                                                      |
| 2 $\theta$ range for data collection | $5.722$ to $55.072^\circ$                                                                                                          |
| Index ranges                         | $-16 \leq h \leq 16$ , $-16 \leq k \leq 16$ , $-13 \leq l \leq 13$                                                                 |
| Reflections collected                | 42190                                                                                                                              |
| Independent reflections              | 3738 [R(int) = 0.0258, R(sigma) = 0.0119]                                                                                          |
| Data / restraints / parameters       | 3738 / 0 / 201                                                                                                                     |
| Goodness-of-fit on F <sup>2</sup>    | 1.088                                                                                                                              |
| Final R indices [I>2sigma(I)]        | $R_1 = 0.0429$ , $wR_2 = 0.1112$                                                                                                   |
| Final R indices (all data)           | $R_1 = 0.0511$ , $wR_2 = 0.1204$                                                                                                   |
| Largest diff. peak and hole          | 0.21 and -0.43 eÅ <sup>-3</sup>                                                                                                    |

## 1. X-ray crystallographic data of compound 5a

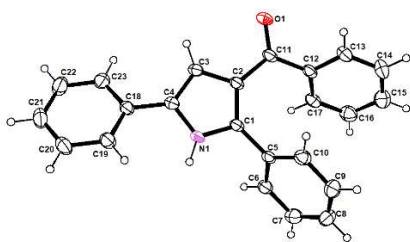

**Figure S2.** ORTEP drawing of compound **5a** (30% probability for the thermal

The purified compound **5a** is dissolved in a mixed solvent of ethyl acetate and petroleum ether, and placed in a dark cabinet to slowly evaporate. After several days, a colourless bulk crystal was obtained. The X-ray crystal-structure determinations were obtained on a Bruker Smart CCD APEX-2 diffractometer (graphite-monochromated Mo  $K\alpha$  radiation,  $\lambda=0.71073$  nm) at 298 K.

ellipsoid).

**Table S2.** Crystal data and structure refinement for compound **5a**.

|                                      |                                                                                                                                  |
|--------------------------------------|----------------------------------------------------------------------------------------------------------------------------------|
| CCDC number                          | 2260880                                                                                                                          |
| Identification code                  | mo_20200109b_0m_a                                                                                                                |
| Empirical formula                    | C <sub>23</sub> H <sub>17</sub> N O                                                                                              |
| Formula weight                       | 323.38                                                                                                                           |
| Temperature                          | 298.15 K                                                                                                                         |
| Wavelength                           | 0.71073 Å                                                                                                                        |
| Crystal system                       | Triclinic                                                                                                                        |
| Space group                          | P-1                                                                                                                              |
| Unit cell dimensions                 | a = 9.9209(10) Å $\alpha$ = 113.914(4)°.<br>b = 13.3600(16) Å $\beta$ = 91.364(4)°.<br>c = 14.6495(16) Å $\gamma$ = 102.145(5)°. |
| Volume                               | 1722.3(3) Å <sup>3</sup>                                                                                                         |
| Z                                    | 4                                                                                                                                |
| Density (calculated)                 | 1.247 g/cm <sup>3</sup>                                                                                                          |
| $\mu$                                | 0.076 mm <sup>-1</sup>                                                                                                           |
| F(000)                               | 680.0                                                                                                                            |
| Crystal size                         | 0.23 × 0.21 × 0.2 mm <sup>3</sup>                                                                                                |
| 2 $\theta$ range for data collection | 5.84 to 55.168°                                                                                                                  |
| Index ranges                         | -12 ≤ h ≤ 12, -17 ≤ k ≤ 17, -19 ≤ l ≤ 19                                                                                         |
| Reflections collected                | 68223                                                                                                                            |
| Independent reflections              | 7947 [R(int) = 0.0439, R(sigma) = 0.0241]                                                                                        |
| Data / restraints / parameters       | 7947 / 0 / 451                                                                                                                   |
| Goodness-of-fit on F <sup>2</sup>    | 1.046                                                                                                                            |
| Final R indices [I > 2sigma(I)]      | R <sub>1</sub> = 0.0547, wR <sub>2</sub> = 0.1552                                                                                |
| Final R indices (all data)           | R <sub>1</sub> = 0.0784, wR <sub>2</sub> = 0.1779                                                                                |
| Largest diff. peak and hole          | 0.26 and -0.29 eÅ <sup>-3</sup>                                                                                                  |

### 3. NMR spectra for all compounds

#### 2-Methyl-4-phenyl-1-tosyl-1H-imidazole (3a)

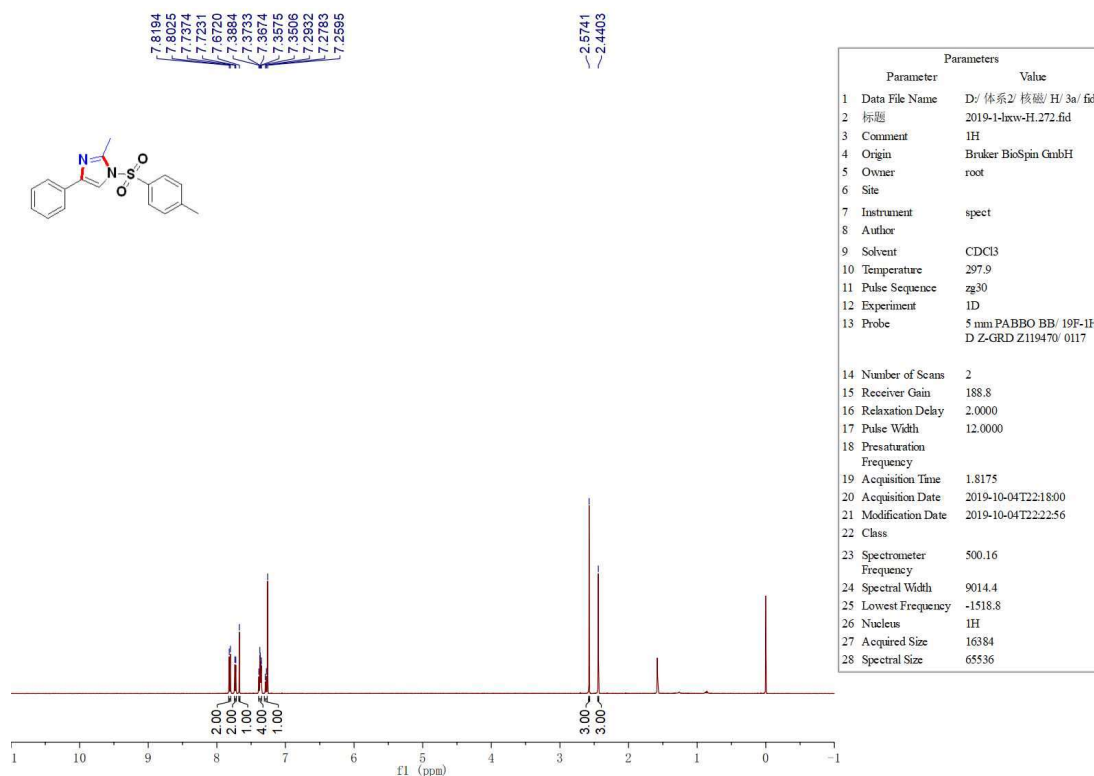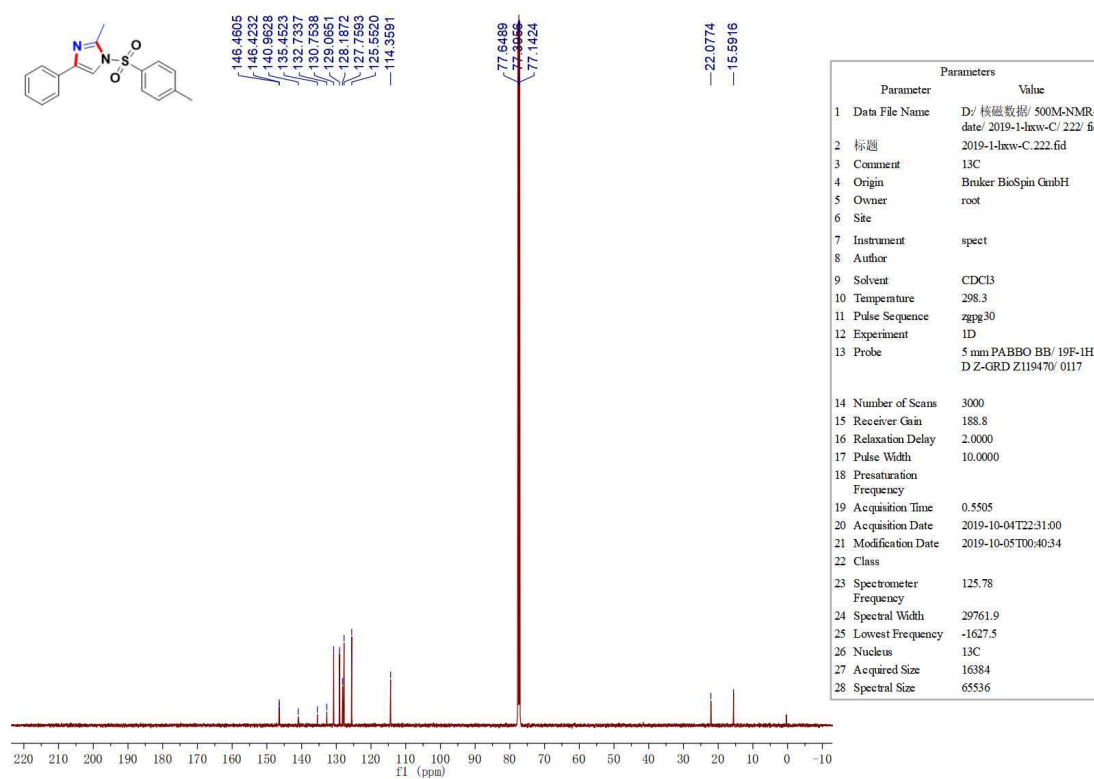



## 2-Methyl-4-(*p*-tolyl)-1-tosyl-1*H*-imidazole (3b)

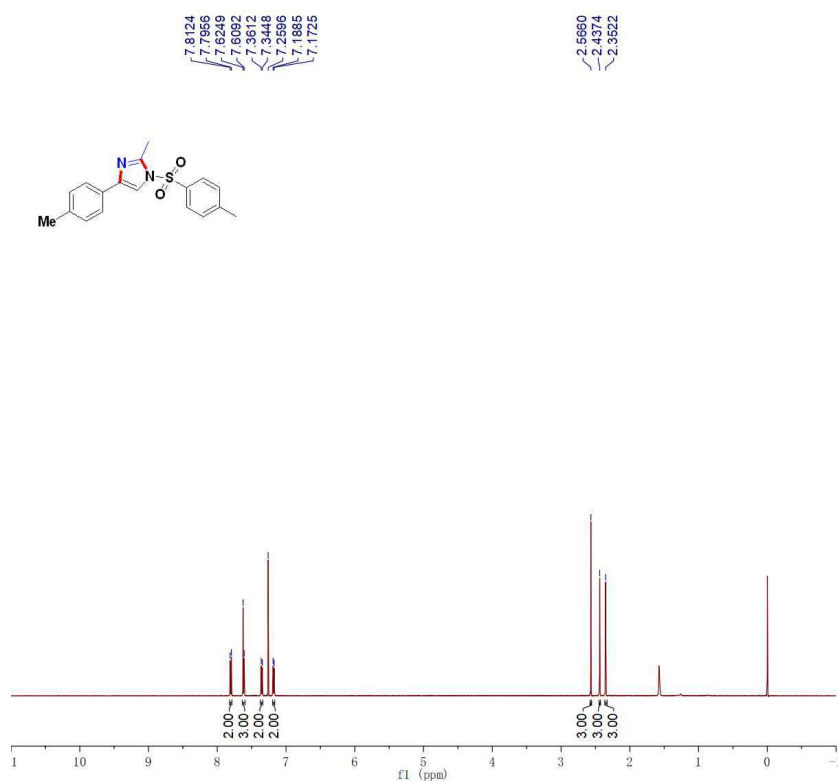

| Parameters                    |                                                    |
|-------------------------------|----------------------------------------------------|
| Parameter                     | Value                                              |
| 1 Data File Name              | D:/ 体系2/ 核磁/H/ 4-甲<br>基/ fid                       |
| 2 标题                          | 2019-1-lxxw-H.275.fid                              |
| 3 Comment                     | 1H                                                 |
| 4 Origin                      | Bruker BioSpin GmbH                                |
| 5 Owner                       | root                                               |
| 6 Site                        |                                                    |
| 7 Instrument                  | spect                                              |
| 8 Author                      |                                                    |
| 9 Solvent                     | CDCl <sub>3</sub>                                  |
| 10 Temperature                | 297.7                                              |
| 11 Pulse Sequence             | zg30                                               |
| 12 Experiment                 | 1D                                                 |
| 13 Probe                      | 5 mm PABBO BB/<br>19F-1H/ D Z-GRD<br>Z119470/ 0117 |
| 14 Number of Scans            | 2                                                  |
| 15 Receiver Gain              | 150.9                                              |
| 16 Relaxation Delay           | 2.0000                                             |
| 17 Pulse Width                | 12.0000                                            |
| 18 Presaturation<br>Frequency |                                                    |
| 19 Acquisition Time           | 1.8175                                             |
| 20 Acquisition Date           | 2019-10-10T11:17:00                                |
| 21 Modification Date          | 2019-10-10T11:17:38                                |
| 22 Class                      |                                                    |
| 23 Spectrometer<br>Frequency  | 500.16                                             |
| 24 Spectral Width             | 9014.4                                             |
| 25 Lowest Frequency           | -1518.8                                            |
| 26 Nucleus                    | 1H                                                 |
| 27 Acquired Size              | 16384                                              |
| 28 Spectral Size              | 65536                                              |

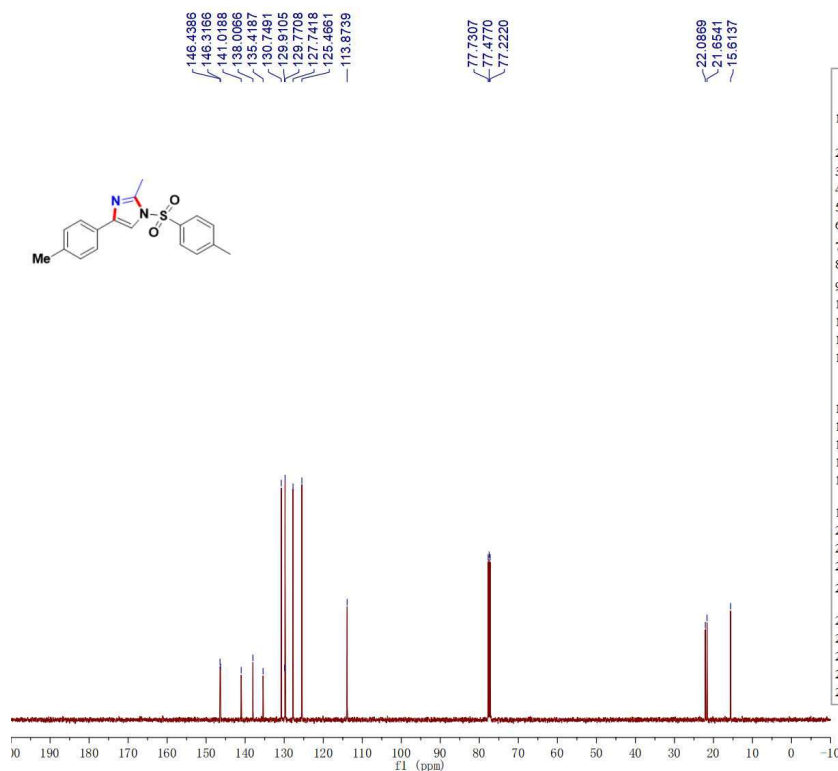

| Parameters                    |                                                      |
|-------------------------------|------------------------------------------------------|
| Parameter                     | Value                                                |
| 1 Data File Name              | D:/ 核磁数据/ 500M-NMR-<br>date/ 2019-1-lxxw-C/ 227/ fid |
| 2 标题                          | 2019-1-lxxw-C.227.fid                                |
| 3 Comment                     | 13C                                                  |
| 4 Origin                      | Bruker BioSpin GmbH                                  |
| 5 Owner                       | root                                                 |
| 6 Site                        |                                                      |
| 7 Instrument                  | spect                                                |
| 8 Author                      |                                                      |
| 9 Solvent                     | CDCl <sub>3</sub>                                    |
| 10 Temperature                | 298.2                                                |
| 11 Pulse Sequence             | zgpg30                                               |
| 12 Experiment                 | 1D                                                   |
| 13 Probe                      | 5 mm PABBO BB/ 19F-1H/<br>D Z-GRD Z119470/ 0117      |
| 14 Number of Scans            | 40                                                   |
| 15 Receiver Gain              | 188.8                                                |
| 16 Relaxation Delay           | 2.0000                                               |
| 17 Pulse Width                | 10.0000                                              |
| 18 Presaturation<br>Frequency |                                                      |
| 19 Acquisition Time           | 0.5505                                               |
| 20 Acquisition Date           | 2019-10-10T22:36:00                                  |
| 21 Modification Date          | 2019-10-10T22:37:28                                  |
| 22 Class                      |                                                      |
| 23 Spectrometer<br>Frequency  | 125.78                                               |
| 24 Spectral Width             | 29761.9                                              |
| 25 Lowest Frequency           | -1627.5                                              |
| 26 Nucleus                    | 13C                                                  |
| 27 Acquired Size              | 16384                                                |
| 28 Spectral Size              | 65536                                                |

**Chemical Structure:** CCc1ccc(cc1)/C=N/N(S(=O)(=O)c2ccccc2)C=C

**<sup>1</sup>H NMR Data (CDCl<sub>3</sub>):**

| Chemical Shift (ppm) | Multiplicity | Integration |
|----------------------|--------------|-------------|
| ~7.8                 | d            | 2.00        |
| ~7.7                 | d            | 3.00        |
| ~7.4                 | m            | 2.00        |
| ~7.3                 | m            | 2.00        |
| ~2.6                 | s            | 3.00        |
| ~1.2                 | t            | 3.00        |

| Parameters |                             |                                                |
|------------|-----------------------------|------------------------------------------------|
|            | Parameter                   | Value                                          |
| 1          | Data File Name              | D:/体系2/核磁/H-4-乙基<br>fid                        |
| 2          | 标题                          | 2020-1-25y-H.16.fid                            |
| 3          | Comment                     | 1H ztt                                         |
| 4          | Owner                       | Bruker BioSpin GmbH                            |
| 5          | Origin                      | root                                           |
| 6          | Site                        |                                                |
| 7          | Instrument                  | spect                                          |
| 8          | Author                      |                                                |
| 9          | Solvent                     | CDCB                                           |
| 10         | Temperature                 | 294.6                                          |
| 11         | Pulse Sequence              | zg30                                           |
| 12         | Experiment                  | 1D                                             |
| 13         | Probe                       | Z119470_0117 (PA BBO<br>500S1 BBF-H-D-05 Z SP) |
| 14         | Number of Scans             | 2                                              |
| 15         | Receiver Gain               | 30.7                                           |
| 16         | Relaxation Delay            | 2.0000                                         |
| 17         | Pulse Width                 | 12.0000                                        |
| 18         | Prestaturation<br>Frequency |                                                |
| 19         | Acquisition Time            | 1.8175                                         |
| 20         | Acquisition Date            | 2019-12-30T11:00:05                            |
| 21         | Modification Date           | 2019-12-30T11:00:06                            |
| 22         | Class                       |                                                |
| 23         | Spectrometer<br>Frequency   | 500.16                                         |
| 24         | Spectral Width              | 9014.4                                         |
| 25         | Lowest Frequency            | -1519.4                                        |
| 26         | Nucleus                     | 1H                                             |
| 27         | Acquired Size               | 16384                                          |
| 28         | Spectral Size               | 65536                                          |

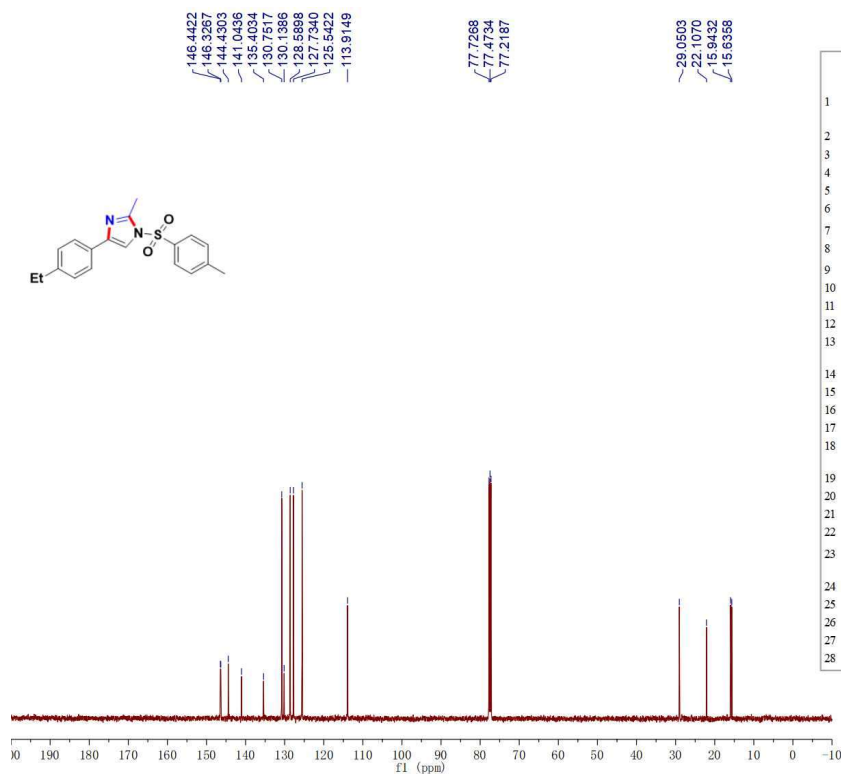

|    | Parameters               | Value                                       |
|----|--------------------------|---------------------------------------------|
| 1  | Data File Name           | D:\核磁数据\nmr\mmr\2020-1-syg-C\1.fid          |
| 2  | 标题                       | 2020-1-syg-C.1.fid                          |
| 3  | Comment                  | 13C                                         |
| 4  | Origin                   | Bruker BioSpin GmbH                         |
| 5  | Owner                    | root                                        |
| 6  | Site                     |                                             |
| 7  | Instrument               | spect                                       |
| 8  | Author                   |                                             |
| 9  | Solvent                  | CDCl3                                       |
| 10 | Temperature              | 295.3                                       |
| 11 | Pulse Sequence           | zgpg30                                      |
| 12 | Experiment               | 1D                                          |
| 13 | Probe                    | UI19470_0117 (PA BBO 500S1 BBF-H-D-05 Z SP) |
| 14 | Number of Scans          | 55                                          |
| 15 | Receiver Gain            | 188.8                                       |
| 16 | Relaxation Delay         | 2.0000                                      |
| 17 | Pulse Width              | 10.0000                                     |
| 18 | Prestaturation Frequency |                                             |
| 19 | Acquisition Time         | 0.5505                                      |
| 20 | Acquisition Date         | 2019-12-30T11:31:59                         |
| 21 | Modification Date        | 2019-12-30T11:32:02                         |
| 22 | Class                    |                                             |
| 23 | Spectrometer Frequency   | 125.78                                      |
| 24 | Spectral Width           | 29761.9                                     |
| 25 | Lowest Frequency         | -1627.5                                     |
| 26 | Nucleus                  | 13C                                         |
| 27 | Acquired Size            | 16384                                       |
| 28 | Spectral Size            | 65536                                       |

# 4-(4-Methoxyphenyl)-2-methyl-1-tosyl-1H-imidazole (3d)

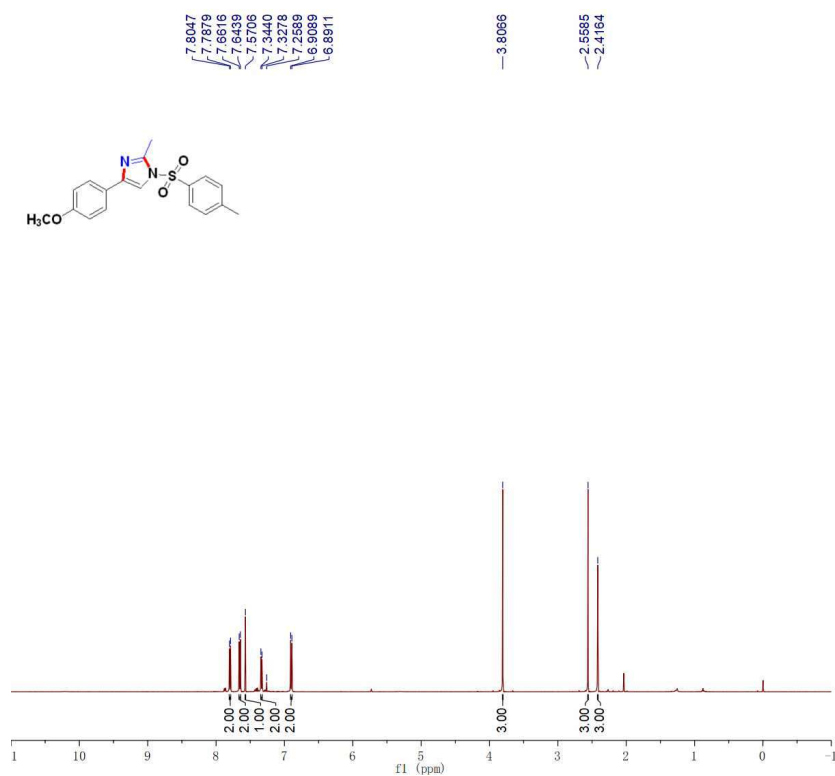

| Parameters                 |                                              |  |
|----------------------------|----------------------------------------------|--|
| Parameter                  | Value                                        |  |
| 1 Data File Name           | D:/ 体系2/ 核磁/ H/ 4-甲氧基/ fid                   |  |
| 2 标题                       | 2019-1-lxw-H.340.fid                         |  |
| 3 Comment                  | 1H                                           |  |
| 4 Origin                   | Bruker BioSpin GmbH                          |  |
| 5 Owner                    | root                                         |  |
| 6 Site                     |                                              |  |
| 7 Instrument               | spect                                        |  |
| 8 Author                   |                                              |  |
| 9 Solvent                  | CDCl <sub>3</sub>                            |  |
| 10 Temperature             | 295.9                                        |  |
| 11 Pulse Sequence          | zg30                                         |  |
| 12 Experiment              | 1D                                           |  |
| 13 Probe                   | 5 mm PABBO BB/ 19F-1H/ D Z-GRD Z119470/ 0117 |  |
| 14 Number of Scans         | 2                                            |  |
| 15 Receiver Gain           | 30.7                                         |  |
| 16 Relaxation Delay        | 2.0000                                       |  |
| 17 Pulse Width             | 12.0000                                      |  |
| 18 Presaturation Frequency |                                              |  |
| 19 Acquisition Time        | 1.8175                                       |  |
| 20 Acquisition Date        | 2019-12-10T12:42:00                          |  |
| 21 Modification Date       | 2019-12-10T12:42:30                          |  |
| 22 Class                   |                                              |  |
| 23 Spectrometer Frequency  | 500.16                                       |  |
| 24 Spectral Width          | 9014.4                                       |  |
| 25 Lowest Frequency        | -1518.8                                      |  |
| 26 Nucleus                 | 1H                                           |  |
| 27 Acquired Size           | 16384                                        |  |
| 28 Spectral Size           | 65536                                        |  |

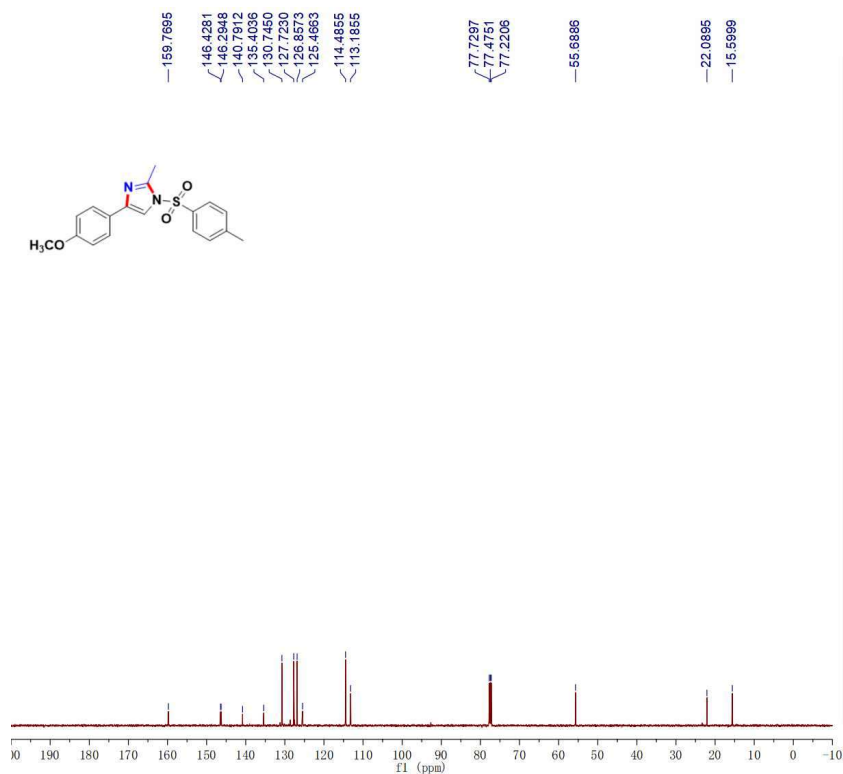

| Parameters                 |                                                 |  |
|----------------------------|-------------------------------------------------|--|
| Parameter                  | Value                                           |  |
| 1 Data File Name           | D:/ 核磁数据/ 500M- NMR-date/ 2019-1-lxw-C/ 262.fid |  |
| 2 标题                       | 2019-1-lxw-C.262.fid                            |  |
| 3 Comment                  | 13C                                             |  |
| 4 Origin                   | Bruker BioSpin GmbH                             |  |
| 5 Owner                    | root                                            |  |
| 6 Site                     |                                                 |  |
| 7 Instrument               | spect                                           |  |
| 8 Author                   |                                                 |  |
| 9 Solvent                  | CDCl <sub>3</sub>                               |  |
| 10 Temperature             | 296.3                                           |  |
| 11 Pulse Sequence          | zgpg30                                          |  |
| 12 Experiment              | 1D                                              |  |
| 13 Probe                   | 5 mm PABBO BB/ 19F-1H/ D Z-GRD Z119470/ 0117    |  |
| 14 Number of Scans         | 30                                              |  |
| 15 Receiver Gain           | 188.8                                           |  |
| 16 Relaxation Delay        | 2.0000                                          |  |
| 17 Pulse Width             | 10.0000                                         |  |
| 18 Presaturation Frequency |                                                 |  |
| 19 Acquisition Time        | 0.5505                                          |  |
| 20 Acquisition Date        | 2019-12-11T11:27:00                             |  |
| 21 Modification Date       | 2019-12-11T11:28:54                             |  |
| 22 Class                   |                                                 |  |
| 23 Spectrometer Frequency  | 125.78                                          |  |
| 24 Spectral Width          | 29761.9                                         |  |
| 25 Lowest Frequency        | -1627.5                                         |  |
| 26 Nucleus                 | 13C                                             |  |
| 27 Acquired Size           | 16384                                           |  |
| 28 Spectral Size           | 65536                                           |  |

# 4-(4-Fluorophenyl)-2-methyl-1-tosyl-1H-imidazole (3e)

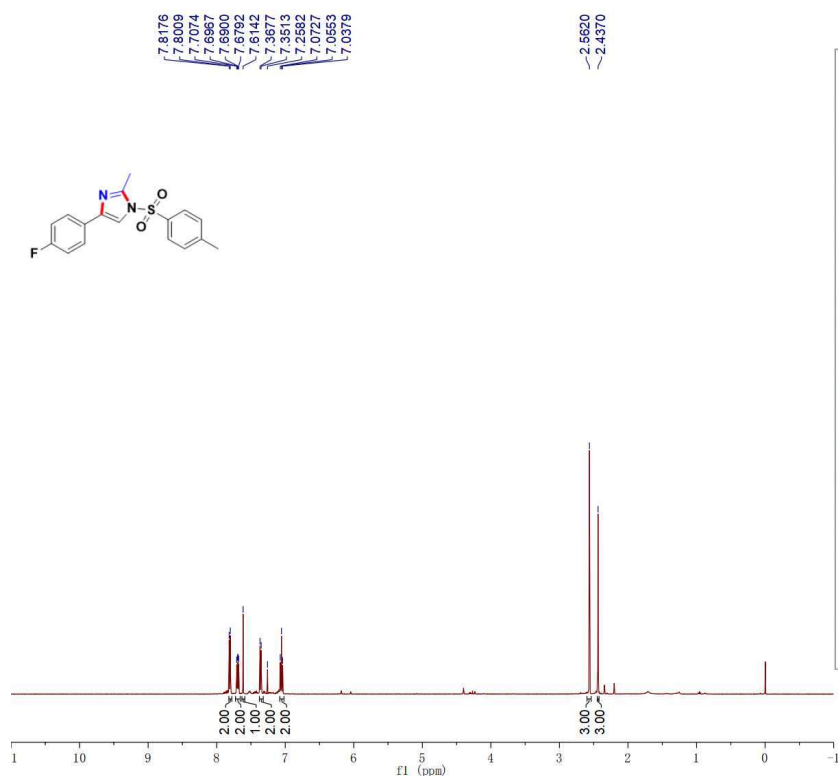

| Parameters                 |                                             |  |
|----------------------------|---------------------------------------------|--|
| Parameter                  | Value                                       |  |
| 1 Data File Name           | D:/ 核磁数据/ 2020-1-hxw-H/ 15/ fid             |  |
| 2 标题                       | 2020-1-hxw-H.15.fid                         |  |
| 3 Comment                  | 1H                                          |  |
| 4 Origin                   | Bruker BioSpin GmbH                         |  |
| 5 Owner                    | root                                        |  |
| 6 Site                     |                                             |  |
| 7 Instrument               | spect                                       |  |
| 8 Author                   |                                             |  |
| 9 Solvent                  | CDCl3                                       |  |
| 10 Temperature             | 295.7                                       |  |
| 11 Pulse Sequence          | zg30                                        |  |
| 12 Experiment              | 1D                                          |  |
| 13 Probe                   | Z119470_0117 (PA BBO 500S1 BBF-H-D-05 Z SP) |  |
| 14 Number of Scans         | 2                                           |  |
| 15 Receiver Gain           | 87.0                                        |  |
| 16 Relaxation Delay        | 2.0000                                      |  |
| 17 Pulse Width             | 12.0000                                     |  |
| 18 Presaturation Frequency |                                             |  |
| 19 Acquisition Time        | 1.8175                                      |  |
| 20 Acquisition Date        | 2019-12-26T11:01:59                         |  |
| 21 Modification Date       | 2019-12-26T11:02:00                         |  |
| 22 Class                   |                                             |  |
| 23 Spectrometer Frequency  | 500.16                                      |  |
| 24 Spectral Width          | 9014.4                                      |  |
| 25 Lowest Frequency        | -1519.4                                     |  |
| 26 Nucleus                 | 1H                                          |  |
| 27 Acquired Size           | 16384                                       |  |
| 28 Spectral Size           | 65536                                       |  |

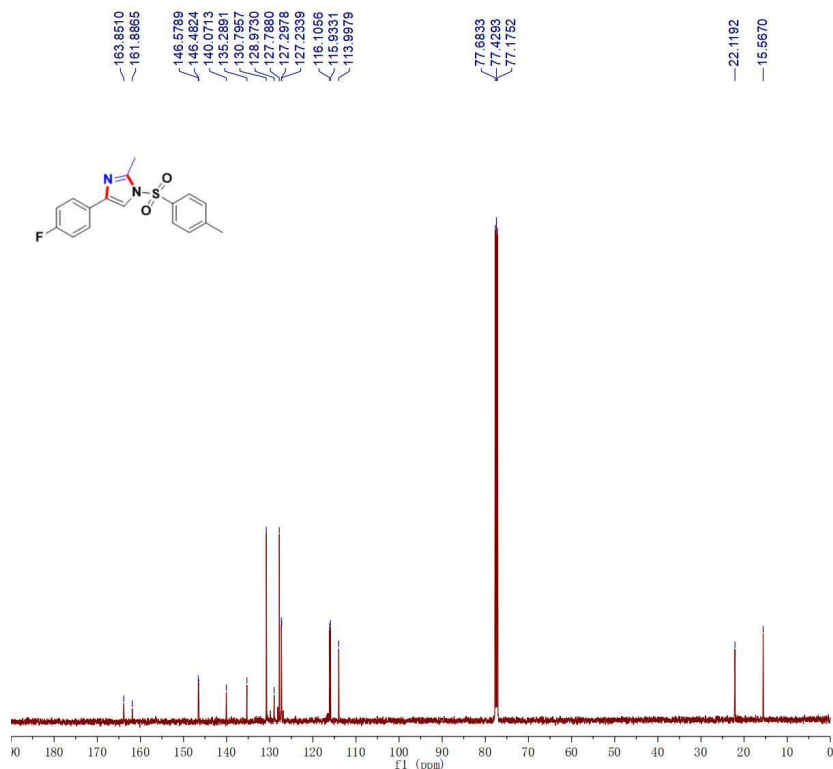

| Parameters                 |                                             |  |
|----------------------------|---------------------------------------------|--|
| Parameter                  | Value                                       |  |
| 1 Data File Name           | D:/ 核磁数据/ 2020-1-hxw-C/ 15/ fid             |  |
| 2 标题                       | 2020-1-hxw-C.15.fid                         |  |
| 3 Comment                  | 13C                                         |  |
| 4 Origin                   | Bruker BioSpin GmbH                         |  |
| 5 Owner                    | root                                        |  |
| 6 Site                     |                                             |  |
| 7 Instrument               | spect                                       |  |
| 8 Author                   |                                             |  |
| 9 Solvent                  | CDCl3                                       |  |
| 10 Temperature             | 296.0                                       |  |
| 11 Pulse Sequence          | zgpg30                                      |  |
| 12 Experiment              | 1D                                          |  |
| 13 Probe                   | Z119470_0117 (PA BBO 500S1 BBF-H-D-05 Z SP) |  |
| 14 Number of Scans         | 180                                         |  |
| 15 Receiver Gain           | 188.8                                       |  |
| 16 Relaxation Delay        | 2.0000                                      |  |
| 17 Pulse Width             | 10.0000                                     |  |
| 18 Presaturation Frequency |                                             |  |
| 19 Acquisition Time        | 0.5505                                      |  |
| 20 Acquisition Date        | 2019-12-26T11:12:06                         |  |
| 21 Modification Date       | 2019-12-26T11:12:08                         |  |
| 22 Class                   |                                             |  |
| 23 Spectrometer Frequency  | 125.78                                      |  |
| 24 Spectral Width          | 29761.9                                     |  |
| 25 Lowest Frequency        | -1627.5                                     |  |
| 26 Nucleus                 | 13C                                         |  |
| 27 Acquired Size           | 16384                                       |  |
| 28 Spectral Size           | 65536                                       |  |

# 4-(4-Chlorophenyl)-2-methyl-1-tosyl-1H-imidazole (3f)

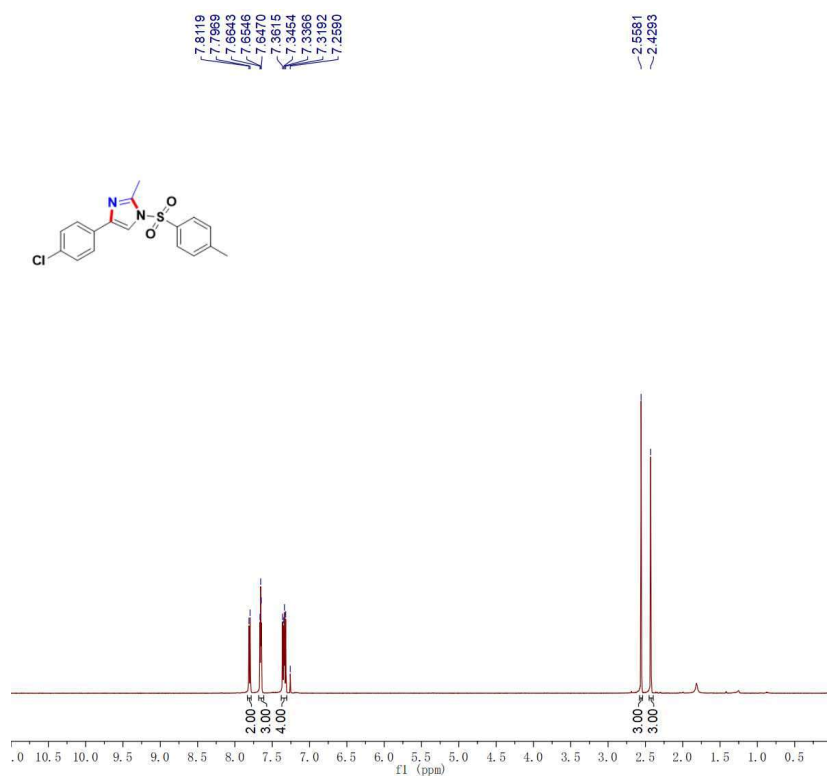

| Parameters                 |                                             |
|----------------------------|---------------------------------------------|
| Parameter                  | Value                                       |
| 1 Data File Name           | D:/ 核磁数据/ 20201011/ 2020-1-sy3-H/ 274.fid   |
| 2 标题                       | 2020-1-sy3-H.274.fid                        |
| 3 Comment                  | 1H ztt                                      |
| 4 Origin                   | Brucker BioSpin GmbH                        |
| 5 Owner                    | nmusu                                       |
| 6 Site                     |                                             |
| 7 Instrument               | spect                                       |
| 8 Author                   |                                             |
| 9 Solvent                  | CDCl3                                       |
| 10 Temperature             | 299.0                                       |
| 11 Pulse Sequence          | zg30                                        |
| 12 Experiment              | 1D                                          |
| 13 Probe                   | Z119470_0117 (PA BBO 500SI BBF-H-D-05 Z SP) |
| 14 Number of Scans         | 2                                           |
| 15 Receiver Gain           | 66.5                                        |
| 16 Relaxation Delay        | 2.0000                                      |
| 17 Pulse Width             | 12.0000                                     |
| 18 Presaturation Frequency |                                             |
| 19 Acquisition Time        | 1.8175                                      |
| 20 Acquisition Date        | 2020-08-01T10:45:24                         |
| 21 Modification Date       | 2020-08-01T10:45:26                         |
| 22 Class                   |                                             |
| 23 Spectrometer Frequency  | 500.16                                      |
| 24 Spectral Width          | 9014.4                                      |
| 25 Lowest Frequency        | -1519.4                                     |
| 26 Nucleus                 | 1H                                          |
| 27 Acquired Size           | 16384                                       |
| 28 Spectral Size           | 65536                                       |

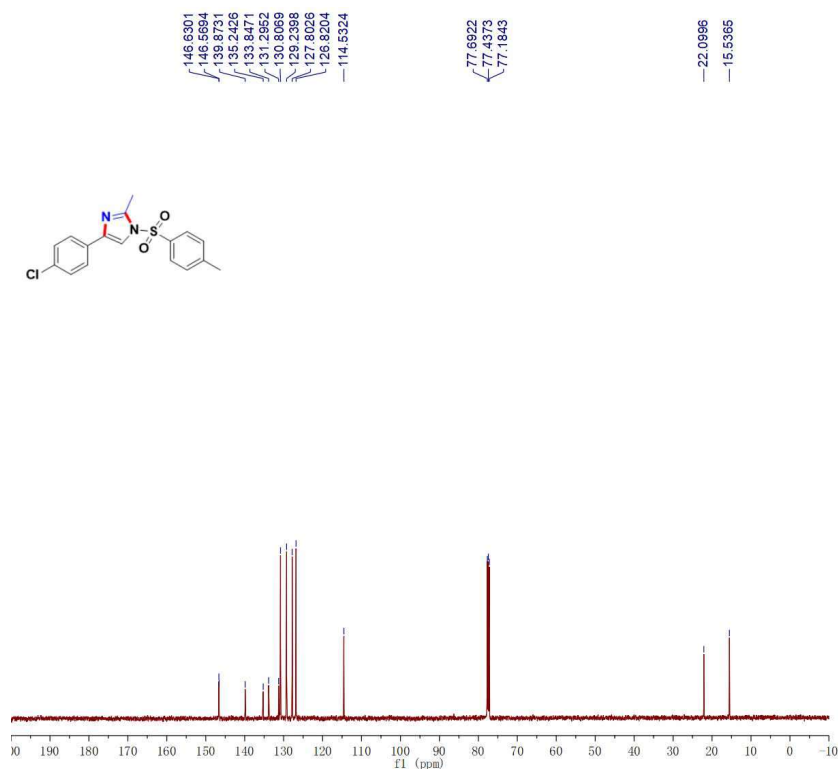

| Parameters                 |                                             |
|----------------------------|---------------------------------------------|
| Parameter                  | Value                                       |
| 1 Data File Name           | D:/ 核磁数据/ 20201011/ 2020-1-sy3-C/ 117.fid   |
| 2 标题                       | 2020-1-sy3-C.117.fid                        |
| 3 Comment                  | 13C ztt                                     |
| 4 Origin                   | Brucker BioSpin GmbH                        |
| 5 Owner                    | nmusu                                       |
| 6 Site                     |                                             |
| 7 Instrument               | spect                                       |
| 8 Author                   |                                             |
| 9 Solvent                  | CDCl3                                       |
| 10 Temperature             | 300.7                                       |
| 11 Pulse Sequence          | zgpg30                                      |
| 12 Experiment              | 1D                                          |
| 13 Probe                   | Z119470_0117 (PA BBO 500SI BBF-H-D-05 Z SP) |
| 14 Number of Scans         | 90                                          |
| 15 Receiver Gain           | 188.8                                       |
| 16 Relaxation Delay        | 2.0000                                      |
| 17 Pulse Width             | 10.0000                                     |
| 18 Presaturation Frequency |                                             |
| 19 Acquisition Time        | 0.5505                                      |
| 20 Acquisition Date        | 2020-08-01T16:31:49                         |
| 21 Modification Date       | 2020-08-01T16:31:52                         |
| 22 Class                   |                                             |
| 23 Spectrometer Frequency  | 125.78                                      |
| 24 Spectral Width          | 29761.9                                     |
| 25 Lowest Frequency        | -1627.5                                     |
| 26 Nucleus                 | 13C                                         |
| 27 Acquired Size           | 16384                                       |
| 28 Spectral Size           | 65536                                       |

# 4-(4-Bromophenyl)-2-methyl-1-tosyl-1H-imidazole (3g)

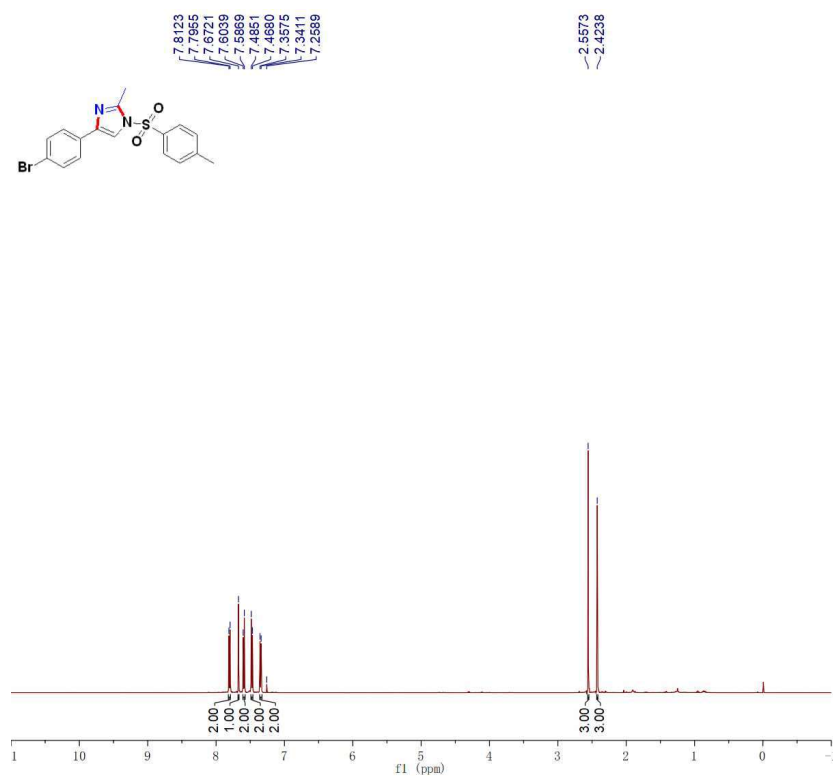

| Parameters                 |                                             |
|----------------------------|---------------------------------------------|
| Parameter                  | Value                                       |
| 1 Data File Name           | D:\核磁数据\nmr\17.fid                          |
| 2 标题                       | 2020-1-sy-j-H/17.fid                        |
| 3 Comment                  | 1H ztt                                      |
| 4 Origin                   | Bruker BioSpin GmbH                         |
| 5 Owner                    | root                                        |
| 6 Site                     |                                             |
| 7 Instrument               | spect                                       |
| 8 Author                   |                                             |
| 9 Solvent                  | CDCl3                                       |
| 10 Temperature             | 294.6                                       |
| 11 Pulse Sequence          | zg30                                        |
| 12 Experiment              | 1D                                          |
| 13 Probe                   | Z119470_0117 (PA BBO 500S1 BBF-H-D-05 Z SP) |
| 14 Number of Scans         | 2                                           |
| 15 Receiver Gain           | 48.1                                        |
| 16 Relaxation Delay        | 2.0000                                      |
| 17 Pulse Width             | 12.0000                                     |
| 18 Presaturation Frequency |                                             |
| 19 Acquisition Time        | 1.8175                                      |
| 20 Acquisition Date        | 2019-12-30T11:03:18                         |
| 21 Modification Date       | 2019-12-30T11:03:20                         |
| 22 Class                   |                                             |
| 23 Spectrometer Frequency  | 500.16                                      |
| 24 Spectral Width          | 9014.4                                      |
| 25 Lowest Frequency        | -1519.4                                     |
| 26 Nucleus                 | 1H                                          |
| 27 Acquired Size           | 16384                                       |
| 28 Spectral Size           | 65536                                       |

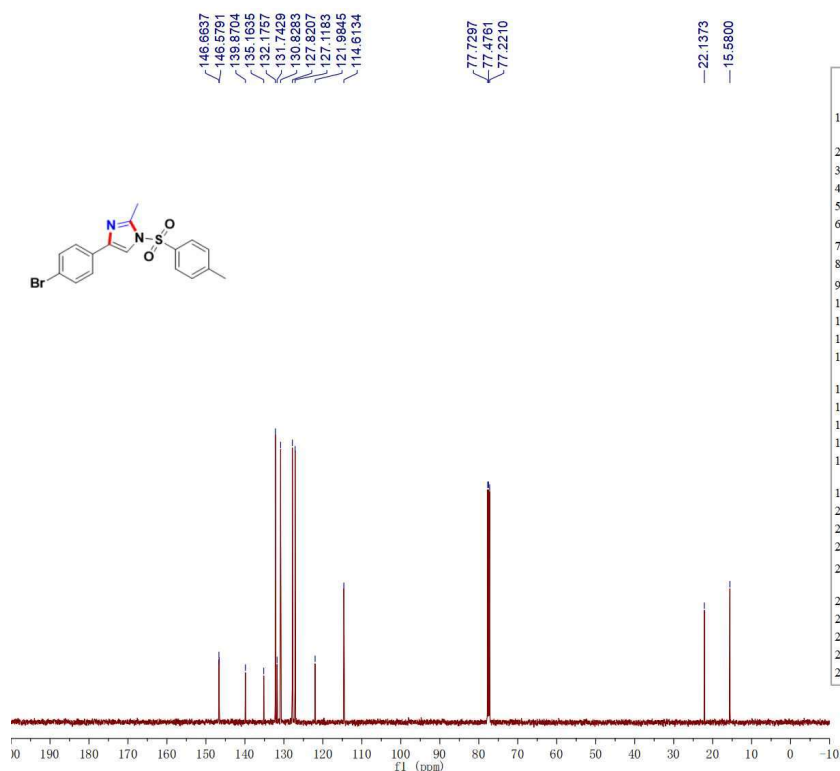

| Parameters                 |                                             |
|----------------------------|---------------------------------------------|
| Parameter                  | Value                                       |
| 1 Data File Name           | D:\核磁数据\nmr\2.fid                           |
| 2 标题                       | 2020-1-sy-j-C/2.fid                         |
| 3 Comment                  | 13C ztt                                     |
| 4 Origin                   | Bruker BioSpin GmbH                         |
| 5 Owner                    | root                                        |
| 6 Site                     |                                             |
| 7 Instrument               | spect                                       |
| 8 Author                   |                                             |
| 9 Solvent                  | CDCl3                                       |
| 10 Temperature             | 295.0                                       |
| 11 Pulse Sequence          | zgpg30                                      |
| 12 Experiment              | 1D                                          |
| 13 Probe                   | Z119470_0117 (PA BBO 500S1 BBF-H-D-05 Z SP) |
| 14 Number of Scans         | 60                                          |
| 15 Receiver Gain           | 188.8                                       |
| 16 Relaxation Delay        | 2.0000                                      |
| 17 Pulse Width             | 10.0000                                     |
| 18 Presaturation Frequency |                                             |
| 19 Acquisition Time        | 0.5505                                      |
| 20 Acquisition Date        | 2019-12-30T11:38:07                         |
| 21 Modification Date       | 2019-12-30T11:38:10                         |
| 22 Class                   |                                             |
| 23 Spectrometer Frequency  | 125.78                                      |
| 24 Spectral Width          | 29761.9                                     |
| 25 Lowest Frequency        | -1627.5                                     |
| 26 Nucleus                 | 13C                                         |
| 27 Acquired Size           | 16384                                       |
| 28 Spectral Size           | 65536                                       |

# 4-(4-(*tert*-Butyl)phenyl)-2-methyl-1H-imidazole (3h)

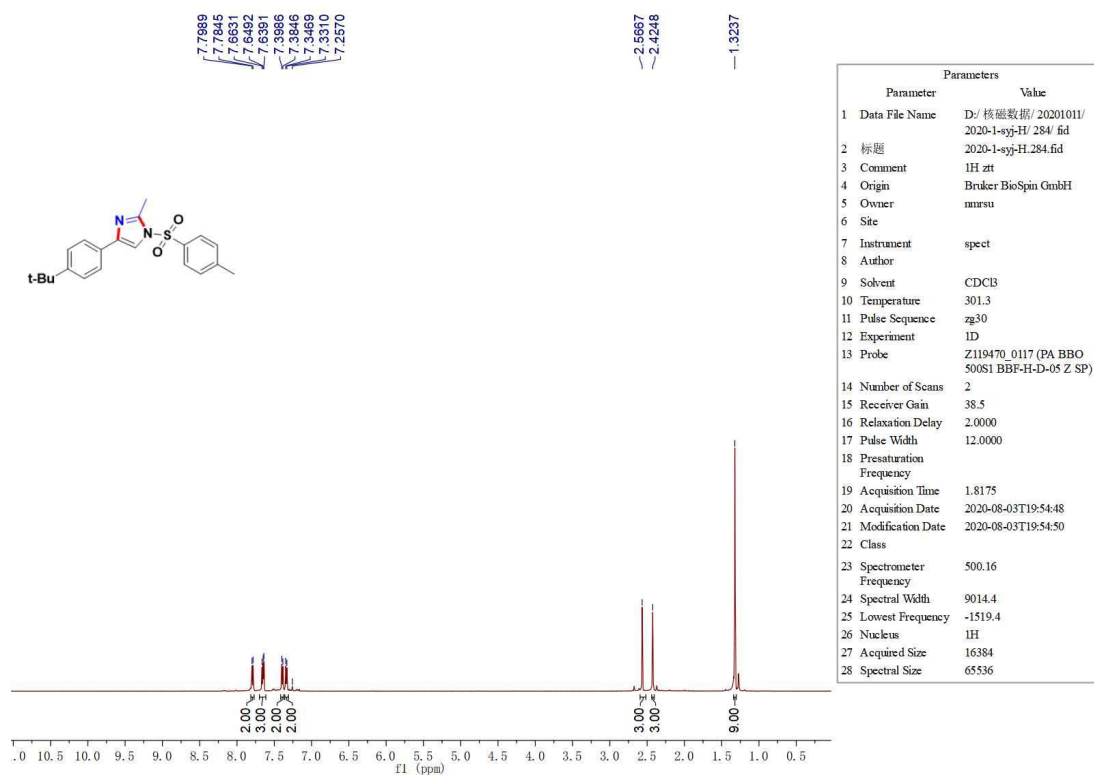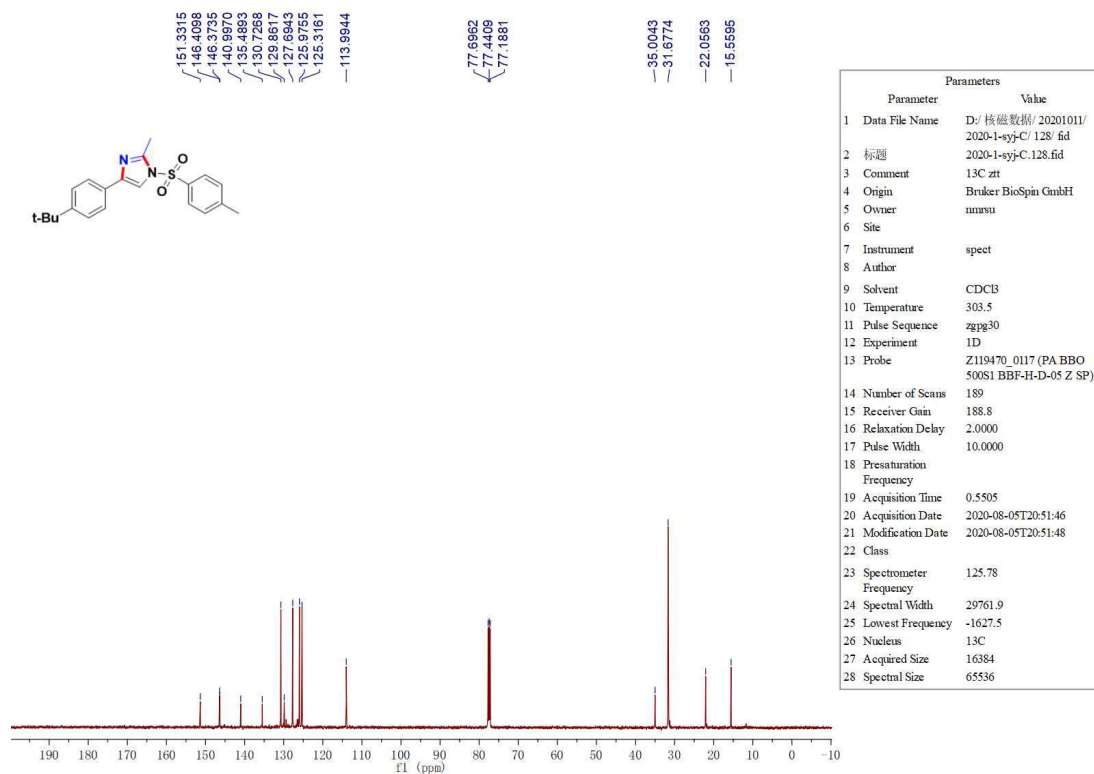



## 2-Methyl-1-tosyl-4-(4-(trifluoromethyl)phenyl)-1*H*-imidazole (3i)

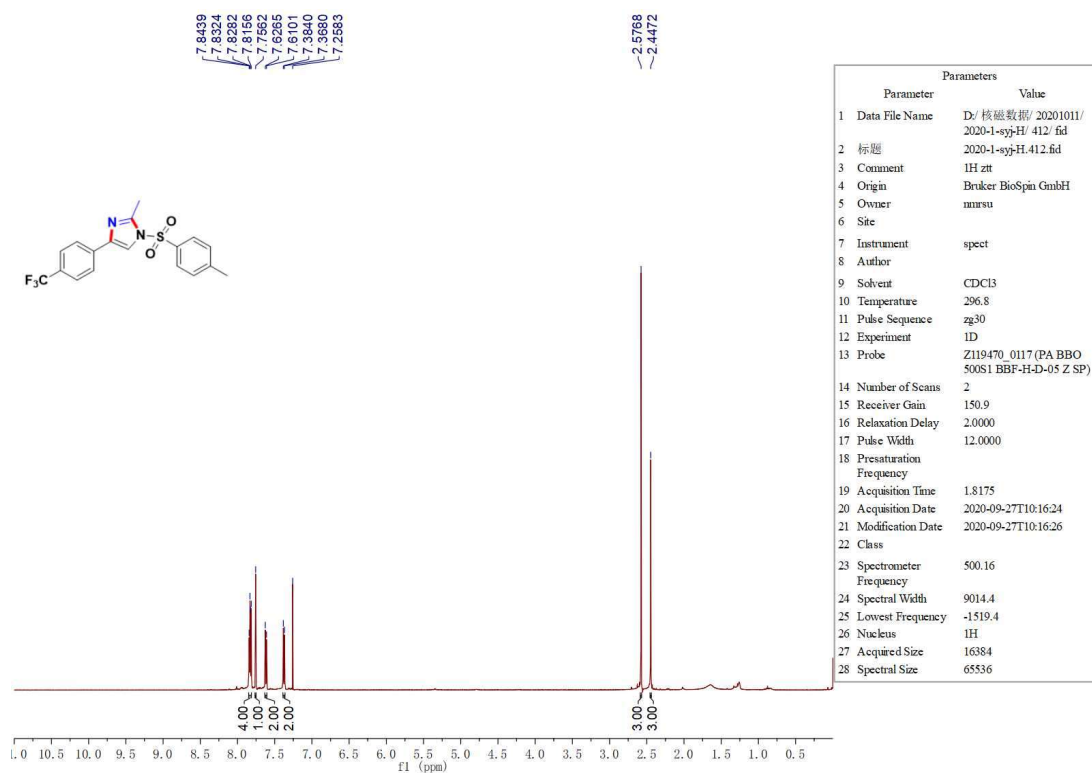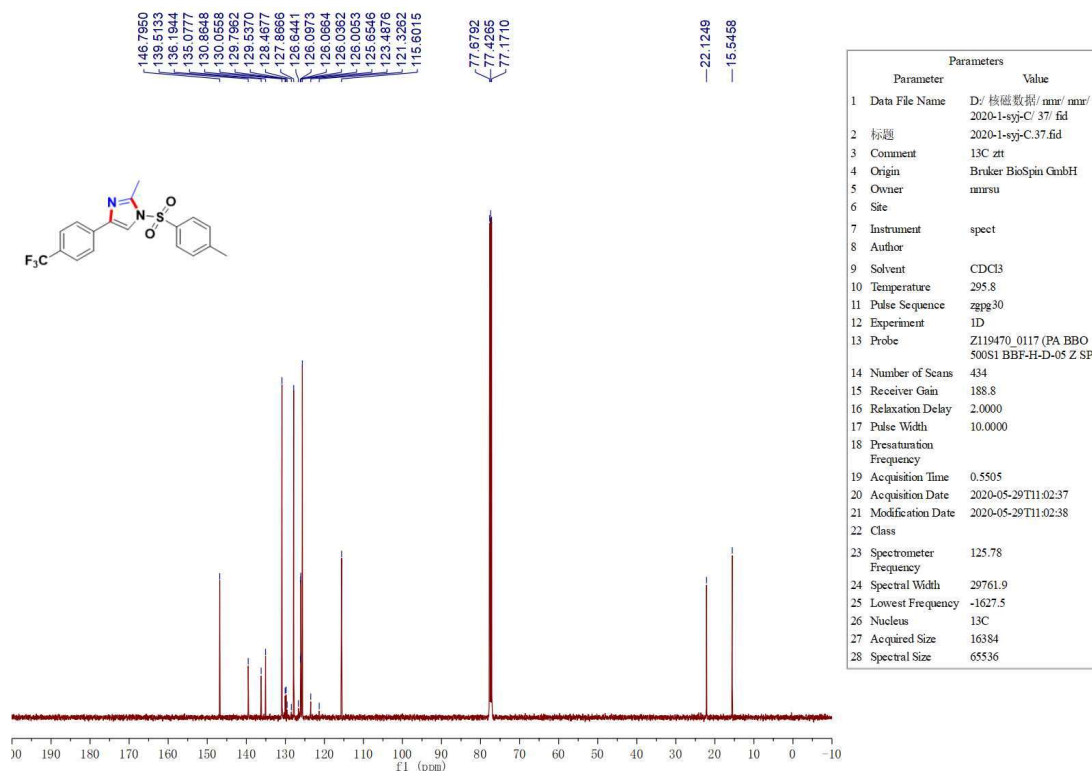



## 2-Methyl-4-(4'-propyl-[1, 1'-biphenyl]-4-yl)-1-tosyl-1*H*-imidazole (3j)

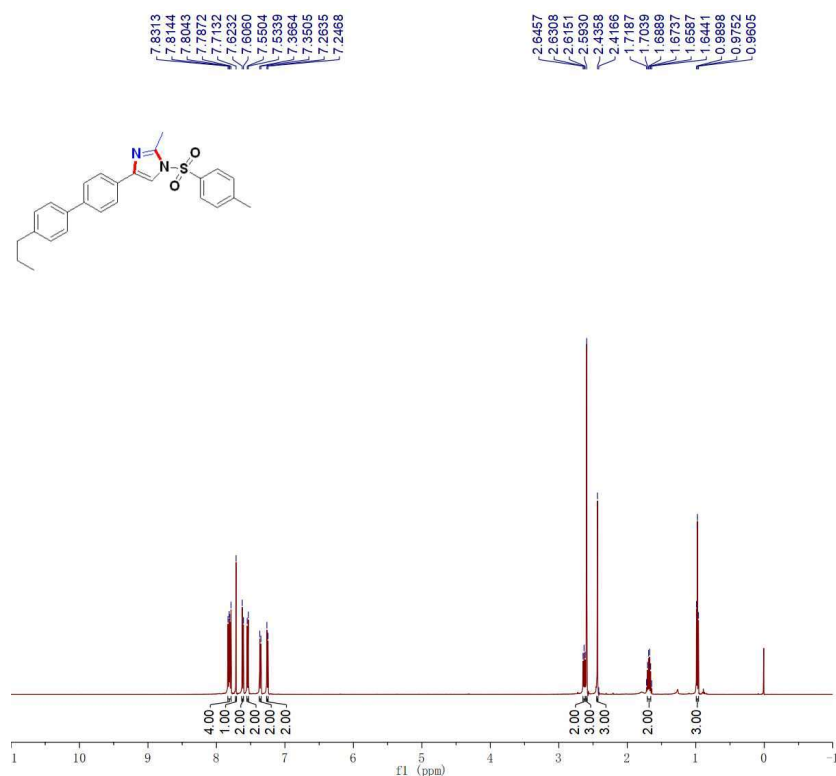

| Parameters                 |                                             |  |
|----------------------------|---------------------------------------------|--|
| Parameter                  | Value                                       |  |
| 1 Data File Name           | D:/ 核磁数据/ nmr/ nmr/                         |  |
| 2 标题                       | 2020-1-syy-H/ 112/ fid                      |  |
| 3 Comment                  | 1H ztt                                      |  |
| 4 Origin                   | Bruker BioSpin GmbH                         |  |
| 5 Owner                    | nmrsu                                       |  |
| 6 Site                     |                                             |  |
| 7 Instrument               | spect                                       |  |
| 8 Author                   |                                             |  |
| 9 Solvent                  | CDCl <sub>3</sub>                           |  |
| 10 Temperature             | 295.5                                       |  |
| 11 Pulse Sequence          | zg30                                        |  |
| 12 Experiment              | 1D                                          |  |
| 13 Probe                   | Z119470_0117 (PA BBO 500S1 BBF-H-D-05 Z SP) |  |
| 14 Number of Scans         | 2                                           |  |
| 15 Receiver Gain           | 38.5                                        |  |
| 16 Relaxation Delay        | 2.0000                                      |  |
| 17 Pulse Width             | 12.0000                                     |  |
| 18 Presaturation Frequency |                                             |  |
| 19 Acquisition Time        | 1.8175                                      |  |
| 20 Acquisition Date        | 2020-06-01T10:28:16                         |  |
| 21 Modification Date       | 2020-06-01T10:28:18                         |  |
| 22 Class                   |                                             |  |
| 23 Spectrometer Frequency  | 500.16                                      |  |
| 24 Spectral Width          | 9014.4                                      |  |
| 25 Lowest Frequency        | -1519.4                                     |  |
| 26 Nucleus                 | 1H                                          |  |
| 27 Acquired Size           | 16384                                       |  |
| 28 Spectral Size           | 65536                                       |  |

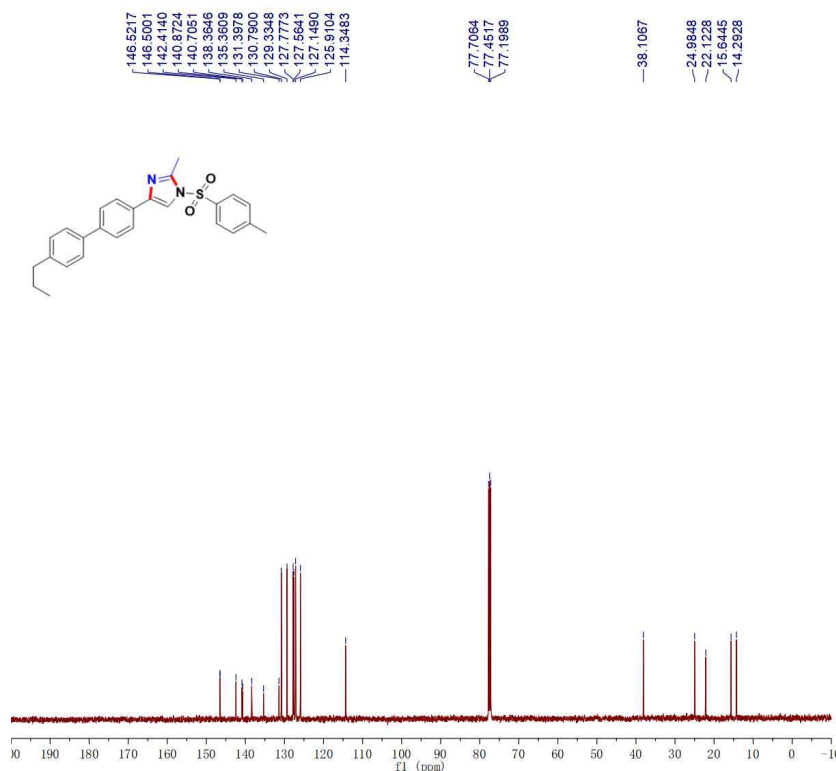

| Parameters                 |                                             |  |
|----------------------------|---------------------------------------------|--|
| Parameter                  | Value                                       |  |
| 1 Data File Name           | D:/ 核磁数据/ nmr/ nmr/                         |  |
| 2 标题                       | 2020-1-syy-C/ 40/ fid                       |  |
| 3 Comment                  | 13C ztt                                     |  |
| 4 Origin                   | Bruker BioSpin GmbH                         |  |
| 5 Owner                    | nmrsu                                       |  |
| 6 Site                     |                                             |  |
| 7 Instrument               | spect                                       |  |
| 8 Author                   |                                             |  |
| 9 Solvent                  | CDCl <sub>3</sub>                           |  |
| 10 Temperature             | 295.8                                       |  |
| 11 Pulse Sequence          | zgpg30                                      |  |
| 12 Experiment              | 1D                                          |  |
| 13 Probe                   | Z119470_0117 (PA BBO 500S1 BBF-H-D-05 Z SP) |  |
| 14 Number of Scans         | 71                                          |  |
| 15 Receiver Gain           | 188.8                                       |  |
| 16 Relaxation Delay        | 2.0000                                      |  |
| 17 Pulse Width             | 10.0000                                     |  |
| 18 Presaturation Frequency |                                             |  |
| 19 Acquisition Time        | 0.5505                                      |  |
| 20 Acquisition Date        | 2020-06-01T10:33:47                         |  |
| 21 Modification Date       | 2020-06-01T10:33:50                         |  |
| 22 Class                   |                                             |  |
| 23 Spectrometer Frequency  | 125.78                                      |  |
| 24 Spectral Width          | 29761.9                                     |  |
| 25 Lowest Frequency        | -1627.5                                     |  |
| 26 Nucleus                 | 13C                                         |  |
| 27 Acquired Size           | 16384                                       |  |
| 28 Spectral Size           | 65536                                       |  |

## 2-Methyl-4-(*m*-tolyl)-1-tosyl-1*H*-imidazole (3k)

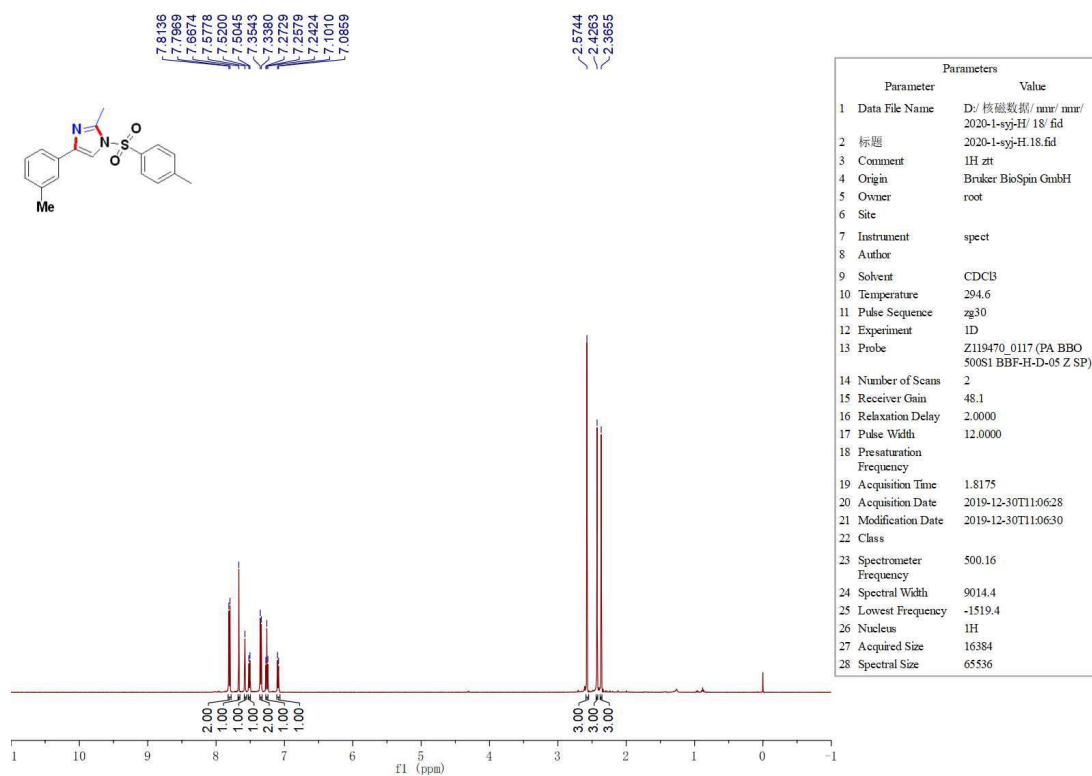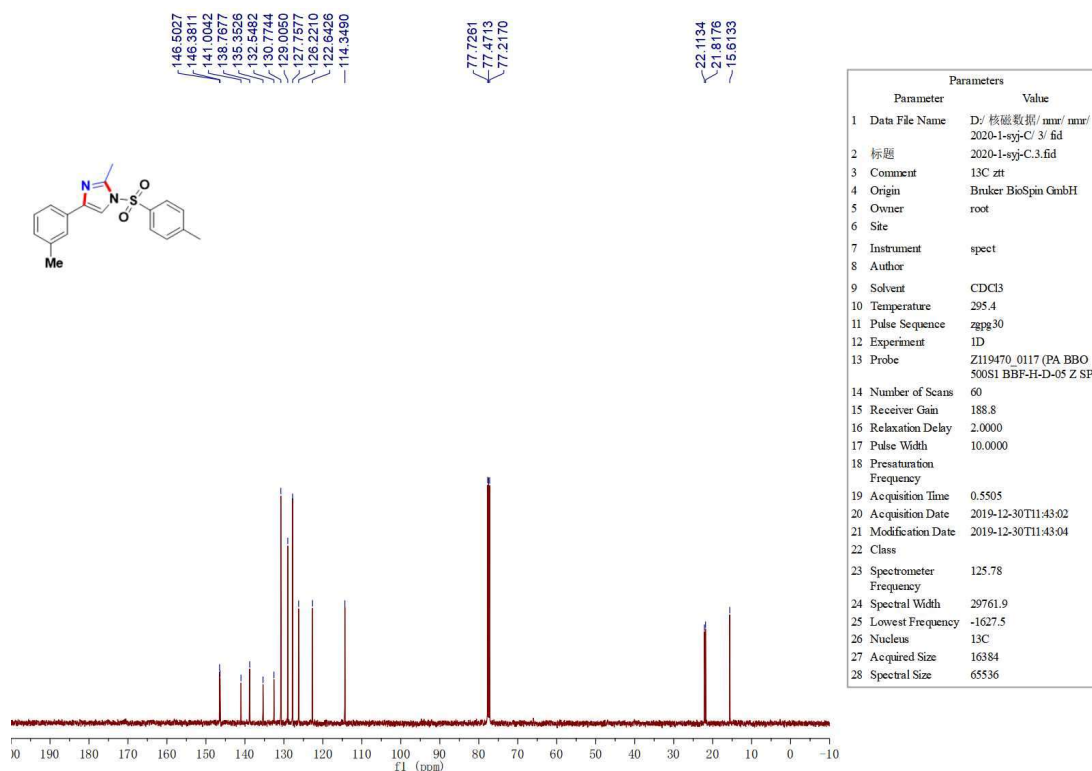

# 4-(3-Chlorophenyl)-2-methyl-1-tosyl-1H-imidazole (3l)

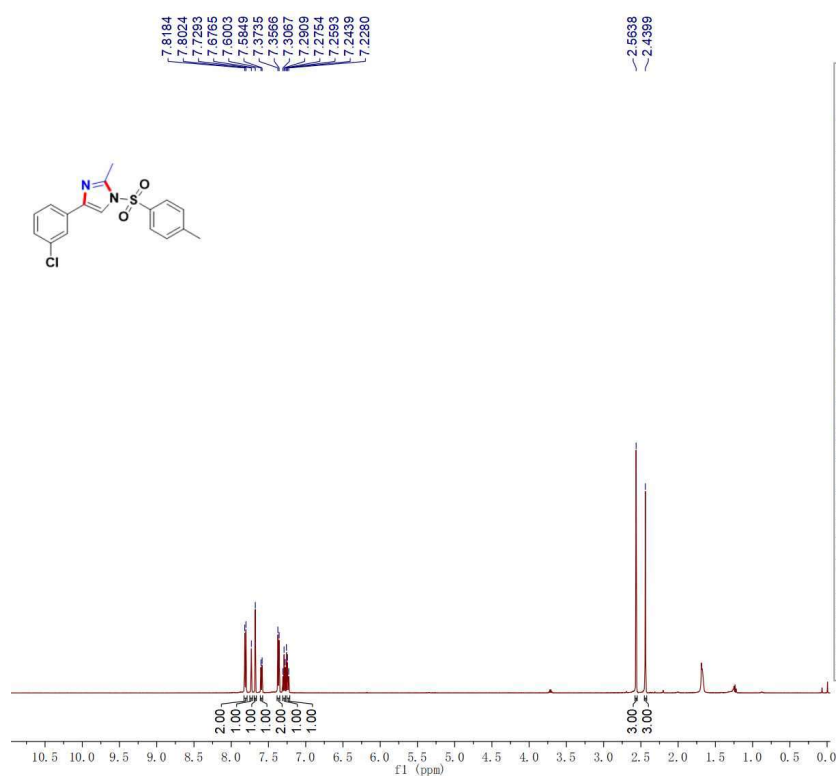

| Parameters                 |                                             |
|----------------------------|---------------------------------------------|
| Parameter                  | Value                                       |
| 1 Data File Name           | D:/ 核磁数据/ 20201011/ 2020-1-sy-H/ 251/ fid   |
| 2 标题                       | 2020-1-sy-H-251.fid                         |
| 3 Comment                  | 1H ztt                                      |
| 4 Origin                   | Brucker BioSpin GmbH                        |
| 5 Owner                    | nmrsu                                       |
| 6 Site                     |                                             |
| 7 Instrument               | spect                                       |
| 8 Author                   |                                             |
| 9 Solvent                  | CDCl3                                       |
| 10 Temperature             | 297.5                                       |
| 11 Pulse Sequence          | zg30                                        |
| 12 Experiment              | 1D                                          |
| 13 Probe                   | Z119470_0117 (PA BBO 500S1 BBF-H-D-05 Z SP) |
| 14 Number of Scans         | 2                                           |
| 15 Receiver Gain           | 108.7                                       |
| 16 Relaxation Delay        | 2.0000                                      |
| 17 Pulse Width             | 12.0000                                     |
| 18 Presaturation Frequency |                                             |
| 19 Acquisition Time        | 1.8175                                      |
| 20 Acquisition Date        | 2020-07-19T21:15:02                         |
| 21 Modification Date       | 2020-07-19T21:15:04                         |
| 22 Class                   |                                             |
| 23 Spectrometer Frequency  | 500.16                                      |
| 24 Spectral Width          | 9014.4                                      |
| 25 Lowest Frequency        | -1519.4                                     |
| 26 Nucleus                 | 1H                                          |
| 27 Acquired Size           | 16384                                       |
| 28 Spectral Size           | 65536                                       |

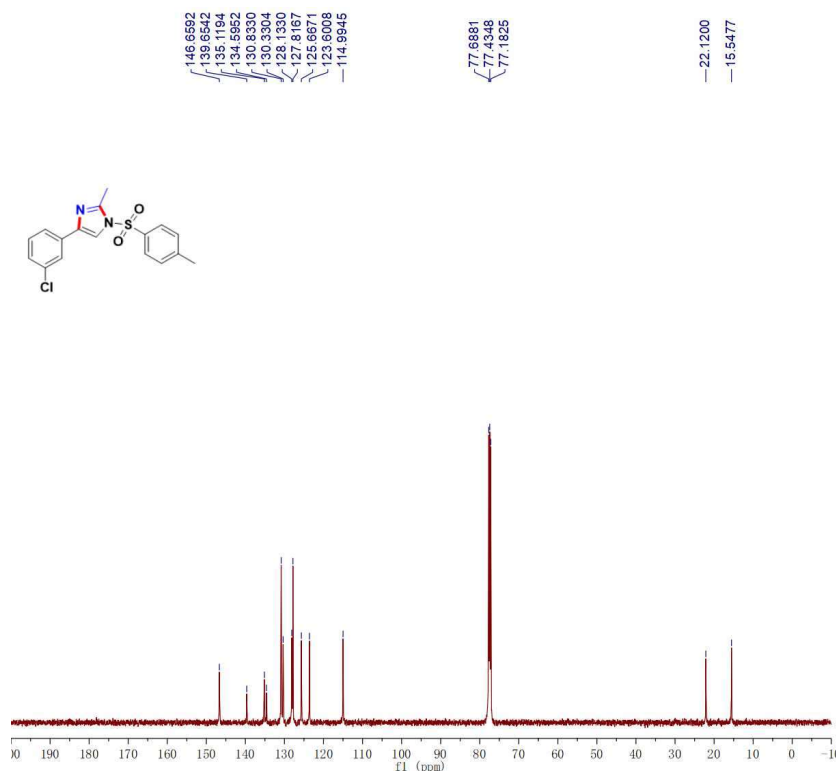

| Parameters                 |                                             |
|----------------------------|---------------------------------------------|
| Parameter                  | Value                                       |
| 1 Data File Name           | D:/ 核磁数据/ 20201011/ 2020-1-sy-C/ 97/ fid    |
| 2 标题                       | 2020-1-sy-C-97.fid                          |
| 3 Comment                  | 13C ztt                                     |
| 4 Origin                   | Brucker BioSpin GmbH                        |
| 5 Owner                    | nmrsu                                       |
| 6 Site                     |                                             |
| 7 Instrument               | spect                                       |
| 8 Author                   |                                             |
| 9 Solvent                  | CDCl3                                       |
| 10 Temperature             | 297.3                                       |
| 11 Pulse Sequence          | zgpg30                                      |
| 12 Experiment              | 1D                                          |
| 13 Probe                   | Z119470_0117 (PA BBO 500S1 BBF-H-D-05 Z SP) |
| 14 Number of Scans         | 2000                                        |
| 15 Receiver Gain           | 188.8                                       |
| 16 Relaxation Delay        | 2.0000                                      |
| 17 Pulse Width             | 10.0000                                     |
| 18 Presaturation Frequency |                                             |
| 19 Acquisition Time        | 0.5505                                      |
| 20 Acquisition Date        | 2020-07-17T13:43:42                         |
| 21 Modification Date       | 2020-07-17T13:43:44                         |
| 22 Class                   |                                             |
| 23 Spectrometer Frequency  | 125.78                                      |
| 24 Spectral Width          | 29761.9                                     |
| 25 Lowest Frequency        | -1627.5                                     |
| 26 Nucleus                 | 13C                                         |
| 27 Acquired Size           | 16384                                       |
| 28 Spectral Size           | 65536                                       |

# 4-(3-Bromophenyl)-2-methyl-1-tosyl-1H-imidazole (3m)

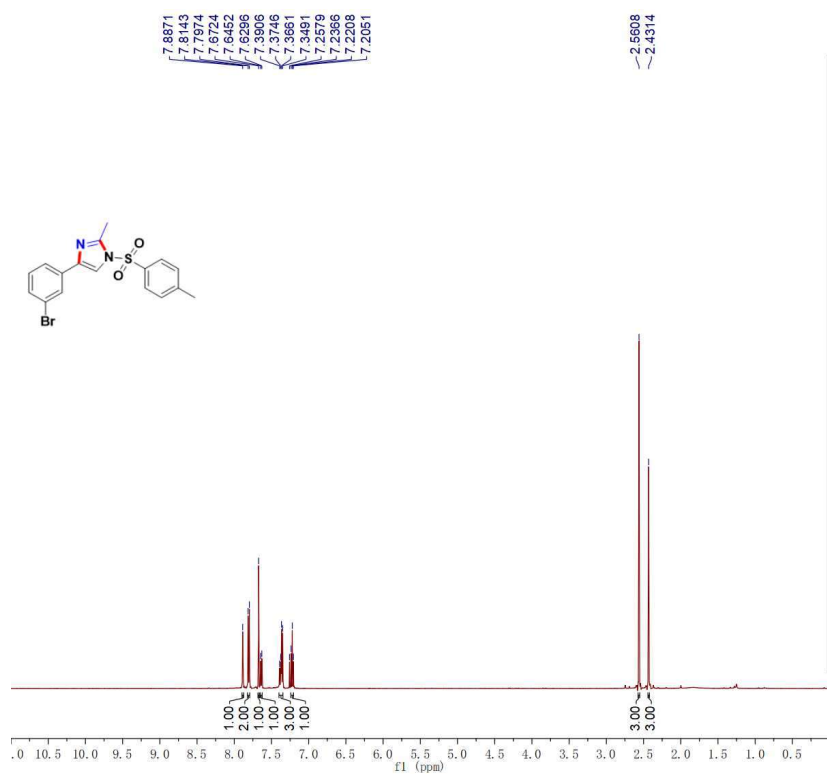

| Parameters                 |                                             |
|----------------------------|---------------------------------------------|
| Parameter                  | Value                                       |
| 1 Data File Name           | D:\核磁数据\20201011\2020-1-sy-H-275.fid        |
| 2 标题                       | 2020-1-sy-H-275.fid                         |
| 3 Comment                  | 1H ztt                                      |
| 4 Origin                   | Bruker BioSpin GmbH                         |
| 5 Owner                    | nmrsu                                       |
| 6 Site                     |                                             |
| 7 Instrument               | spect                                       |
| 8 Author                   |                                             |
| 9 Solvent                  | CDCl <sub>3</sub>                           |
| 10 Temperature             | 299.0                                       |
| 11 Pulse Sequence          | zg30                                        |
| 12 Experiment              | 1D                                          |
| 13 Probe                   | Z119470_0117 (PA BBO 500S1 BBR-H-D-05 Z SP) |
| 14 Number of Scans         | 2                                           |
| 15 Receiver Gain           | 66.5                                        |
| 16 Relaxation Delay        | 2.0000                                      |
| 17 Pulse Width             | 12.0000                                     |
| 18 Presaturation Frequency |                                             |
| 19 Acquisition Time        | 1.8175                                      |
| 20 Acquisition Date        | 2020-08-01T10:49:13                         |
| 21 Modification Date       | 2020-08-01T10:49:14                         |
| 22 Class                   |                                             |
| 23 Spectrometer Frequency  | 500.16                                      |
| 24 Spectral Width          | 9014.4                                      |
| 25 Lowest Frequency        | -1519.4                                     |
| 26 Nucleus                 | <sup>1</sup> H                              |
| 27 Acquired Size           | 16384                                       |
| 28 Spectral Size           | 65536                                       |

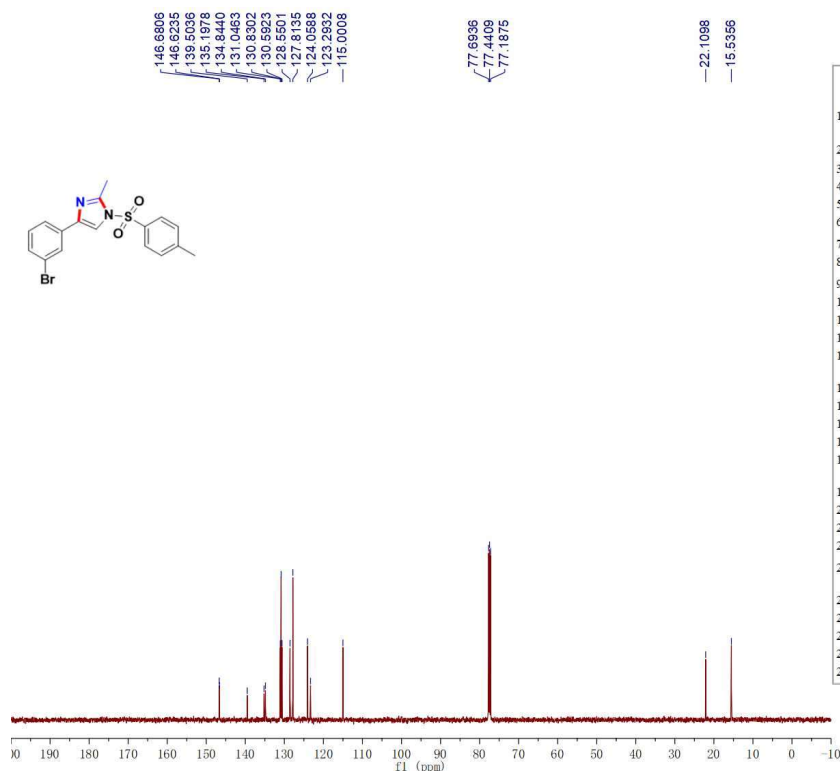

| Parameters                 |                                             |
|----------------------------|---------------------------------------------|
| Parameter                  | Value                                       |
| 1 Data File Name           | D:\核磁数据\20201011\2020-1-sy-C-118.fid        |
| 2 标题                       | 2020-1-sy-C-118.fid                         |
| 3 Comment                  | 13C ztt                                     |
| 4 Origin                   | Bruker BioSpin GmbH                         |
| 5 Owner                    | nmrsu                                       |
| 6 Site                     |                                             |
| 7 Instrument               | spect                                       |
| 8 Author                   |                                             |
| 9 Solvent                  | CDCl <sub>3</sub>                           |
| 10 Temperature             | 300.6                                       |
| 11 Pulse Sequence          | zgpg30                                      |
| 12 Experiment              | 1D                                          |
| 13 Probe                   | Z119470_0117 (PA BBO 500S1 BBR-H-D-05 Z SP) |
| 14 Number of Scans         | 60                                          |
| 15 Receiver Gain           | 188.8                                       |
| 16 Relaxation Delay        | 2.0000                                      |
| 17 Pulse Width             | 10.0000                                     |
| 18 Presaturation Frequency |                                             |
| 19 Acquisition Time        | 0.5505                                      |
| 20 Acquisition Date        | 2020-08-01T16:37:30                         |
| 21 Modification Date       | 2020-08-01T16:37:32                         |
| 22 Class                   |                                             |
| 23 Spectrometer Frequency  | 125.78                                      |
| 24 Spectral Width          | 29761.9                                     |
| 25 Lowest Frequency        | -1627.5                                     |
| 26 Nucleus                 | <sup>13</sup> C                             |
| 27 Acquired Size           | 16384                                       |
| 28 Spectral Size           | 65536                                       |

# 4-(2-Fluorophenyl)-2-methyl-1-tosyl-1H-imidazole (3n)

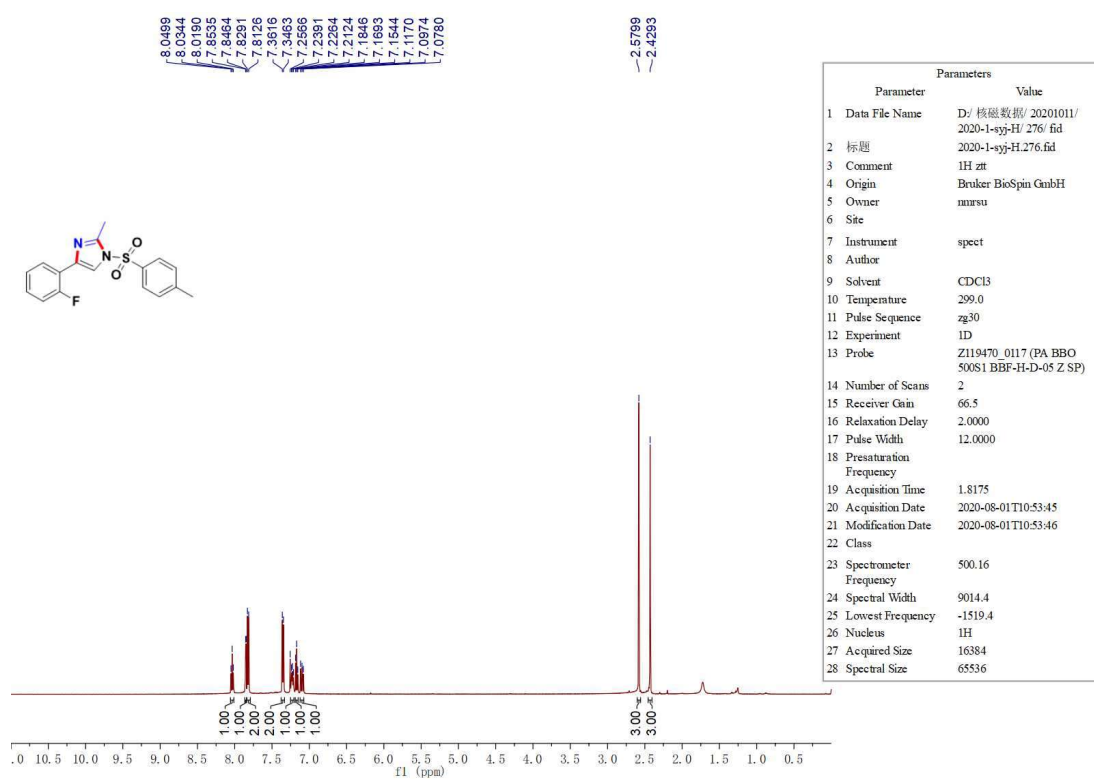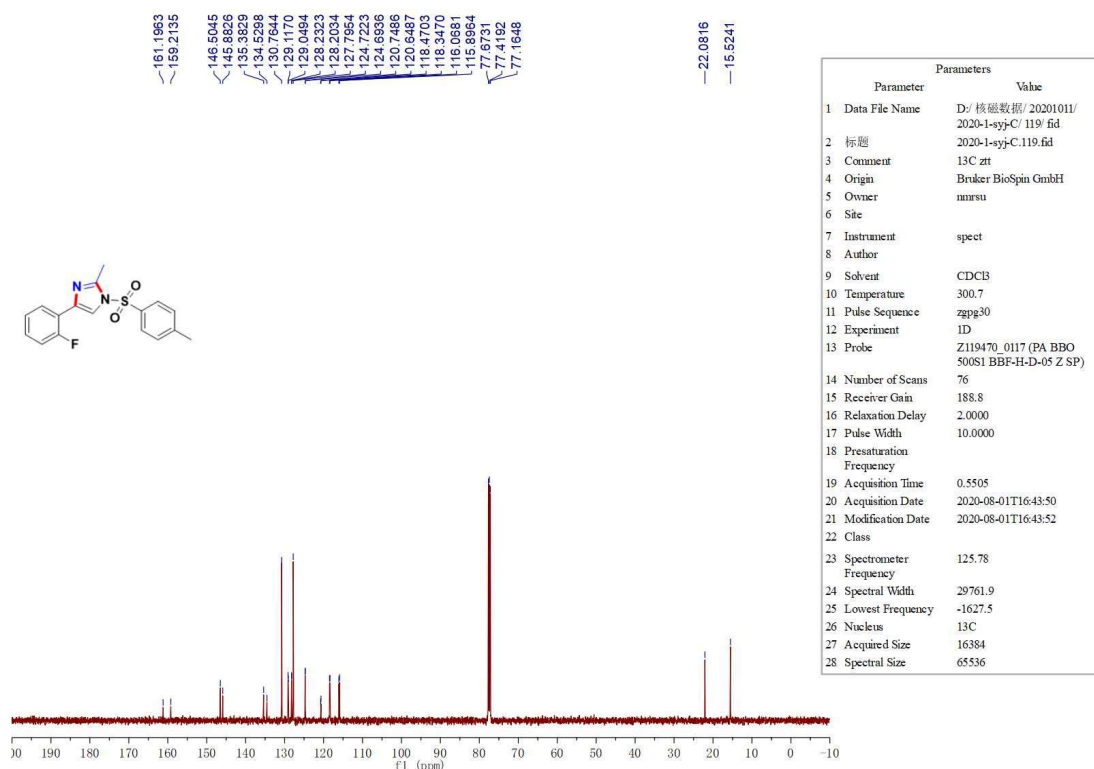

1-((4-Fluorophenyl)sulfonyl)-2-methyl-4-phenyl-1*H*-imidazole (3o)

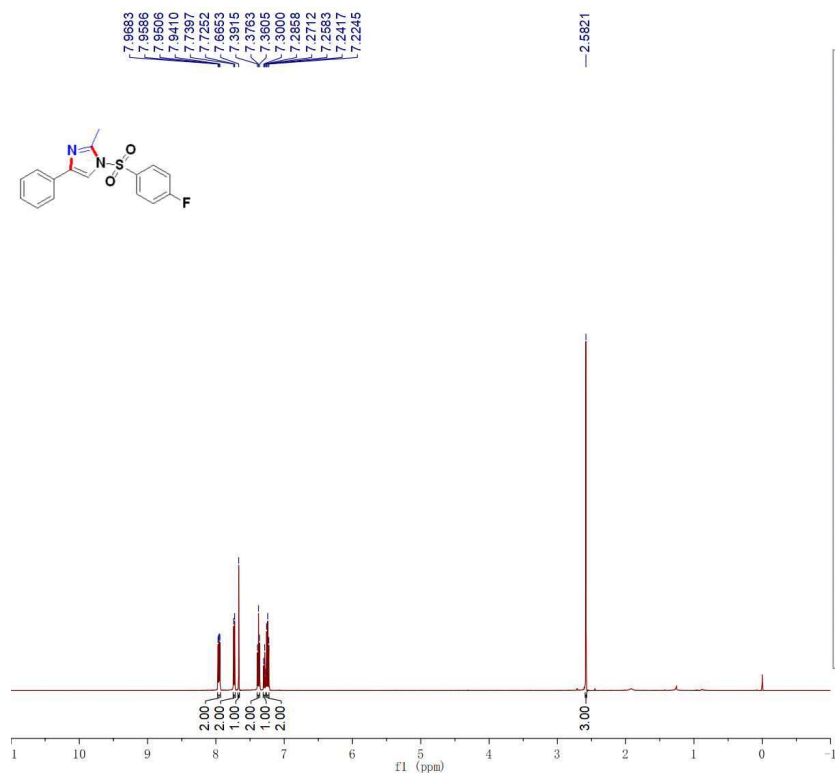

| Parameters                 |                                             |  |
|----------------------------|---------------------------------------------|--|
| Parameter                  | Value                                       |  |
| 1 Data File Name           | D:\ 核磁数据\ nmr\ nmr\ 2020-1-syy-H\ 114.fid   |  |
| 2 标题                       | 2020-1-syy-H.114.fid                        |  |
| 3 Comment                  | 1H ztt                                      |  |
| 4 Origin                   | Bruker BioSpin GmbH                         |  |
| 5 Owner                    | nmrsu                                       |  |
| 6 Site                     |                                             |  |
| 7 Instrument               | spect                                       |  |
| 8 Author                   |                                             |  |
| 9 Solvent                  | CDCl3                                       |  |
| 10 Temperature             | 295.7                                       |  |
| 11 Pulse Sequence          | zg30                                        |  |
| 12 Experiment              | 1D                                          |  |
| 13 Probe                   | Z119470_0117 (PA BBO 500S1 BBR-H-D-05 Z SP) |  |
| 14 Number of Scans         | 2                                           |  |
| 15 Receiver Gain           | 59.2                                        |  |
| 16 Relaxation Delay        | 2.0000                                      |  |
| 17 Pulse Width             | 12.0000                                     |  |
| 18 Presaturation Frequency |                                             |  |
| 19 Acquisition Time        | 1.8175                                      |  |
| 20 Acquisition Date        | 2020-06-01T10:45:16                         |  |
| 21 Modification Date       | 2020-06-01T10:45:18                         |  |
| 22 Class                   |                                             |  |
| 23 Spectrometer Frequency  | 500.16                                      |  |
| 24 Spectral Width          | 9014.4                                      |  |
| 25 Lowest Frequency        | -1519.4                                     |  |
| 26 Nucleus                 | 1H                                          |  |
| 27 Acquired Size           | 16384                                       |  |
| 28 Spectral Size           | 65536                                       |  |

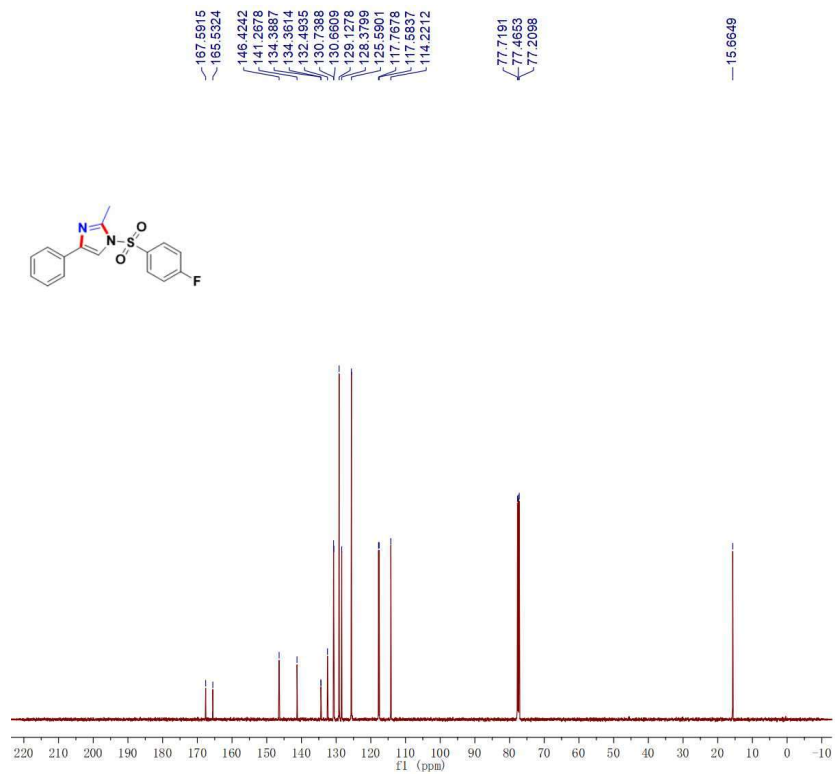

| Parameters                 |                                             |  |
|----------------------------|---------------------------------------------|--|
| Parameter                  | Value                                       |  |
| 1 Data File Name           | D:\ 核磁数据\ nmr\ nmr\ 2020-1-syy-C\ 42.fid    |  |
| 2 标题                       | 2020-1-syy-C.42.fid                         |  |
| 3 Comment                  | 13C ztt                                     |  |
| 4 Origin                   | Bruker BioSpin GmbH                         |  |
| 5 Owner                    | nmrsu                                       |  |
| 6 Site                     |                                             |  |
| 7 Instrument               | spect                                       |  |
| 8 Author                   |                                             |  |
| 9 Solvent                  | CDCl3                                       |  |
| 10 Temperature             | 295.6                                       |  |
| 11 Pulse Sequence          | zgpg30                                      |  |
| 12 Experiment              | 1D                                          |  |
| 13 Probe                   | Z119470_0117 (PA BBO 500S1 BBR-H-D-05 Z SP) |  |
| 14 Number of Scans         | 294                                         |  |
| 15 Receiver Gain           | 188.8                                       |  |
| 16 Relaxation Delay        | 2.0000                                      |  |
| 17 Pulse Width             | 10.0000                                     |  |
| 18 Presaturation Frequency |                                             |  |
| 19 Acquisition Time        | 0.5505                                      |  |
| 20 Acquisition Date        | 2020-06-01T11:00:15                         |  |
| 21 Modification Date       | 2020-06-01T11:00:18                         |  |
| 22 Class                   |                                             |  |
| 23 Spectrometer Frequency  | 125.78                                      |  |
| 24 Spectral Width          | 29761.9                                     |  |
| 25 Lowest Frequency        | -1627.5                                     |  |
| 26 Nucleus                 | 13C                                         |  |
| 27 Acquired Size           | 16384                                       |  |
| 28 Spectral Size           | 65536                                       |  |

# 1-((4-Bromophenyl)sulfonyl)-2-methyl-4-phenyl-1H-imidazole (3p)

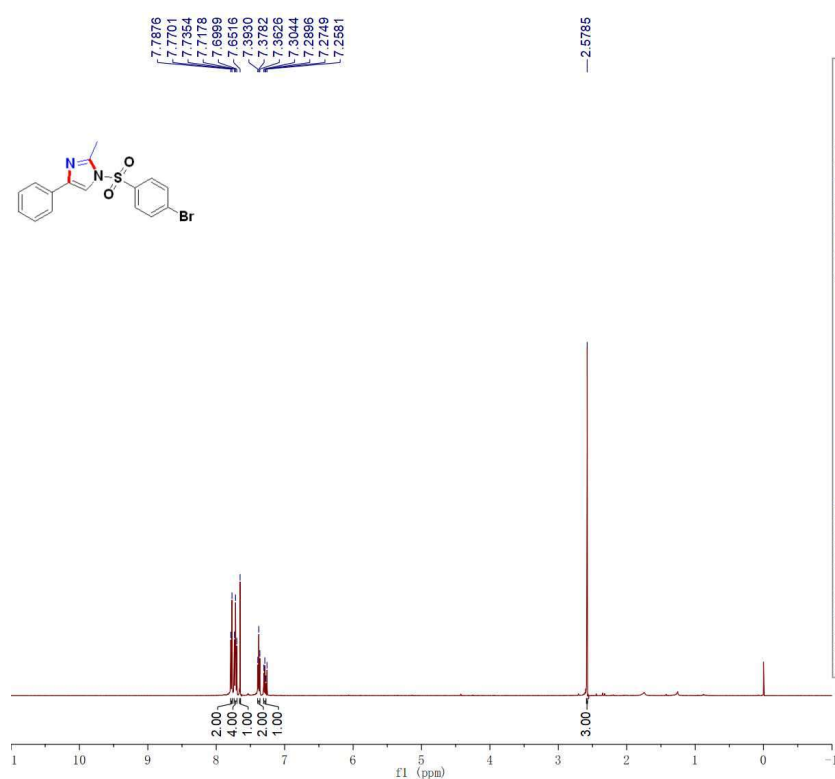

| Parameters                 |                                             |  |
|----------------------------|---------------------------------------------|--|
| Parameter                  | Value                                       |  |
| 1 Data File Name           | D:/ 核磁数据/ nmr/ nmr/ 2020-1-sy-H-113/ fid    |  |
| 2 标题                       | 2020-1-sy-H-113.fid                         |  |
| 3 Comment                  | 1H ztt                                      |  |
| 4 Origin                   | Bruker BioSpin GmbH                         |  |
| 5 Owner                    | nmrsu                                       |  |
| 6 Site                     |                                             |  |
| 7 Instrument               | spect                                       |  |
| 8 Author                   |                                             |  |
| 9 Solvent                  | CDCl3                                       |  |
| 10 Temperature             | 295.6                                       |  |
| 11 Pulse Sequence          | zg30                                        |  |
| 12 Experiment              | 1D                                          |  |
| 13 Probe                   | Z119470_0117 (PA BBO 500S1 BBF-H-D-05 Z SP) |  |
| 14 Number of Scans         | 2                                           |  |
| 15 Receiver Gain           | 87.0                                        |  |
| 16 Relaxation Delay        | 2.0000                                      |  |
| 17 Pulse Width             | 12.0000                                     |  |
| 18 Presaturation Frequency |                                             |  |
| 19 Acquisition Time        | 1.8175                                      |  |
| 20 Acquisition Date        | 2020-06-01T10:36:18                         |  |
| 21 Modification Date       | 2020-06-01T10:36:20                         |  |
| 22 Class                   |                                             |  |
| 23 Spectrometer            | 500.16                                      |  |
| 24 Spectral Width          | 9014.4                                      |  |
| 25 Lowest Frequency        | -1519.4                                     |  |
| 26 Nucleus                 | 1H                                          |  |
| 27 Acquired Size           | 16384                                       |  |
| 28 Spectral Size           | 65536                                       |  |

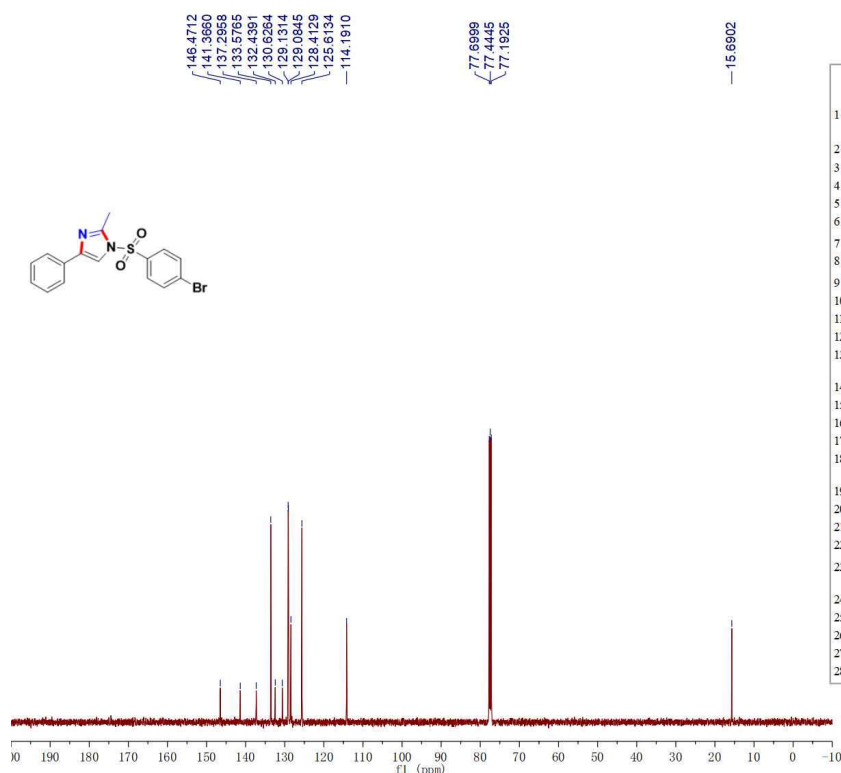

| Parameters                 |                                             |  |
|----------------------------|---------------------------------------------|--|
| Parameter                  | Value                                       |  |
| 1 Data File Name           | D:/ 核磁数据/ nmr/ nmr/ 2020-1-sy-C/ 41/ fid    |  |
| 2 标题                       | 2020-1-sy-C-41.fid                          |  |
| 3 Comment                  | 13C ztt                                     |  |
| 4 Origin                   | Bruker BioSpin GmbH                         |  |
| 5 Owner                    | nmrsu                                       |  |
| 6 Site                     |                                             |  |
| 7 Instrument               | spect                                       |  |
| 8 Author                   |                                             |  |
| 9 Solvent                  | CDCl3                                       |  |
| 10 Temperature             | 295.7                                       |  |
| 11 Pulse Sequence          | zgpg30                                      |  |
| 12 Experiment              | 1D                                          |  |
| 13 Probe                   | Z119470_0117 (PA BBO 500S1 BBF-H-D-05 Z SP) |  |
| 14 Number of Scans         | 100                                         |  |
| 15 Receiver Gain           | 188.8                                       |  |
| 16 Relaxation Delay        | 2.0000                                      |  |
| 17 Pulse Width             | 10.0000                                     |  |
| 18 Presaturation Frequency |                                             |  |
| 19 Acquisition Time        | 0.5505                                      |  |
| 20 Acquisition Date        | 2020-06-01T10:42:46                         |  |
| 21 Modification Date       | 2020-06-01T10:42:48                         |  |
| 22 Class                   |                                             |  |
| 23 Spectrometer            | 125.78                                      |  |
| 24 Spectral Width          | 29761.9                                     |  |
| 25 Lowest Frequency        | -1627.5                                     |  |
| 26 Nucleus                 | 13C                                         |  |
| 27 Acquired Size           | 16384                                       |  |
| 28 Spectral Size           | 65536                                       |  |



## 2-Ethyl-4-phenyl-1-tosyl-1H-imidazole (3q)

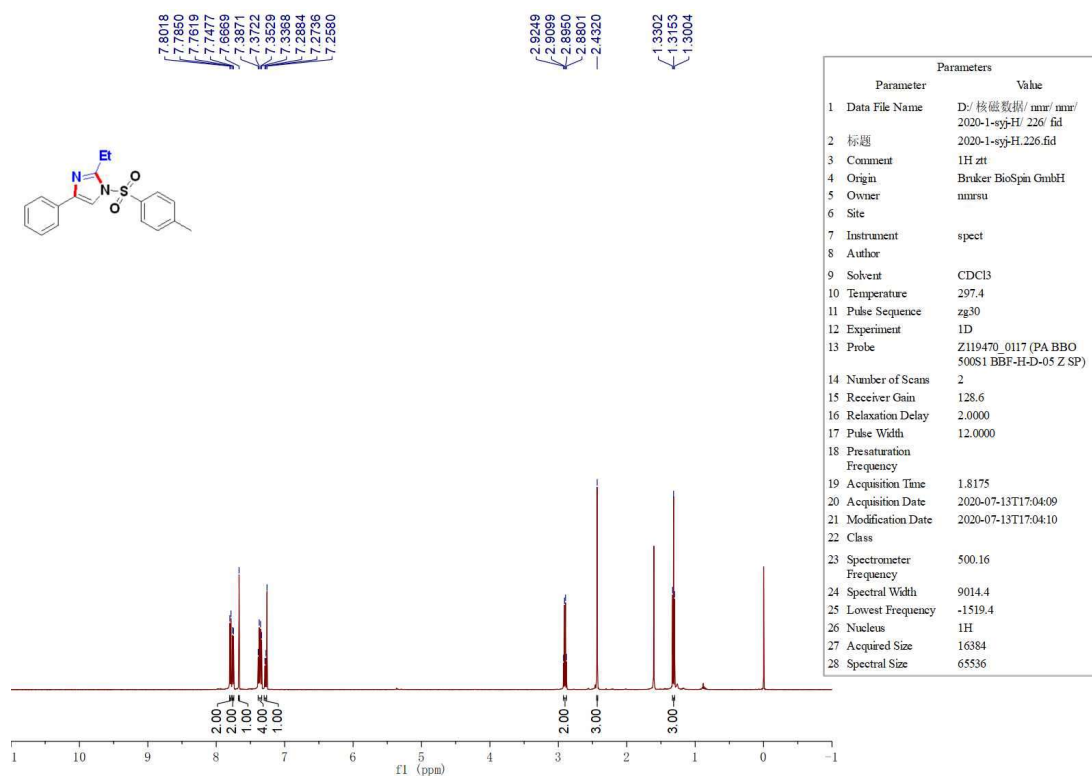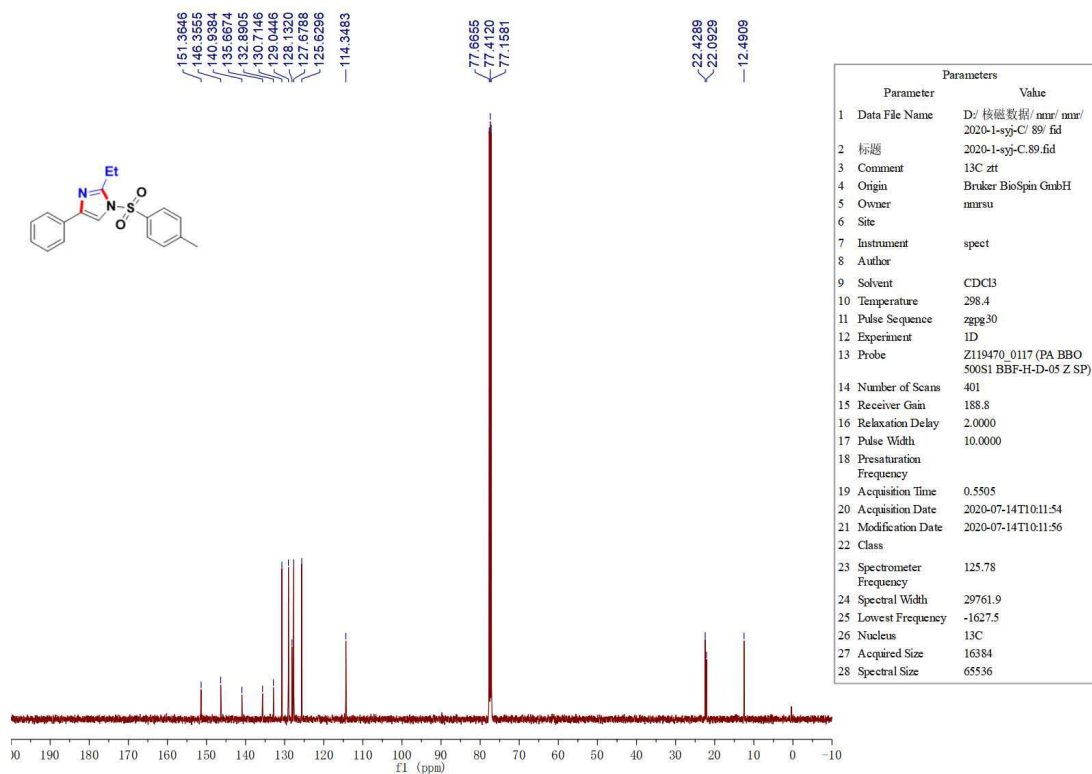



# 4-Phenyl-2-propyl-1-tosyl-1H-imidazole (3r)

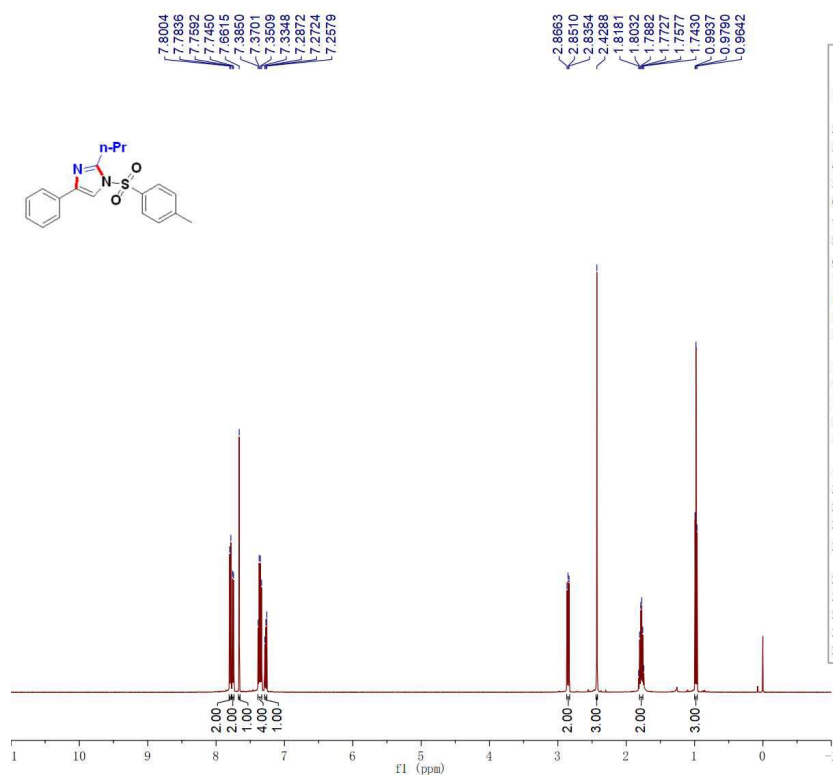

| Parameters                 |                                             |  |
|----------------------------|---------------------------------------------|--|
| Parameter                  | Value                                       |  |
| 1 Data File Name           | D:/ 核磁数据/ nmr/ nmr/ 2020-1-sy-H/ 224/ fid   |  |
| 2 标题                       | 2020-1-sy-H.224.fid                         |  |
| 3 Comment                  | 1H ztt                                      |  |
| 4 Origin                   | Bruker BioSpin GmbH                         |  |
| 5 Owner                    | nmrsu                                       |  |
| 6 Site                     |                                             |  |
| 7 Instrument               | spect                                       |  |
| 8 Author                   |                                             |  |
| 9 Solvent                  | CDCl3                                       |  |
| 10 Temperature             | 297.4                                       |  |
| 11 Pulse Sequence          | zg30                                        |  |
| 12 Experiment              | 1D                                          |  |
| 13 Probe                   | Z119470_0117 (PA BBO 500S1 BBF-H-D-05 Z SP) |  |
| 14 Number of Scans         | 2                                           |  |
| 15 Receiver Gain           | 66.5                                        |  |
| 16 Relaxation Delay        | 2.0000                                      |  |
| 17 Pulse Width             | 12.0000                                     |  |
| 18 Presaturation Frequency |                                             |  |
| 19 Acquisition Time        | 1.8175                                      |  |
| 20 Acquisition Date        | 2020-07-13T16:48:36                         |  |
| 21 Modification Date       | 2020-07-13T16:48:38                         |  |
| 22 Class                   |                                             |  |
| 23 Spectrometer Frequency  | 500.16                                      |  |
| 24 Spectral Width          | 9014.4                                      |  |
| 25 Lowest Frequency        | -1519.4                                     |  |
| 26 Nucleus                 | 1H                                          |  |
| 27 Acquired Size           | 16384                                       |  |
| 28 Spectral Size           | 65536                                       |  |

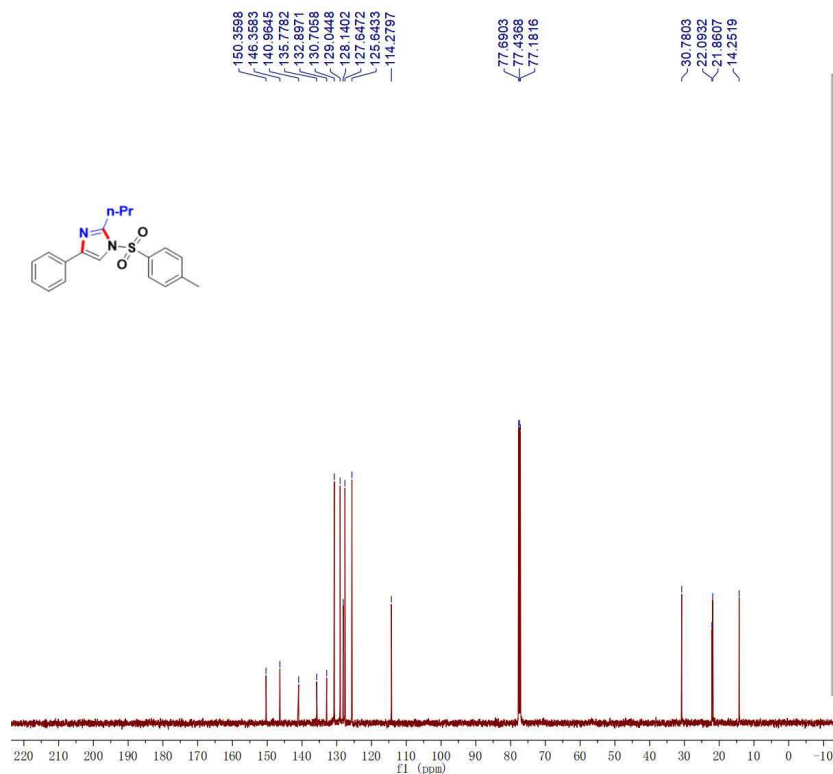

| Parameters                 |                                             |  |
|----------------------------|---------------------------------------------|--|
| Parameter                  | Value                                       |  |
| 1 Data File Name           | D:/ 核磁数据/ nmr/ nmr/ 2020-1-sy-C/ 87/ fid    |  |
| 2 标题                       | 2020-1-sy-C.87.fid                          |  |
| 3 Comment                  | 13C ztt                                     |  |
| 4 Origin                   | Bruker BioSpin GmbH                         |  |
| 5 Owner                    | nmrsu                                       |  |
| 6 Site                     |                                             |  |
| 7 Instrument               | spect                                       |  |
| 8 Author                   |                                             |  |
| 9 Solvent                  | CDCl3                                       |  |
| 10 Temperature             | 297.9                                       |  |
| 11 Pulse Sequence          | zgpg30                                      |  |
| 12 Experiment              | 1D                                          |  |
| 13 Probe                   | Z119470_0117 (PA BBO 500S1 BBF-H-D-05 Z SP) |  |
| 14 Number of Scans         | 100                                         |  |
| 15 Receiver Gain           | 188.8                                       |  |
| 16 Relaxation Delay        | 2.0000                                      |  |
| 17 Pulse Width             | 10.0000                                     |  |
| 18 Presaturation Frequency |                                             |  |
| 19 Acquisition Time        | 0.5505                                      |  |
| 20 Acquisition Date        | 2020-07-14T09:18:30                         |  |
| 21 Modification Date       | 2020-07-14T09:18:32                         |  |
| 22 Class                   |                                             |  |
| 23 Spectrometer Frequency  | 125.78                                      |  |
| 24 Spectral Width          | 29761.9                                     |  |
| 25 Lowest Frequency        | -1627.5                                     |  |
| 26 Nucleus                 | 13C                                         |  |
| 27 Acquired Size           | 16384                                       |  |
| 28 Spectral Size           | 65536                                       |  |

2-Butyl-4-phenyl-1-tosyl-1H-imidazole (3s)

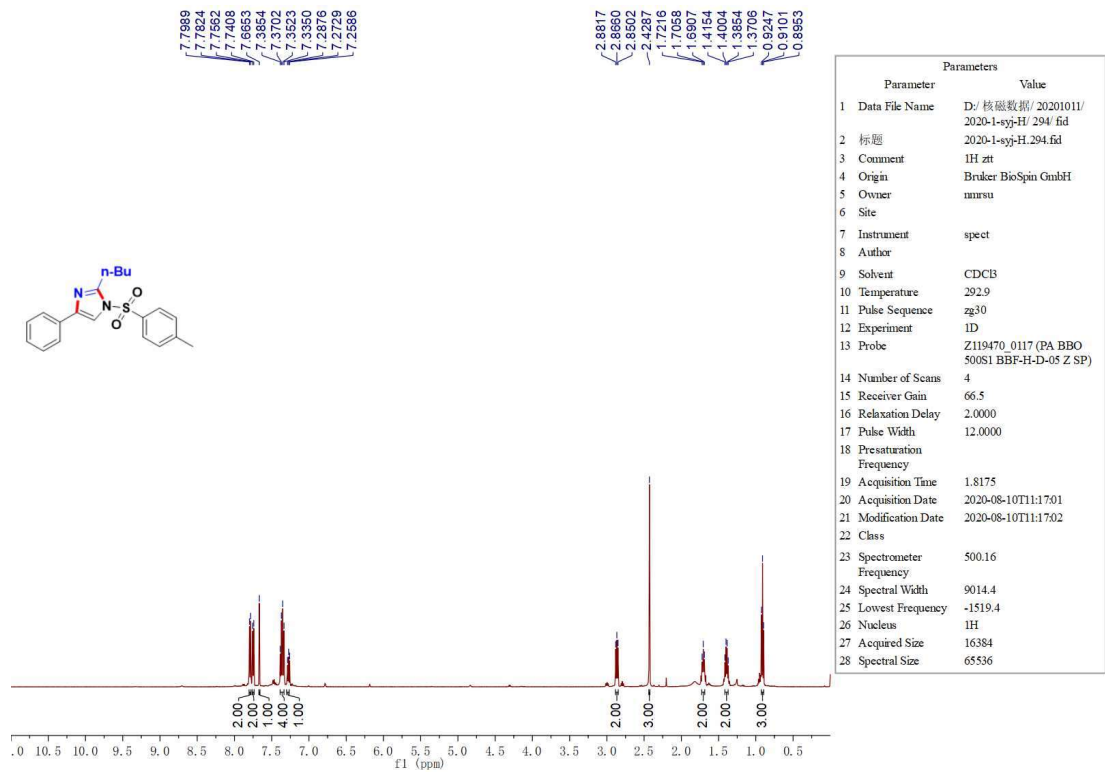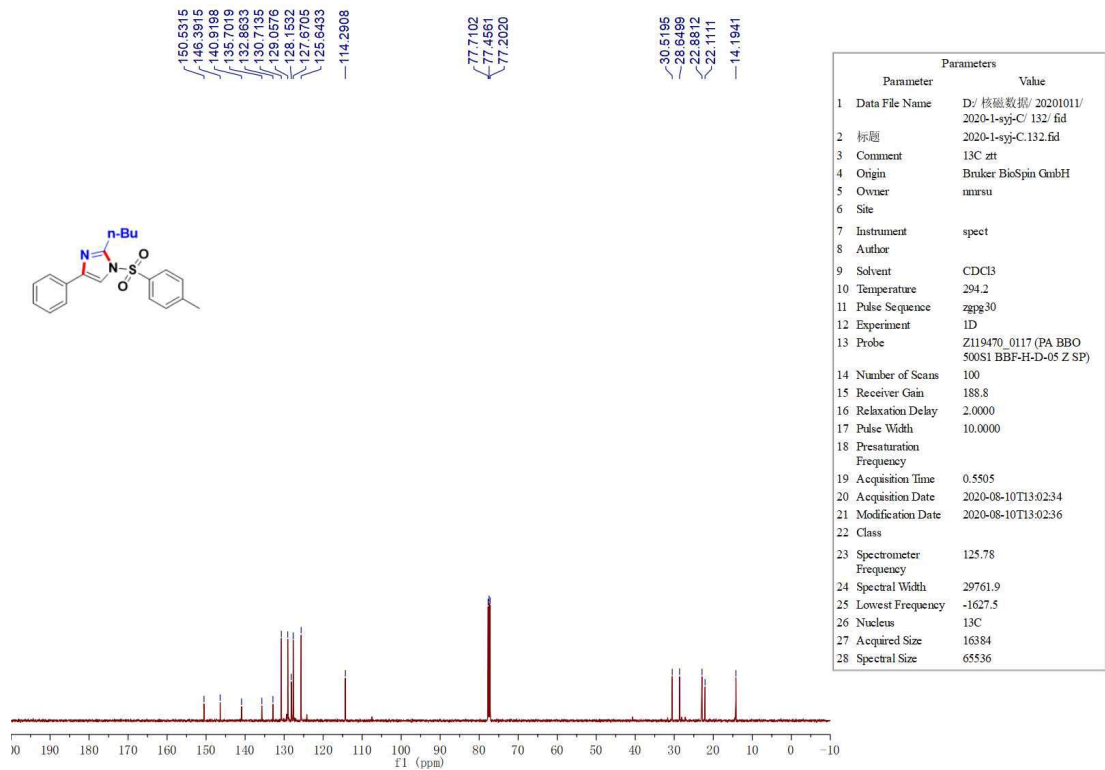

(2,5-Diphenyl-1H-pyrrol-3-yl)(phenyl)methanone (5a)

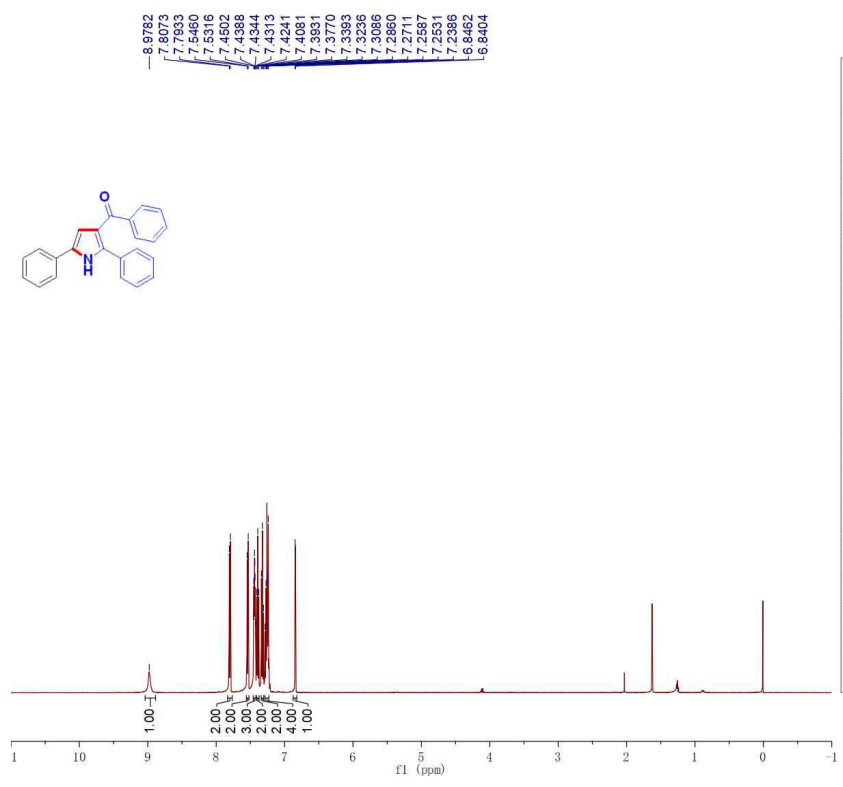

| Parameters                 |                                                 |  |
|----------------------------|-------------------------------------------------|--|
| Parameter                  | Value                                           |  |
| 1 Data File Name           | D:/ 核磁数据/ 500M- NMR-date/ 2019-1-lxw-H/ 332.fid |  |
| 2 标题                       | 2019-1-lxw-H.332.fid                            |  |
| 3 Comment                  | 1H                                              |  |
| 4 Origin                   | Bruker BioSpin GmbH                             |  |
| 5 Owner                    | root                                            |  |
| 6 Site                     |                                                 |  |
| 7 Instrument               | spect                                           |  |
| 8 Author                   |                                                 |  |
| 9 Solvent                  | CDCl3                                           |  |
| 10 Temperature             | 295.2                                           |  |
| 11 Pulse Sequence          | zg30                                            |  |
| 12 Experiment              | 1D                                              |  |
| 13 Probe                   | Z119470_0117 (PA BBO 500S1 BBF-H-D-05 Z SP)     |  |
| 14 Number of Scans         | 2                                               |  |
| 15 Receiver Gain           | 76.5                                            |  |
| 16 Relaxation Delay        | 2.0000                                          |  |
| 17 Pulse Width             | 12.0000                                         |  |
| 18 Presaturation Frequency |                                                 |  |
| 19 Acquisition Time        | 1.8175                                          |  |
| 20 Acquisition Date        | 2019-11-29T11:27:38                             |  |
| 21 Modification Date       | 2019-11-29T11:27:40                             |  |
| 22 Class                   |                                                 |  |
| 23 Spectrometer Frequency  | 500.16                                          |  |
| 24 Spectral Width          | 9014.4                                          |  |
| 25 Lowest Frequency        | -1518.8                                         |  |
| 26 Nucleus                 | 1H                                              |  |
| 27 Acquired Size           | 16384                                           |  |
| 28 Spectral Size           | 65536                                           |  |

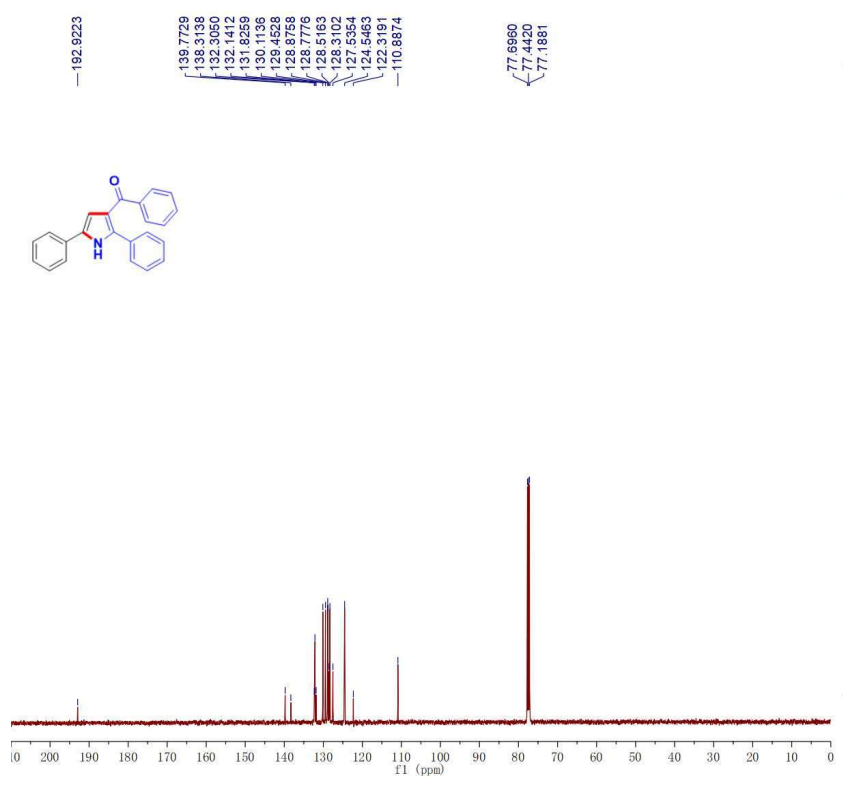

| Parameters                 |                                                 |  |
|----------------------------|-------------------------------------------------|--|
| Parameter                  | Value                                           |  |
| 1 Data File Name           | D:/ 核磁数据/ 500M- NMR-date/ 2019-1-lxw-C/ 255.fid |  |
| 2 标题                       | 2019-1-lxw-C.255.fid                            |  |
| 3 Comment                  | 13C                                             |  |
| 4 Origin                   | Bruker BioSpin GmbH                             |  |
| 5 Owner                    | root                                            |  |
| 6 Site                     |                                                 |  |
| 7 Instrument               | spect                                           |  |
| 8 Author                   |                                                 |  |
| 9 Solvent                  | CDCl3                                           |  |
| 10 Temperature             | 295.2                                           |  |
| 11 Pulse Sequence          | zgpg30                                          |  |
| 12 Experiment              | 1D                                              |  |
| 13 Probe                   | Z119470_0117 (PA BBO 500S1 BBF-H-D-05 Z SP)     |  |
| 14 Number of Scans         | 151                                             |  |
| 15 Receiver Gain           | 188.8                                           |  |
| 16 Relaxation Delay        | 2.0000                                          |  |
| 17 Pulse Width             | 10.0000                                         |  |
| 18 Presaturation Frequency |                                                 |  |
| 19 Acquisition Time        | 0.5505                                          |  |
| 20 Acquisition Date        | 2019-11-29T11:37:06                             |  |
| 21 Modification Date       | 2019-11-29T11:37:08                             |  |
| 22 Class                   |                                                 |  |
| 23 Spectrometer Frequency  | 125.78                                          |  |
| 24 Spectral Width          | 29761.9                                         |  |
| 25 Lowest Frequency        | -1627.5                                         |  |
| 26 Nucleus                 | 13C                                             |  |
| 27 Acquired Size           | 16384                                           |  |
| 28 Spectral Size           | 65536                                           |  |

# Phenyl(2-phenyl-5-(*p*-tolyl)-1*H*-pyrrol-3-yl)methanone (5b)

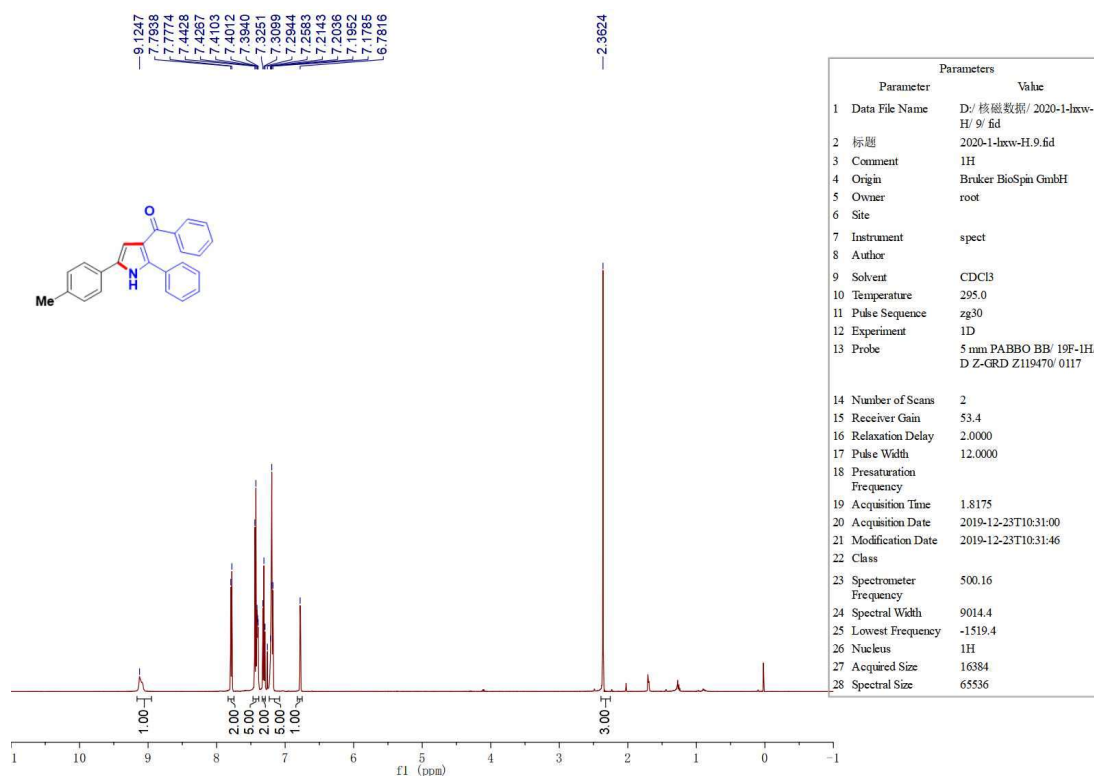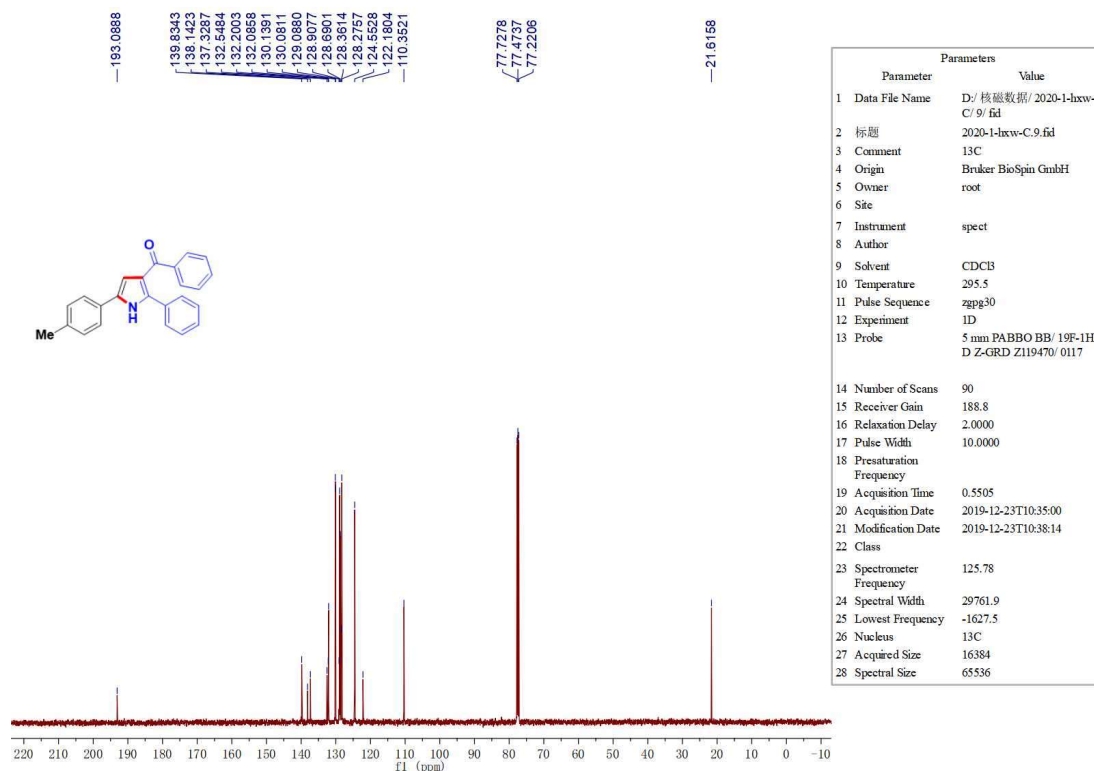

# (5-(4-Ethylphenyl)-2-phenyl-1*H*-pyrrol-3-yl)(phenyl)methanone (5c)

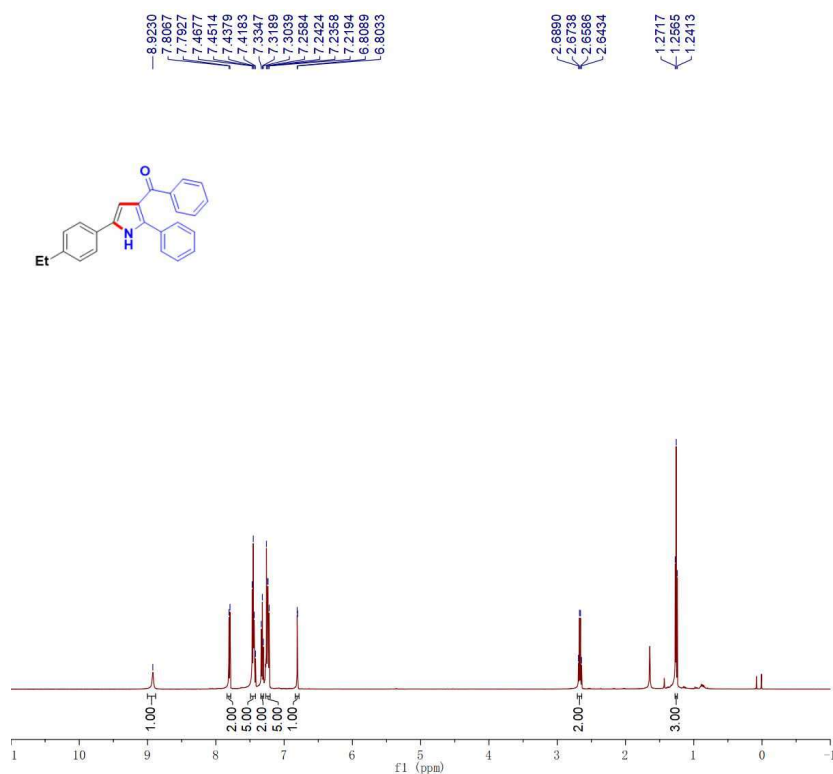

| Parameters                 |                                             |
|----------------------------|---------------------------------------------|
| Parameter                  | Value                                       |
| 1 Data File Name           | D:/ 核磁数据/ 20201011/ 2020-1-yyj-H/ 313/ fid  |
| 2 标题                       | 2020-1-yyj-H-313.fid                        |
| 3 Comment                  | 1H zsw                                      |
| 4 Origin                   | Bruker BioSpin GmbH                         |
| 5 Owner                    | nmsu                                        |
| 6 Site                     |                                             |
| 7 Instrument               | spect                                       |
| 8 Author                   |                                             |
| 9 Solvent                  | CDCl3                                       |
| 10 Temperature             | 296.5                                       |
| 11 Pulse Sequence          | zg30                                        |
| 12 Experiment              | 1D                                          |
| 13 Probe                   | Z119470_0117 (PA BBO 500S1 BBF-H-D-05 Z SP) |
| 14 Number of Scans         | 4                                           |
| 15 Receiver Gain           | 95.4                                        |
| 16 Relaxation Delay        | 2.0000                                      |
| 17 Pulse Width             | 12.0000                                     |
| 18 Presaturation Frequency |                                             |
| 19 Acquisition Time        | 1.8175                                      |
| 20 Acquisition Date        | 2020-08-16T09:50:00                         |
| 21 Modification Date       | 2020-08-16T09:50:02                         |
| 22 Class                   |                                             |
| 23 Spectrometer Frequency  | 500.16                                      |
| 24 Spectral Width          | 9014.4                                      |
| 25 Lowest Frequency        | -1519.4                                     |
| 26 Nucleus                 | 1H                                          |
| 27 Acquired Size           | 16384                                       |
| 28 Spectral Size           | 65536                                       |

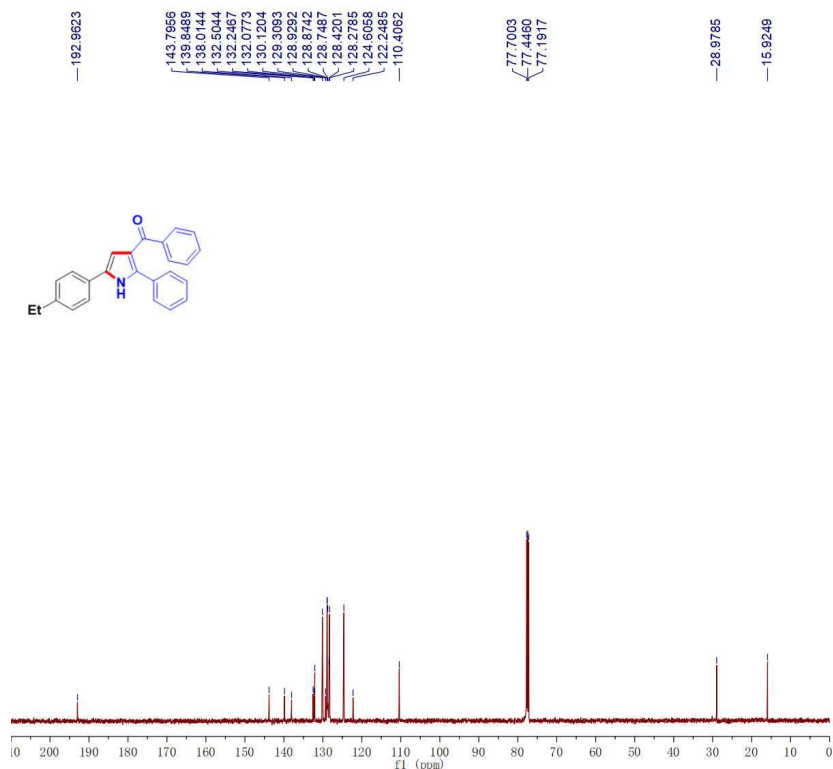

| Parameters                 |                                             |
|----------------------------|---------------------------------------------|
| Parameter                  | Value                                       |
| 1 Data File Name           | D:/ 核磁数据/ 20201011/ 2020-1-yyj-C/ 145/ fid  |
| 2 标题                       | 2020-1-yyj-C-145.fid                        |
| 3 Comment                  | 13C ztt                                     |
| 4 Origin                   | Bruker BioSpin GmbH                         |
| 5 Owner                    | nmsu                                        |
| 6 Site                     |                                             |
| 7 Instrument               | spect                                       |
| 8 Author                   |                                             |
| 9 Solvent                  | CDCl3                                       |
| 10 Temperature             | 297.1                                       |
| 11 Pulse Sequence          | zgpg30                                      |
| 12 Experiment              | 1D                                          |
| 13 Probe                   | Z119470_0117 (PA BBO 500S1 BBF-H-D-05 Z SP) |
| 14 Number of Scans         | 140                                         |
| 15 Receiver Gain           | 188.8                                       |
| 16 Relaxation Delay        | 2.0000                                      |
| 17 Pulse Width             | 10.0000                                     |
| 18 Presaturation Frequency |                                             |
| 19 Acquisition Time        | 0.5505                                      |
| 20 Acquisition Date        | 2020-08-18T10:12:04                         |
| 21 Modification Date       | 2020-08-18T10:12:06                         |
| 22 Class                   |                                             |
| 23 Spectrometer Frequency  | 125.78                                      |
| 24 Spectral Width          | 29761.9                                     |
| 25 Lowest Frequency        | -1627.5                                     |
| 26 Nucleus                 | 13C                                         |
| 27 Acquired Size           | 16384                                       |
| 28 Spectral Size           | 65536                                       |

(5-(4-Methoxyphenyl)-2-phenyl-1*H*-pyrrol-3-yl)(phenyl)methanone (5d)

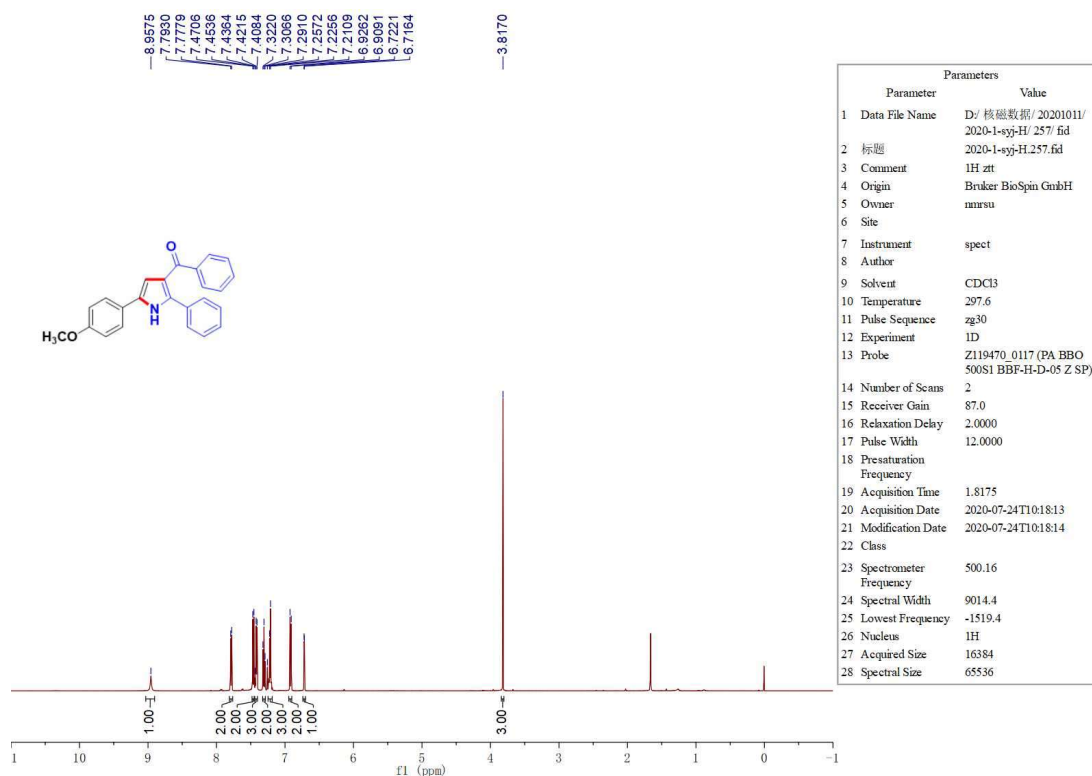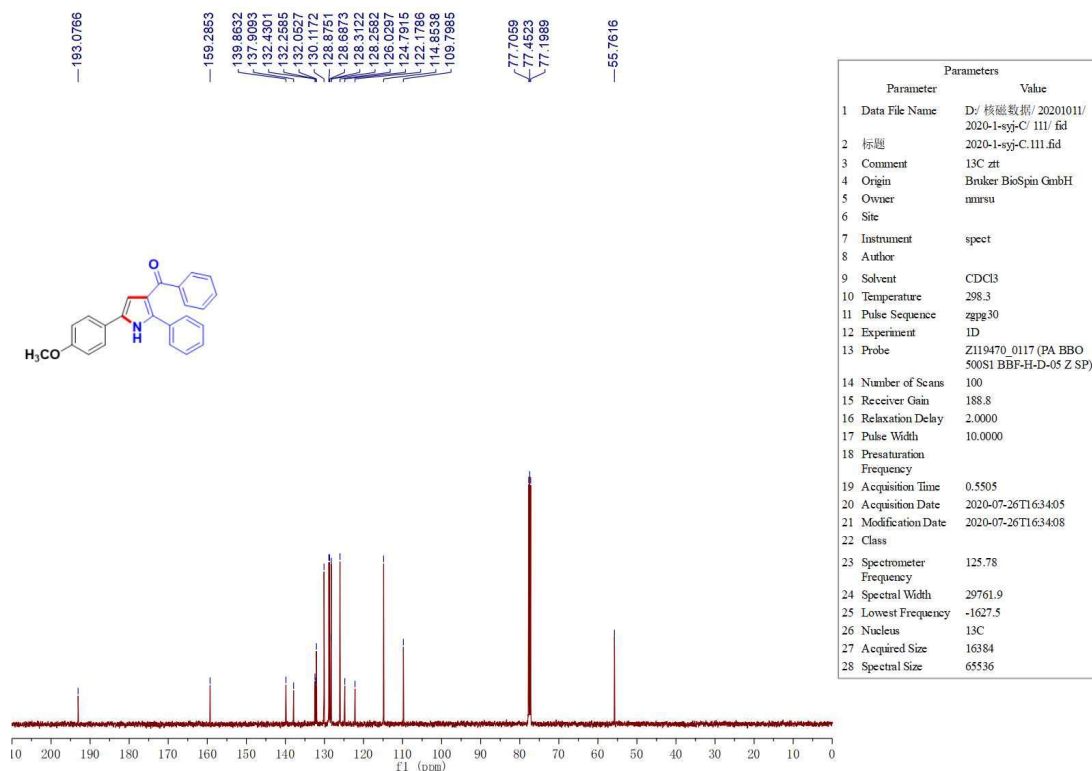

(5-(4-Fluorophenyl)-2-phenyl-1H-pyrrol-3-yl)(phenyl)methanone (5e)

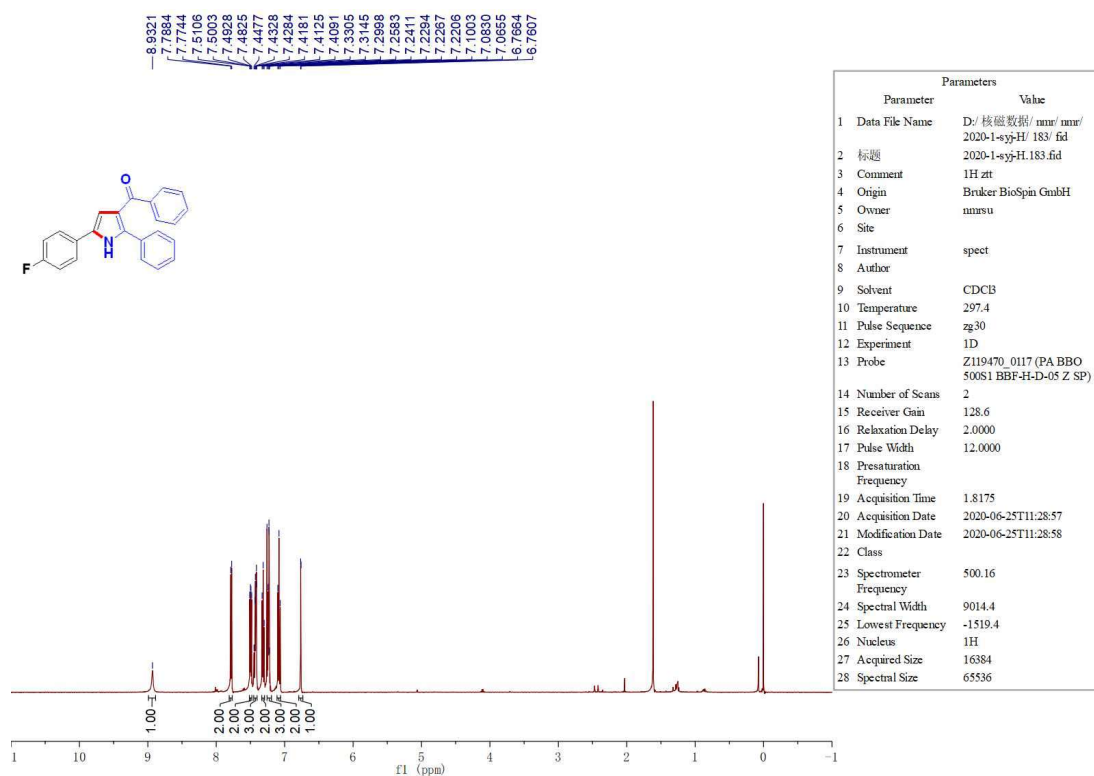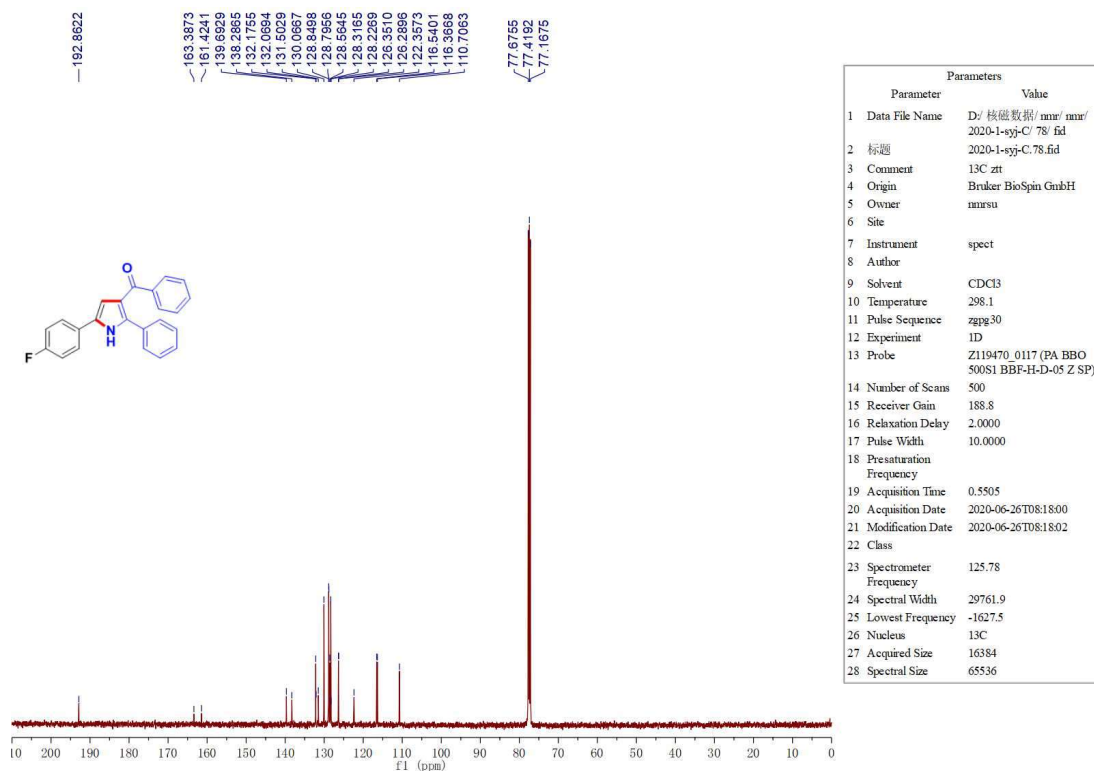



(5-(4-Chlorophenyl)-2-phenyl-1H-pyrrol-3-yl)(phenyl)methanone (5f)

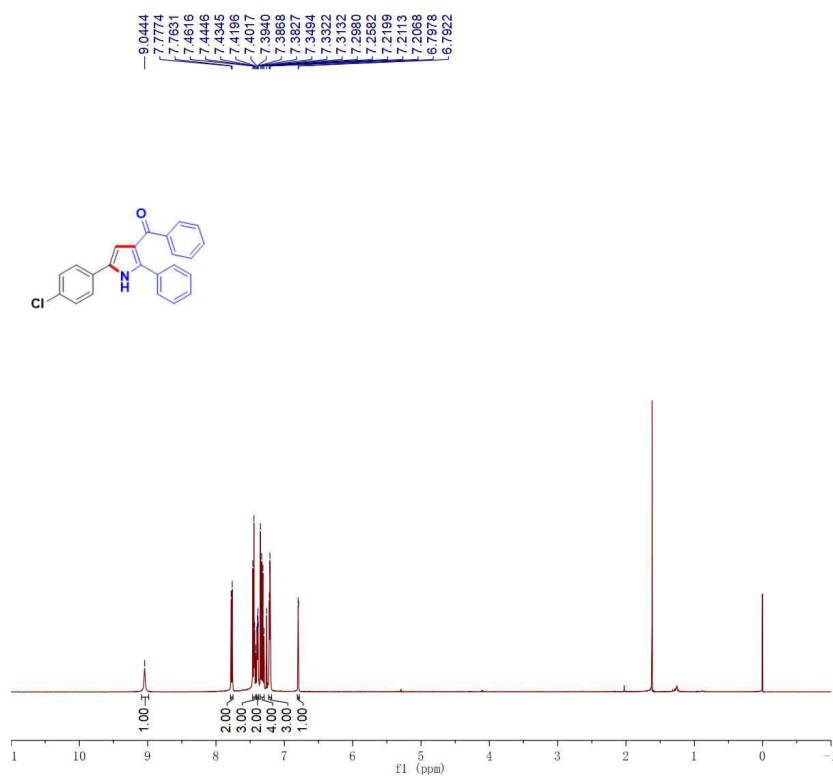

| Parameters                 |                                             |
|----------------------------|---------------------------------------------|
| Parameter                  | Value                                       |
| 1 Data File Name           | D:/ 核磁数据/ 20201011/ 2020-1-sy3-H/ 267.fid   |
| 2 标题                       | 2020-1-sy3-H.267.fid                        |
| 3 Comment                  | 1H ztt                                      |
| 4 Origin                   | Braker BioSpin GmbH                         |
| 5 Owner                    | nmrsu                                       |
| 6 Site                     |                                             |
| 7 Instrument               | spect                                       |
| 8 Author                   |                                             |
| 9 Solvent                  | CDCl3                                       |
| 10 Temperature             | 297.4                                       |
| 11 Pulse Sequence          | zg30                                        |
| 12 Experiment              | 1D                                          |
| 13 Probe                   | Z119470_0117 (PA BBO 500S1 BBF-H-D-05 Z SP) |
| 14 Number of Scans         | 2                                           |
| 15 Receiver Gain           | 114.1                                       |
| 16 Relaxation Delay        | 2.0000                                      |
| 17 Pulse Width             | 12.0000                                     |
| 18 Presaturation Frequency |                                             |
| 19 Acquisition Time        | 1.8175                                      |
| 20 Acquisition Date        | 2020-07-26T11:37:31                         |
| 21 Modification Date       | 2020-07-26T11:37:32                         |
| 22 Class                   |                                             |
| 23 Spectrometer Frequency  | 500.16                                      |
| 24 Spectral Width          | 9014.4                                      |
| 25 Lowest Frequency        | -1519.4                                     |
| 26 Nucleus                 | 1H                                          |
| 27 Acquired Size           | 16384                                       |
| 28 Spectral Size           | 65536                                       |

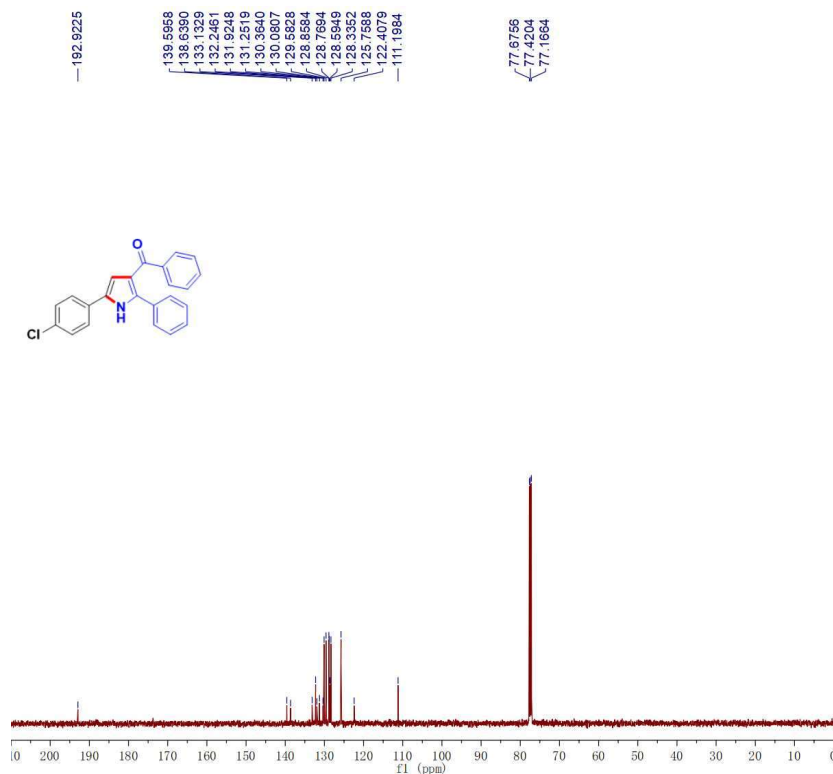

| Parameters                 |                                             |
|----------------------------|---------------------------------------------|
| Parameter                  | Value                                       |
| 1 Data File Name           | D:/ 核磁数据/ 20201011/ 2020-1-sy3-C/ 114.fid   |
| 2 标题                       | 2020-1-sy3-C.114.fid                        |
| 3 Comment                  | 13C ztt                                     |
| 4 Origin                   | Braker BioSpin GmbH                         |
| 5 Owner                    | nmrsu                                       |
| 6 Site                     |                                             |
| 7 Instrument               | spect                                       |
| 8 Author                   |                                             |
| 9 Solvent                  | CDCl3                                       |
| 10 Temperature             | 298.3                                       |
| 11 Pulse Sequence          | zgpg30                                      |
| 12 Experiment              | 1D                                          |
| 13 Probe                   | Z119470_0117 (PA BBO 500S1 BBF-H-D-05 Z SP) |
| 14 Number of Scans         | 83                                          |
| 15 Receiver Gain           | 188.8                                       |
| 16 Relaxation Delay        | 2.0000                                      |
| 17 Pulse Width             | 10.0000                                     |
| 18 Presaturation Frequency |                                             |
| 19 Acquisition Time        | 0.5505                                      |
| 20 Acquisition Date        | 2020-07-26T16:59:52                         |
| 21 Modification Date       | 2020-07-26T16:59:54                         |
| 22 Class                   |                                             |
| 23 Spectrometer Frequency  | 125.78                                      |
| 24 Spectral Width          | 29761.9                                     |
| 25 Lowest Frequency        | -1627.5                                     |
| 26 Nucleus                 | 13C                                         |
| 27 Acquired Size           | 16384                                       |
| 28 Spectral Size           | 65536                                       |



Chemical structure of 4-bromo-1-(4-phenyl-1H-indol-3-yl)-1H-pyrrole-2-carbonylbenzene is shown. The <sup>1</sup>H NMR spectrum (CDCl<sub>3</sub>) displays peaks in the aromatic region (6.8-8.8 ppm) and a reference peak at 0 ppm. Integration values are provided below the peaks.

| Chemical Shift (ppm) | Integration |
|----------------------|-------------|
| ~8.8                 | 1.00        |
| ~7.8                 | 2.00        |
| ~7.6                 | 2.00        |
| ~7.5                 | 3.00        |
| ~7.4                 | 2.00        |
| ~7.3                 | 2.00        |
| ~7.2                 | 2.00        |
| ~7.1                 | 3.00        |
| ~7.0                 | 2.00        |
| ~6.9                 | 1.00        |
| 0                    | -           |

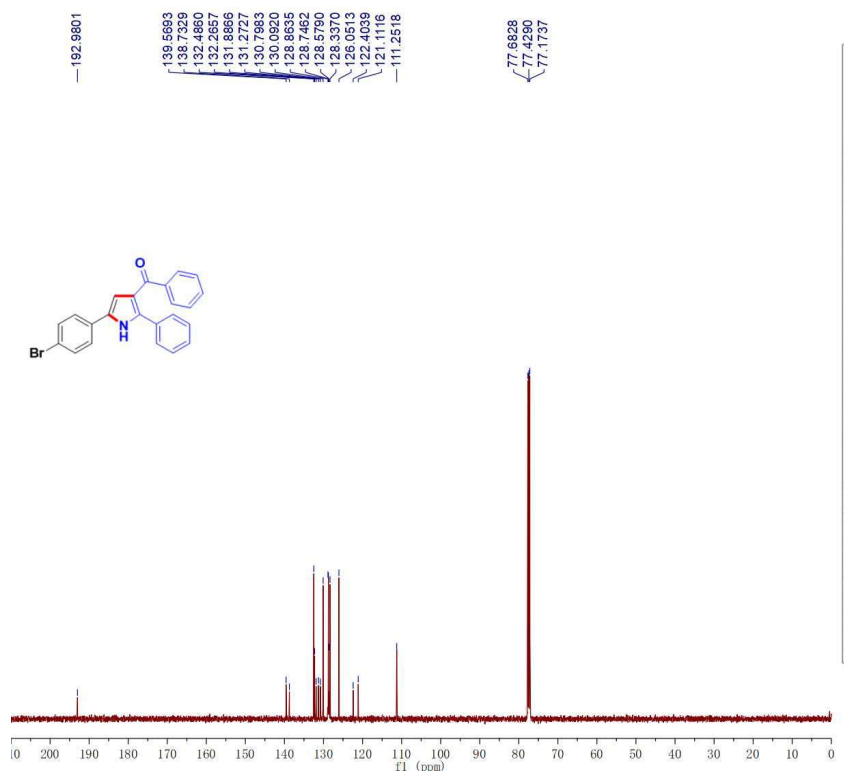

| Parameters |                          |                                             |
|------------|--------------------------|---------------------------------------------|
|            | Parameter                | Value                                       |
| 1          | Data File Name           | D:/核磁数据/nmr/nmr/2020-1-yy-H/127.fid         |
| 2          | 标题                       | 2020-1-yy-H.127.fid                         |
| 3          | Comment                  | 1H ztt                                      |
| 4          | Origin                   | Bruker BioSpin GmbH                         |
| 5          | Owner                    | nmrsu                                       |
| 6          | Site                     |                                             |
| 7          | Instrument               | spect                                       |
| 8          | Author                   |                                             |
| 9          | Solvent                  | CDC13                                       |
| 10         | Temperature              | 297.2                                       |
| 11         | Pulse Sequence           | zg30                                        |
| 12         | Experiment               | 1D                                          |
| 13         | Probe                    | Z119470_0117 (PA BBO 500S1 BBF-H-D-05 Z SP) |
| 14         | Number of Scans          | 2                                           |
| 15         | Receiver Gain            | 188.8                                       |
| 16         | Relaxation Delay         | 2.0000                                      |
| 17         | Pulse Width              | 12.0000                                     |
| 18         | Prestaturation Frequency |                                             |
| 19         | Acquisition Time         | 1.8175                                      |
| 20         | Acquisition Date         | 2020-06-04T12:55:35                         |
| 21         | Modification Date        | 2020-06-04T12:55:36                         |
| 22         | Class                    |                                             |
| 23         | Spectrometer Frequency   | 500.16                                      |
| 24         | Spectral Width           | 9014.4                                      |
| 25         | Lowest Frequency         | -1519.4                                     |
| 26         | Nucleus                  | 1H                                          |
| 27         | Acquired Size            | 16384                                       |
| 28         | Spectral Size            | 65536                                       |

| Parameters |                          |                                            |
|------------|--------------------------|--------------------------------------------|
|            | Parameter                | Value                                      |
| 1          | Data File Name           | D:\核磁数据\mmr\mmr\2020-1-xyj-C\51.fid        |
| 2          | 标题                       | 2020-1-xyj-C.51.fid                        |
| 3          | Comment                  | 13C ztt                                    |
| 4          | Origin                   | Braker BioSpin GmbH                        |
| 5          | Owner                    | mmrnu                                      |
| 6          | Site                     |                                            |
| 7          | Instrument               | spect                                      |
| 8          | Author                   |                                            |
| 9          | Solvent                  | CDCl3                                      |
| 10         | Temperature              | 298.0                                      |
| 11         | Pulse Sequence           | zgpg30                                     |
| 12         | Experiment               | 1D                                         |
| 13         | Probe                    | Z119470_0117 (PA BBO 500S1 BBF-H-D-05 Z SP |
| 14         | Number of Scans          | 201                                        |
| 15         | Receiver Gain            | 188.8                                      |
| 16         | Relaxation Delay         | 2.0000                                     |
| 17         | Pulse Width              | 10.0000                                    |
| 18         | Prestaturation Frequency |                                            |
| 19         | Acquisition Time         | 0.5505                                     |
| 20         | Acquisition Date         | 2020-06-05T12:23:03                        |
| 21         | Modification Date        | 2020-06-05T12:23:06                        |
| 22         | Class                    |                                            |
| 23         | Spectrometer Frequency   | 125.78                                     |
| 24         | Spectral Width           | 29761.9                                    |
| 25         | Lowest Frequency         | -1627.5                                    |
| 26         | Nucleus                  | 13C                                        |
| 27         | Acquired Size            | 16384                                      |
| 28         | Spectral Size            | 65536                                      |

(5-(4-(*tert*-Butyl)phenyl)-2-phenyl-1*H*-pyrrol-3-yl)(phenyl)methanone (**5h**)

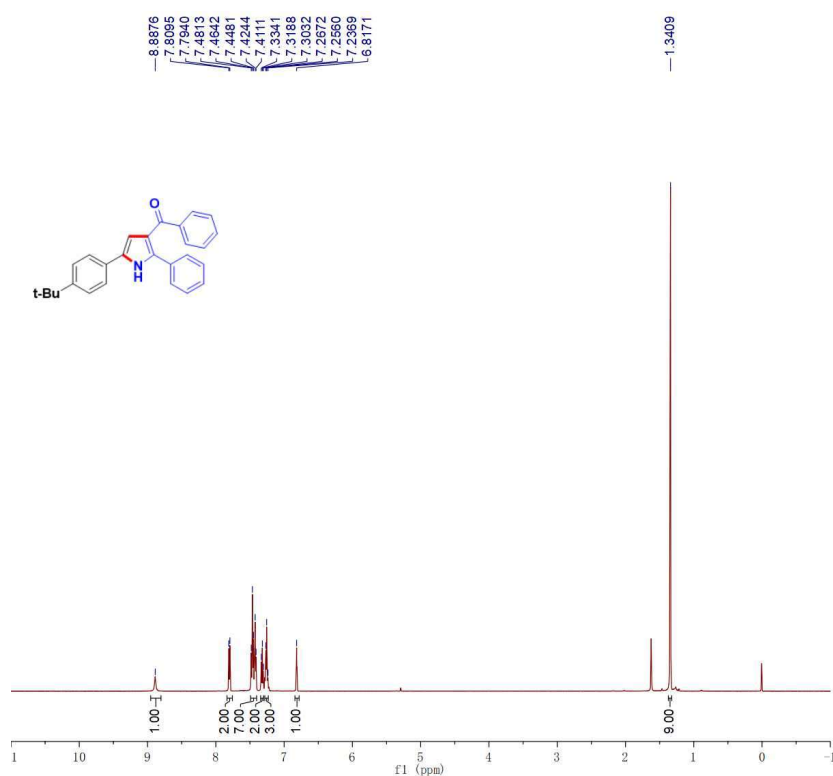

| Parameters                 |                                             |  |
|----------------------------|---------------------------------------------|--|
| Parameter                  | Value                                       |  |
| 1 Data File Name           | D:/ 核磁数据/ 20201011/                         |  |
| 2 标题                       | 2020-1-sy-H-268.fid                         |  |
| 3 Comment                  | 1H ztt                                      |  |
| 4 Origin                   | Bruker BioSpin CnubH                        |  |
| 5 Owner                    | nmrsu                                       |  |
| 6 Site                     |                                             |  |
| 7 Instrument               | spect                                       |  |
| 8 Author                   |                                             |  |
| 9 Solvent                  | CDCl <sub>3</sub>                           |  |
| 10 Temperature             | 297.4                                       |  |
| 11 Pulse Sequence          | zg30                                        |  |
| 12 Experiment              | 1D                                          |  |
| 13 Probe                   | Z119470_0117 (PA BBO 500S1 BBF-H-D-05 Z SP) |  |
| 14 Number of Scans         | 2                                           |  |
| 15 Receiver Gain           | 87.0                                        |  |
| 16 Relaxation Delay        | 2.0000                                      |  |
| 17 Pulse Width             | 12.0000                                     |  |
| 18 Presaturation Frequency |                                             |  |
| 19 Acquisition Time        | 1.8175                                      |  |
| 20 Acquisition Date        | 2020-07-26T11:42:58                         |  |
| 21 Modification Date       | 2020-07-26T11:43:00                         |  |
| 22 Class                   |                                             |  |
| 23 Spectrometer Frequency  | 500.16                                      |  |
| 24 Spectral Width          | 9014.4                                      |  |
| 25 Lowest Frequency        | -1519.4                                     |  |
| 26 Nucleus                 | 1H                                          |  |
| 27 Acquired Size           | 16384                                       |  |
| 28 Spectral Size           | 65536                                       |  |

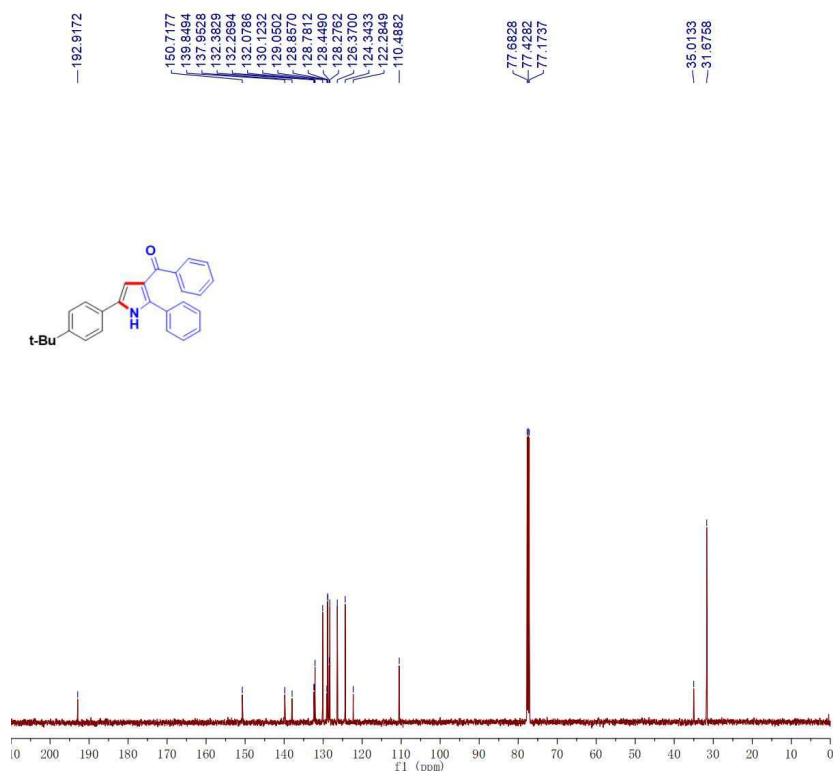

| Parameters                 |                                             |  |
|----------------------------|---------------------------------------------|--|
| Parameter                  | Value                                       |  |
| 1 Data File Name           | D:/ 核磁数据/ 20201011/                         |  |
| 2 标题                       | 2020-1-sy-C-112.fid                         |  |
| 3 Comment                  | 13C ztt                                     |  |
| 4 Origin                   | Bruker BioSpin CnubH                        |  |
| 5 Owner                    | nmrsu                                       |  |
| 6 Site                     |                                             |  |
| 7 Instrument               | spect                                       |  |
| 8 Author                   |                                             |  |
| 9 Solvent                  | CDCl <sub>3</sub>                           |  |
| 10 Temperature             | 298.2                                       |  |
| 11 Pulse Sequence          | zgpg30                                      |  |
| 12 Experiment              | 1D                                          |  |
| 13 Probe                   | Z119470_0117 (PA BBO 500S1 BBF-H-D-05 Z SP) |  |
| 14 Number of Scans         | 123                                         |  |
| 15 Receiver Gain           | 188.8                                       |  |
| 16 Relaxation Delay        | 2.0000                                      |  |
| 17 Pulse Width             | 10.0000                                     |  |
| 18 Presaturation Frequency |                                             |  |
| 19 Acquisition Time        | 0.5505                                      |  |
| 20 Acquisition Date        | 2020-07-26T16:42:14                         |  |
| 21 Modification Date       | 2020-07-26T16:42:16                         |  |
| 22 Class                   |                                             |  |
| 23 Spectrometer Frequency  | 125.78                                      |  |
| 24 Spectral Width          | 29761.9                                     |  |
| 25 Lowest Frequency        | -1627.5                                     |  |
| 26 Nucleus                 | 13C                                         |  |
| 27 Acquired Size           | 16384                                       |  |
| 28 Spectral Size           | 65536                                       |  |

Chemical structure of compound 10: CCCC1=CC=C(C=C1)-c2ccc(cc2)-c3c[nH]c4c3C(=O)c5ccccc54

<sup>1</sup>H NMR spectrum (CDCl<sub>3</sub>) of compound 10. The x-axis represents the chemical shift (f1) in ppm, ranging from 0 to 11. The y-axis represents the intensity. The spectrum shows several peaks, with integration values provided below the peaks: 1.00, 4.00, 2.00, 2.00, 2.00, 2.00, 3.00, 2.00, and 3.00. A list of peak chemical shifts (f1) is provided on the right side of the spectrum.

Peak chemical shifts (f1) in ppm:

- 9.4257
- 7.8075
- 7.7932
- 7.6885
- 7.5319
- 7.5158
- 7.4421
- 7.4274
- 7.4019
- 7.3976
- 7.3858
- 7.3351
- 7.3194
- 7.3044
- 7.2625
- 7.2465
- 7.1785
- 7.1730
- 7.1681
- 6.8560
- 6.8504
- 2.6556
- 2.6407
- 2.6250
- 1.7323
- 1.7176
- 1.7024
- 1.6873
- 1.6724
- 1.6577
- 1.0096
- 0.9850
- 0.9803

| Parameters |                             |                                                |
|------------|-----------------------------|------------------------------------------------|
|            | Parameter                   | Value                                          |
| 1          | Data File Name              | D:/ 核磁数据/ 20201011/                            |
| 2          | 标题                          | 2020-1-syjh-H314.fid                           |
| 3          | Comment                     | 1H ztt                                         |
| 4          | Origin                      | Broker BioSpin GmbH                            |
| 5          | Owner                       | mursu                                          |
| 6          | Site                        |                                                |
| 7          | Instrument                  | spect                                          |
| 8          | Author                      |                                                |
| 9          | Solvent                     | CDCI3                                          |
| 10         | Temperature                 | 296.5                                          |
| 11         | Pulse Sequence              | zg30                                           |
| 12         | Experiment                  | 1D                                             |
| 13         | Probe                       | Z119470_0117 (PA BBO<br>500S1 BBF-H-D-05 Z SP) |
| 14         | Number of Scans             | 4                                              |
| 15         | Receiver Gain               | 207.1                                          |
| 16         | Relaxation Delay            | 2.0000                                         |
| 17         | Pulse Width                 | 12.0000                                        |
| 18         | Pretsaturation<br>Frequency |                                                |
| 19         | Acquisition Time            | 1.8175                                         |
| 20         | Acquisition Date            | 2020-08-16T09:54:42                            |
| 21         | Modification Date           | 2020-08-16T09:54:44                            |
| 22         | Class                       |                                                |
| 23         | Spectrometer<br>Frequency   | 500.16                                         |
| 24         | Spectral Width              | 9014.4                                         |
| 25         | Lowest Frequency            | -1519.4                                        |
| 26         | Nucleus                     | 1H                                             |
| 27         | Acquired Size               | 16384                                          |
| 28         | Spectral Size               | 65536                                          |

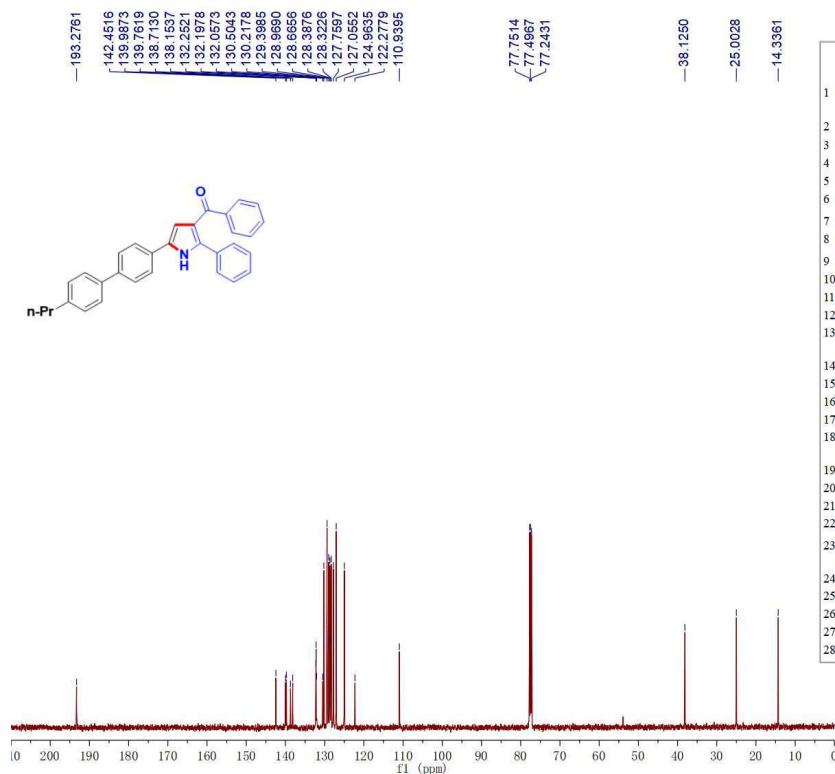

|    | Parameters               |                                             |
|----|--------------------------|---------------------------------------------|
|    | Parameter                | Value                                       |
| 1  | Data File Name           | D:\核磁数据\2020-yyj-HC\2020-1-yyj-C\358.fid    |
| 2  | 标题                       | 2020-1-yyj-C.358.fid                        |
| 3  | Comment                  | 13C ztt                                     |
| 4  | Origin                   | Braker BioSpin GmbH                         |
| 5  | Owner                    | nursu                                       |
| 6  | Site                     |                                             |
| 7  | Instrument               | spect                                       |
| 8  | Author                   |                                             |
| 9  | Solvent                  | CDCl3                                       |
| 10 | Temperature              | 295.4                                       |
| 11 | Pulse Sequence           | zgpg30                                      |
| 12 | Experiment               | 1D                                          |
| 13 | Probe                    | Z119470_0117 (PA.BBO 500S1 BBF-H-D-05 Z SP) |
| 14 | Number of Scans          | 100                                         |
| 15 | Receiver Gain            | 188.8                                       |
| 16 | Relaxation Delay         | 2.0000                                      |
| 17 | Pulse Width              | 10.0000                                     |
| 18 | Pretsaturation Frequency |                                             |
| 19 | Acquisition Time         | 0.5505                                      |
| 20 | Acquisition Date         | 2020-12-24T19:25:57                         |
| 21 | Modification Date        | 2020-12-24T19:26:00                         |
| 22 | Class                    |                                             |
| 23 | Spectrometer Frequency   | 125.78                                      |
| 24 | Spectral Width           | 29761.9                                     |
| 25 | Lowest Frequency         | -1627.5                                     |
| 26 | Nucleus                  | 13C                                         |
| 27 | Acquired Size            | 16384                                       |
| 28 | Spectral Size            | 65536                                       |

Phenyl(2-phenyl-5-(*m*-tolyl)-1*H*-pyrrol-3-yl)methanone (5j)

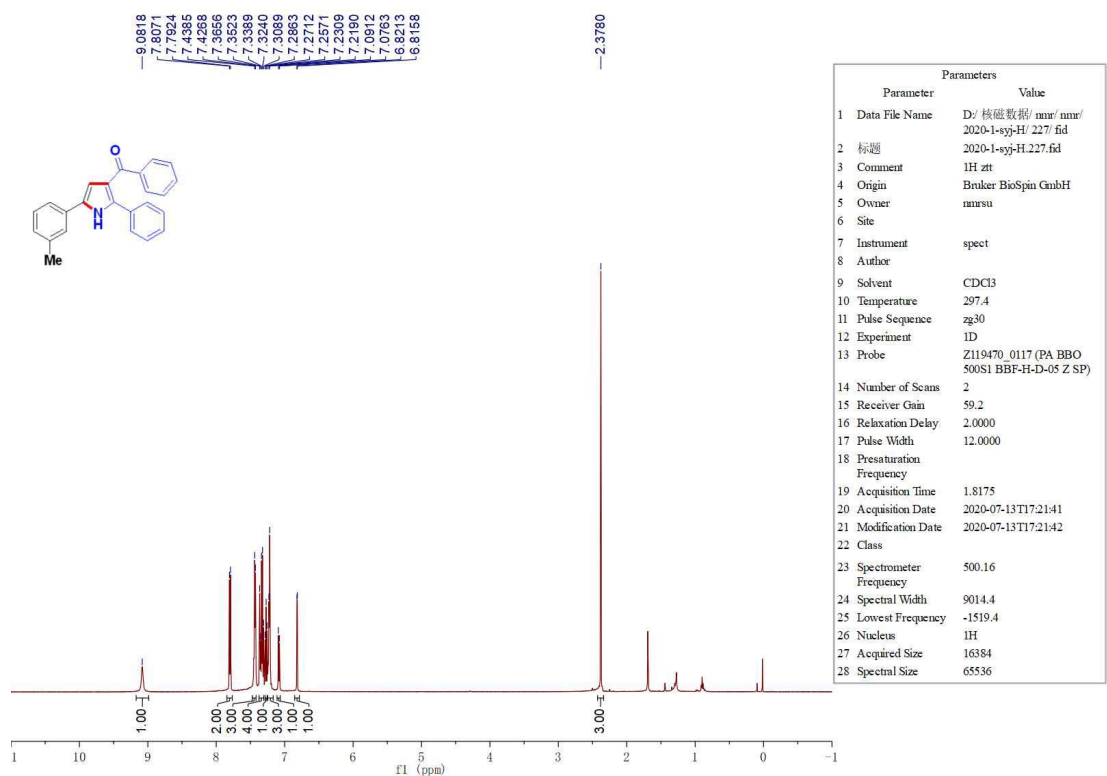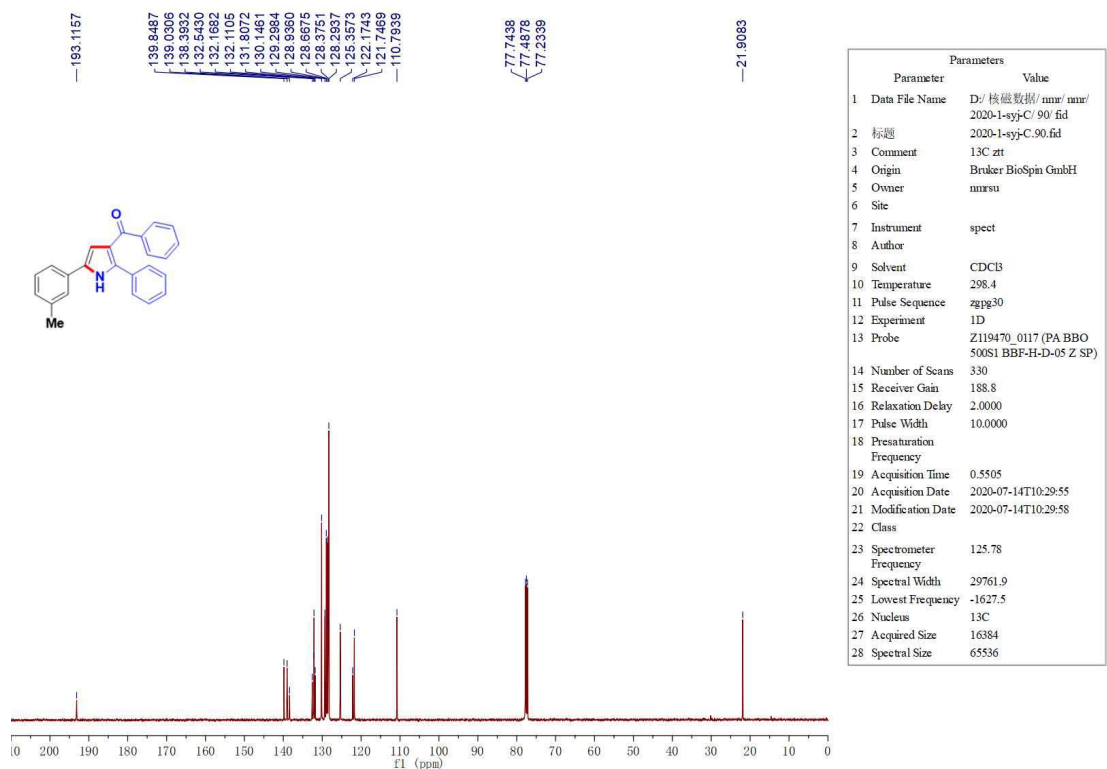

Chemical structure: O=C1C=C(c2ccc(Cl)cc2)Nc3ccccc31

<sup>1</sup>H NMR spectrum (CDCl<sub>3</sub>) showing peaks from 6.7 to 8.2 ppm. Integration values are provided below the peaks: 1.00, 2.00, 1.00, 1.00, 3.00, 3.00, 4.00, and 1.00.

| Parameters |                        | Value                                       |
|------------|------------------------|---------------------------------------------|
| Parameter  |                        |                                             |
| 1          | Data File Name         | D:/ 核磁数据/ mmr/ mmr/ 2020-1-syyj-H/ 228.fid  |
| 2          | 标题                     | 2020-1-syyj-H.228.fid                       |
| 3          | Comment                | 1H ztt                                      |
| 4          | Origin                 | Broker BioSpin GmbH                         |
| 5          | Owner                  | mmru                                        |
| 6          | Site                   |                                             |
| 7          | Instrument             | spect                                       |
| 8          | Author                 |                                             |
| 9          | Solvent                | CDCB                                        |
| 10         | Temperature            | 297.4                                       |
| 11         | Pulse Sequence         | zg30                                        |
| 12         | Experiment             | 1D                                          |
| 13         | Probe                  | Z119470_0117 (PA BBO 500S1 BBF-H-D-05 Z SP) |
| 14         | Number of Scans        | 2                                           |
| 15         | Receiver Gain          | 95.4                                        |
| 16         | Relaxation Delay       | 2.0000                                      |
| 17         | Pulse Width            | 12.0000                                     |
| 18         | Preturbation Frequency |                                             |
| 19         | Acquisition Time       | 1.8175                                      |
| 20         | Acquisition Date       | 2020-07-13T17:26:47                         |
| 21         | Modification Date      | 2020-07-13T17:26:48                         |
| 22         | Class                  |                                             |
| 23         | Spectrometer Frequency | 500.16                                      |
| 24         | Spectral Width         | 9014.4                                      |
| 25         | Lowest Frequency       | -1519.4                                     |
| 26         | Nucleus                | 1H                                          |
| 27         | Acquired Size          | 16384                                       |
| 28         | Spectral Size          | 6536                                        |

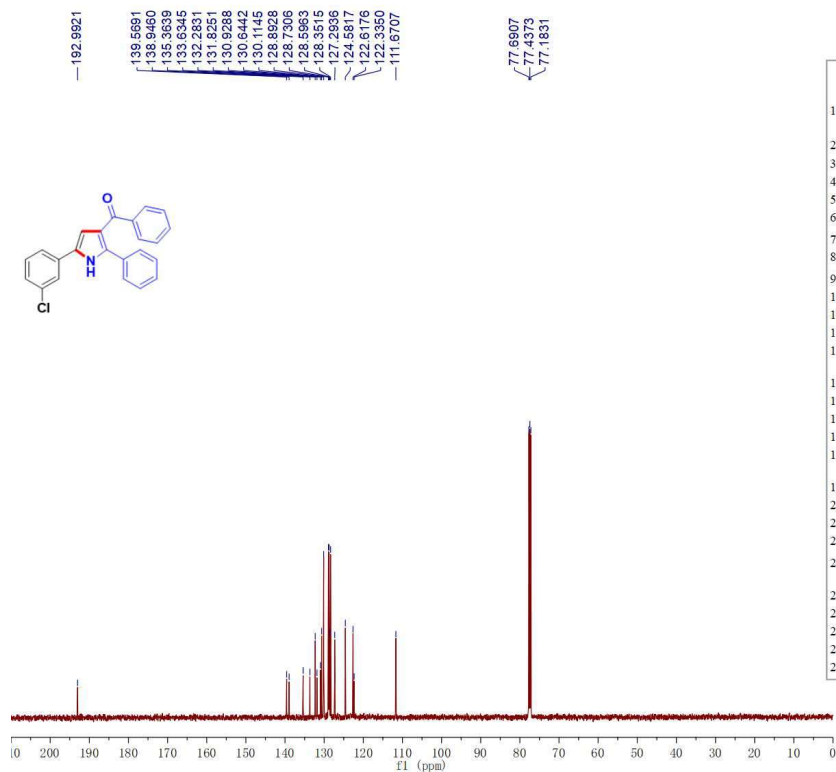

|    | Parameters               | Value                                       |
|----|--------------------------|---------------------------------------------|
| 1  | Data File Name           | D\ 核磁数据\ nmr\ nmr\ 2020-1-syJ-C\ 91\ fid    |
| 2  | 标题                       | 2020-1-syJ-C.91.fid                         |
| 3  | Comment                  | 13C att                                     |
| 4  | Origin                   | Broker BioSpin GrubH                        |
| 5  | Owner                    | nmru                                        |
| 6  | Site                     |                                             |
| 7  | Instrument               | spect                                       |
| 8  | Author                   |                                             |
| 9  | Solvent                  | CDCl3                                       |
| 10 | Temperature              | 298.3                                       |
| 11 | Pulse Sequence           | zgpg30                                      |
| 12 | Experiment               | 1D                                          |
| 13 | Probe                    | Z119470_0117 (PA BBO 500SI BBF-H-D-05 Z SP) |
| 14 | Number of Scans          | 140                                         |
| 15 | Receiver Gain            | 188.8                                       |
| 16 | Relaxation Delay         | 2.0000                                      |
| 17 | Pulse Width              | 10.0000                                     |
| 18 | Pretsaturation Frequency |                                             |
| 19 | Acquisition Time         | 0.5505                                      |
| 20 | Acquisition Date         | 2020-07-14T10:40:25                         |
| 21 | Modification Date        | 2020-07-14T10:40:28                         |
| 22 | Class                    |                                             |
| 23 | Spectrometer Frequency   | 125.78                                      |
| 24 | Spectral Width           | 29761.9                                     |
| 25 | Lowest Frequency         | -1627.5                                     |
| 26 | Nucleus                  | 13C                                         |
| 27 | Acquired Size            | 16384                                       |
| 28 | Spectral Size            | 65536                                       |

# (5-(3-Bromophenyl)-2-phenyl-1H-pyrrol-3-yl)(phenyl)methanone (5l)

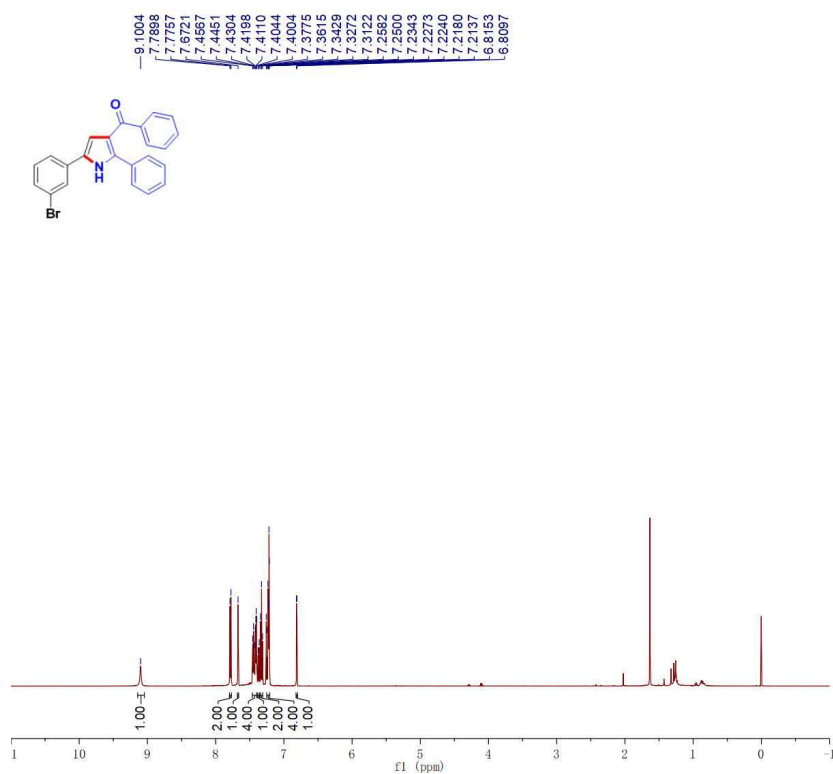

| Parameters                 |                                             |
|----------------------------|---------------------------------------------|
| Parameter                  | Value                                       |
| 1 Data File Name           | D:\核磁数据\20201011\2020-1-sy-H-266.fid        |
| 2 标题                       | 2020-1-sy-H-266.fid                         |
| 3 Comment                  | 1H ztt                                      |
| 4 Origin                   | Braker BioSpin GmbH                         |
| 5 Owner                    | nmrsu                                       |
| 6 Site                     |                                             |
| 7 Instrument               | spect                                       |
| 8 Author                   |                                             |
| 9 Solvent                  | CDCl3                                       |
| 10 Temperature             | 297.4                                       |
| 11 Pulse Sequence          | zg30                                        |
| 12 Experiment              | 1D                                          |
| 13 Probe                   | Z119470_0117 (PA BBO 500SI BBF-H-D-05 Z SP) |
| 14 Number of Scans         | 2                                           |
| 15 Receiver Gain           | 114.1                                       |
| 16 Relaxation Delay        | 2.0000                                      |
| 17 Pulse Width             | 12.0000                                     |
| 18 Presaturation Frequency |                                             |
| 19 Acquisition Time        | 1.8175                                      |
| 20 Acquisition Date        | 2020-07-26T11:32:32                         |
| 21 Modification Date       | 2020-07-26T11:32:34                         |
| 22 Class                   |                                             |
| 23 Spectrometer Frequency  | 500.16                                      |
| 24 Spectral Width          | 9014.4                                      |
| 25 Lowest Frequency        | -1519.4                                     |
| 26 Nucleus                 | 1H                                          |
| 27 Acquired Size           | 16384                                       |
| 28 Spectral Size           | 65536                                       |

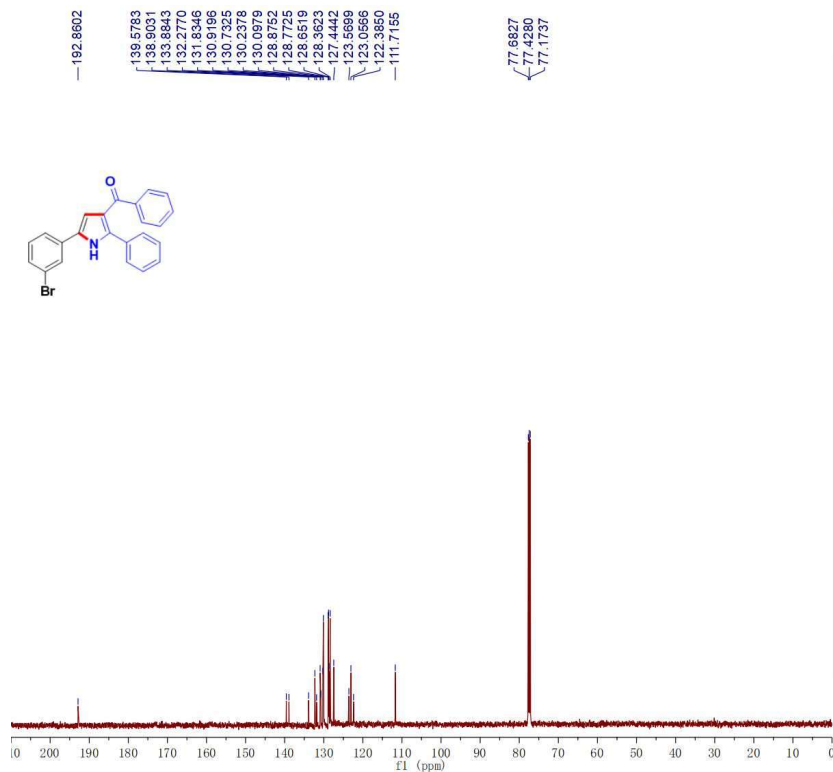

| Parameters                 |                                             |
|----------------------------|---------------------------------------------|
| Parameter                  | Value                                       |
| 1 Data File Name           | D:\核磁数据\20201011\2020-1-sy-C-113.fid        |
| 2 标题                       | 2020-1-sy-C-113.fid                         |
| 3 Comment                  | 13C ztt                                     |
| 4 Origin                   | Braker BioSpin GmbH                         |
| 5 Owner                    | nmrsu                                       |
| 6 Site                     |                                             |
| 7 Instrument               | spect                                       |
| 8 Author                   |                                             |
| 9 Solvent                  | CDCl3                                       |
| 10 Temperature             | 298.3                                       |
| 11 Pulse Sequence          | zgpg30                                      |
| 12 Experiment              | 1D                                          |
| 13 Probe                   | Z119470_0117 (PA BBO 500SI BBF-H-D-05 Z SP) |
| 14 Number of Scans         | 99                                          |
| 15 Receiver Gain           | 188.8                                       |
| 16 Relaxation Delay        | 2.0000                                      |
| 17 Pulse Width             | 10.0000                                     |
| 18 Presaturation Frequency |                                             |
| 19 Acquisition Time        | 0.5505                                      |
| 20 Acquisition Date        | 2020-07-26T16:50:55                         |
| 21 Modification Date       | 2020-07-26T16:50:58                         |
| 22 Class                   |                                             |
| 23 Spectrometer Frequency  | 125.78                                      |
| 24 Spectral Width          | 29761.9                                     |
| 25 Lowest Frequency        | -1627.5                                     |
| 26 Nucleus                 | 13C                                         |
| 27 Acquired Size           | 16384                                       |
| 28 Spectral Size           | 65536                                       |

# (5-(2-Fluorophenyl)-2-phenyl-1H-pyrrol-3-yl)(phenyl)methanone (5m)

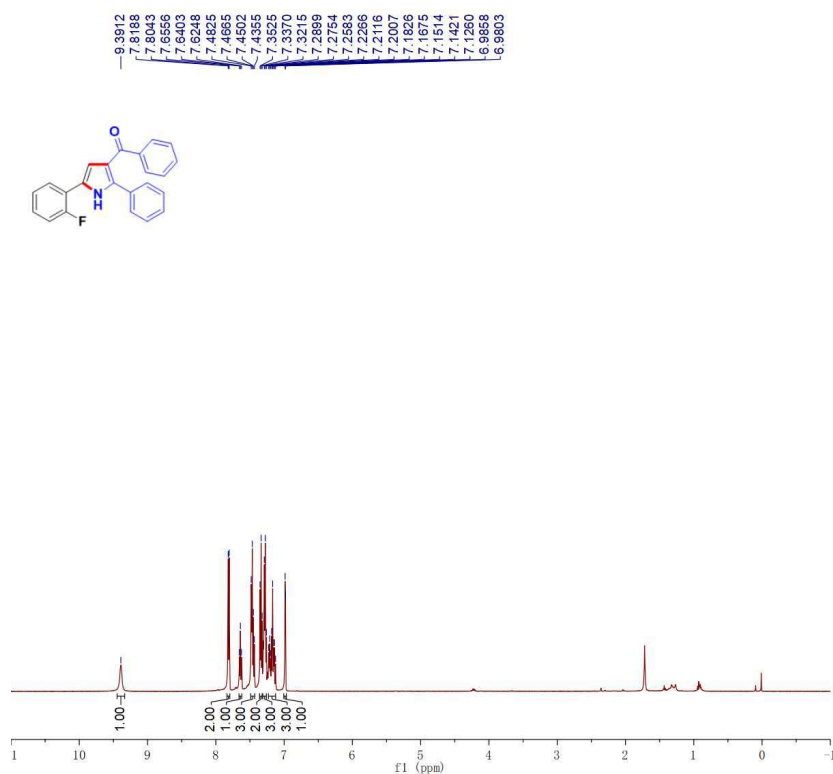

| Parameters                 |                                             |
|----------------------------|---------------------------------------------|
| Parameter                  | Value                                       |
| 1 Data File Name           | D:/ 核磁数据/ 20201011/ 2020-1-syf-H/ 292.fid   |
| 2 标题                       | 2020-1-syf-H-292.fid                        |
| 3 Comment                  | 1H zt                                       |
| 4 Origin                   | Bruker BioSpin GmbH                         |
| 5 Owner                    | nmrsu                                       |
| 6 Site                     |                                             |
| 7 Instrument               | spect                                       |
| 8 Author                   |                                             |
| 9 Solvent                  | CDCl3                                       |
| 10 Temperature             | 292.8                                       |
| 11 Pulse Sequence          | zg30                                        |
| 12 Experiment              | 1D                                          |
| 13 Probe                   | Z119470_0117 (PA BBO 500S1 BBF-H-D-05 Z SP) |
| 14 Number of Scans         | 4                                           |
| 15 Receiver Gain           | 59.2                                        |
| 16 Relaxation Delay        | 2.0000                                      |
| 17 Pulse Width             | 12.0000                                     |
| 18 Presaturation Frequency |                                             |
| 19 Acquisition Time        | 1.8175                                      |
| 20 Acquisition Date        | 2020-08-10T11:02:25                         |
| 21 Modification Date       | 2020-08-10T11:02:26                         |
| 22 Class                   |                                             |
| 23 Spectrometer Frequency  | 500.16                                      |
| 24 Spectral Width          | 9014.4                                      |
| 25 Lowest Frequency        | -1519.4                                     |
| 26 Nucleus                 | 1H                                          |
| 27 Acquired Size           | 16384                                       |
| 28 Spectral Size           | 65536                                       |

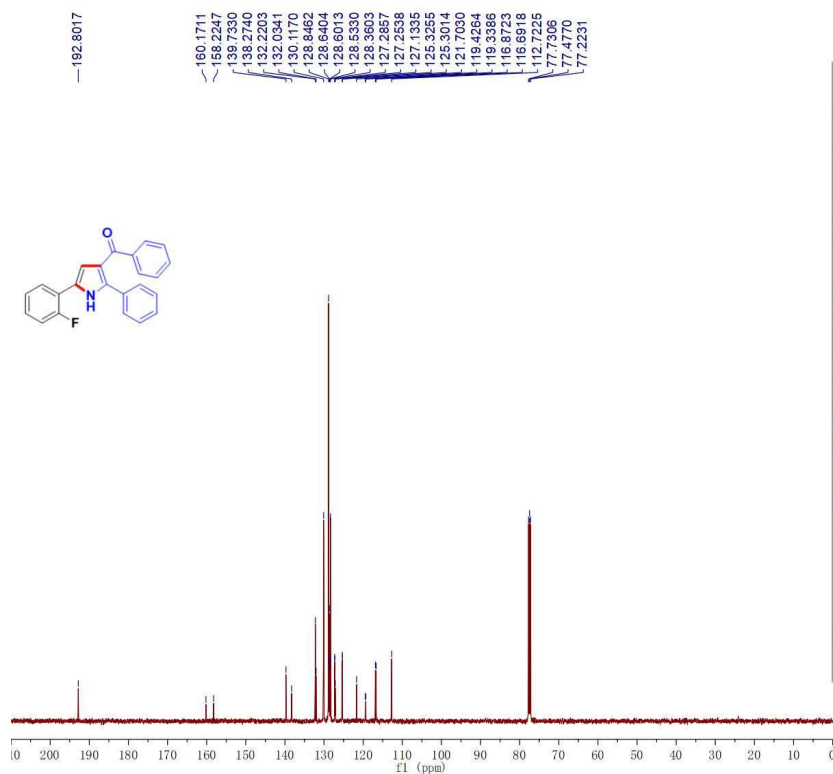

| Parameters                 |                                             |
|----------------------------|---------------------------------------------|
| Parameter                  | Value                                       |
| 1 Data File Name           | D:/ 核磁数据/ 20201011/ 2020-1-syf-C/ 130.fid   |
| 2 标题                       | 2020-1-syf-C-130.fid                        |
| 3 Comment                  | 13C zt                                      |
| 4 Origin                   | Bruker BioSpin GmbH                         |
| 5 Owner                    | nmrsu                                       |
| 6 Site                     |                                             |
| 7 Instrument               | spect                                       |
| 8 Author                   |                                             |
| 9 Solvent                  | CDCl3                                       |
| 10 Temperature             | 293.6                                       |
| 11 Pulse Sequence          | zgpg30                                      |
| 12 Experiment              | 1D                                          |
| 13 Probe                   | Z119470_0117 (PA BBO 500S1 BBF-H-D-05 Z SP) |
| 14 Number of Scans         | 100                                         |
| 15 Receiver Gain           | 188.8                                       |
| 16 Relaxation Delay        | 2.0000                                      |
| 17 Pulse Width             | 10.0000                                     |
| 18 Presaturation Frequency |                                             |
| 19 Acquisition Time        | 0.5505                                      |
| 20 Acquisition Date        | 2020-08-10T12:41:04                         |
| 21 Modification Date       | 2020-08-10T12:41:06                         |
| 22 Class                   |                                             |
| 23 Spectrometer Frequency  | 125.78                                      |
| 24 Spectral Width          | 29761.9                                     |
| 25 Lowest Frequency        | -1627.5                                     |
| 26 Nucleus                 | 13C                                         |
| 27 Acquired Size           | 16384                                       |
| 28 Spectral Size           | 65536                                       |



# (4-Chlorophenyl)(2-(4-chlorophenyl)-5-phenyl-1*H*-pyrrol-3-yl) methanone (5n)

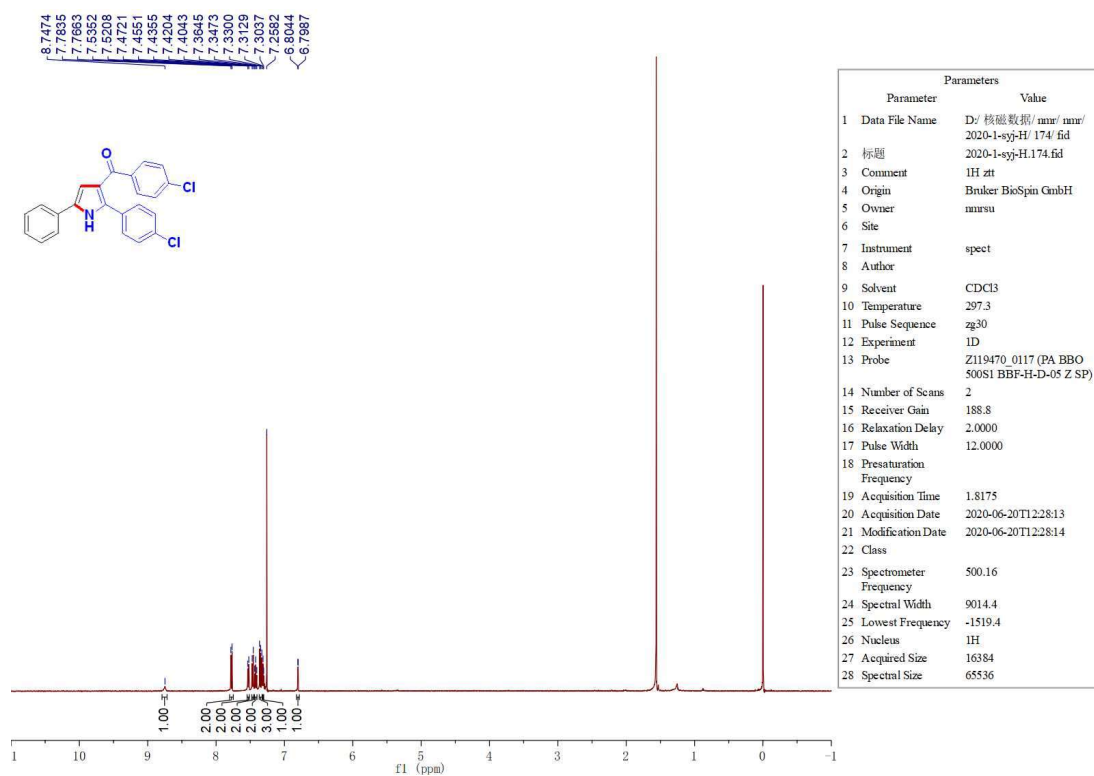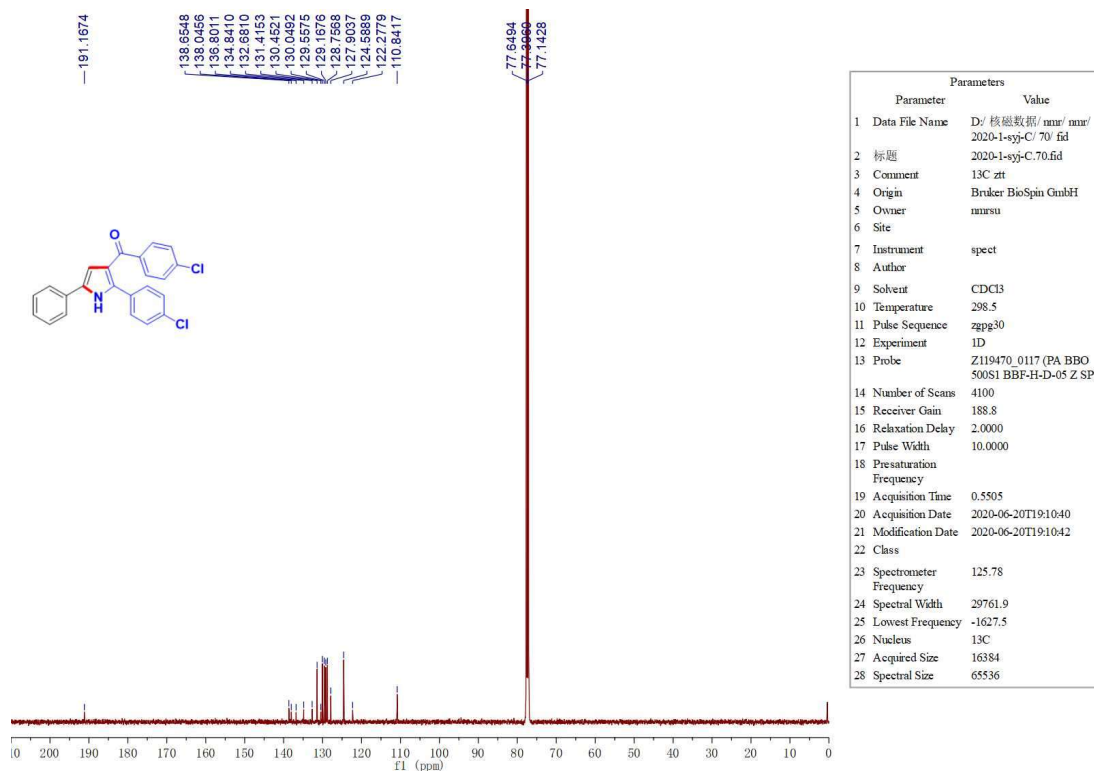



(2,5-Diphenyl-1*H*-pyrrol-3-yl) (naphthalen-2-yl) methanone (5o)

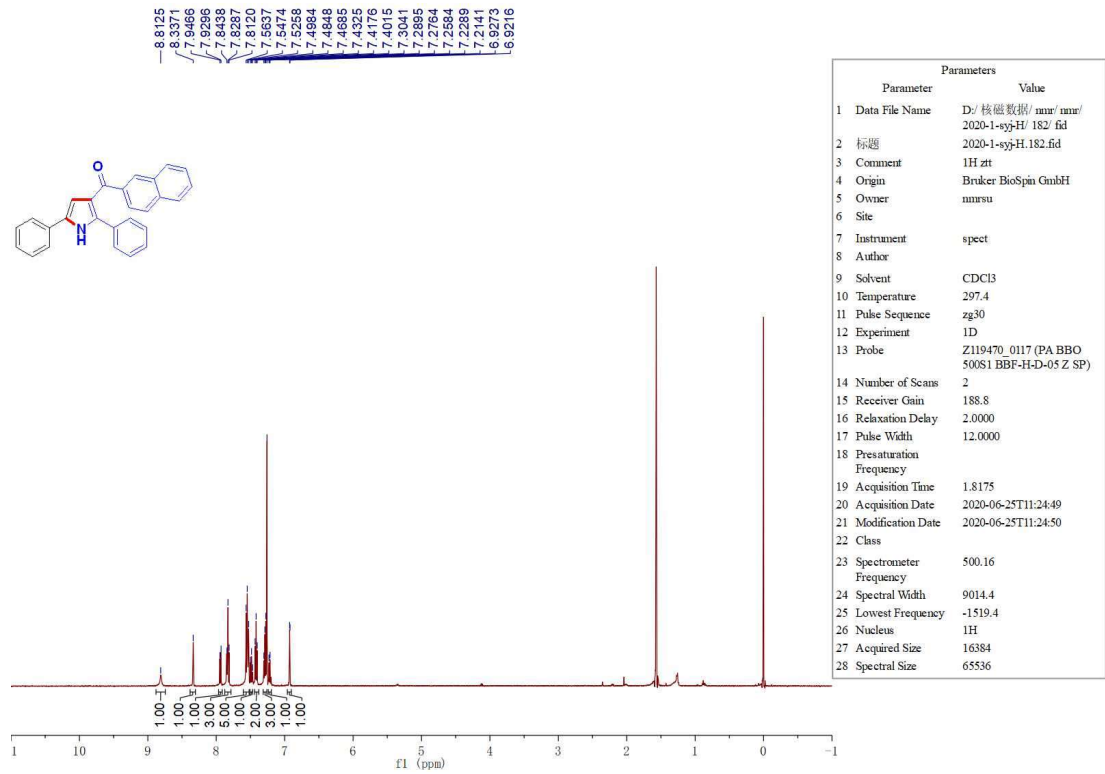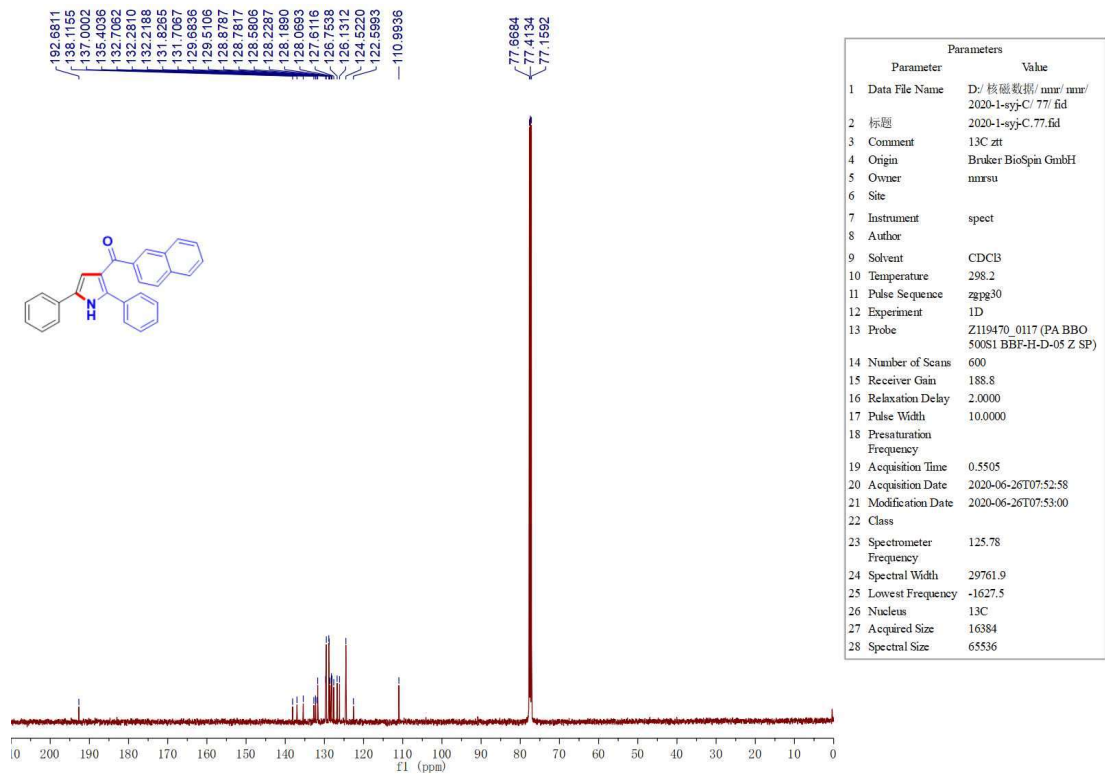

# (2,5-Diphenyl-1*H*-pyrrol-3-yl) (thiophen-2-yl) methanone (5p)

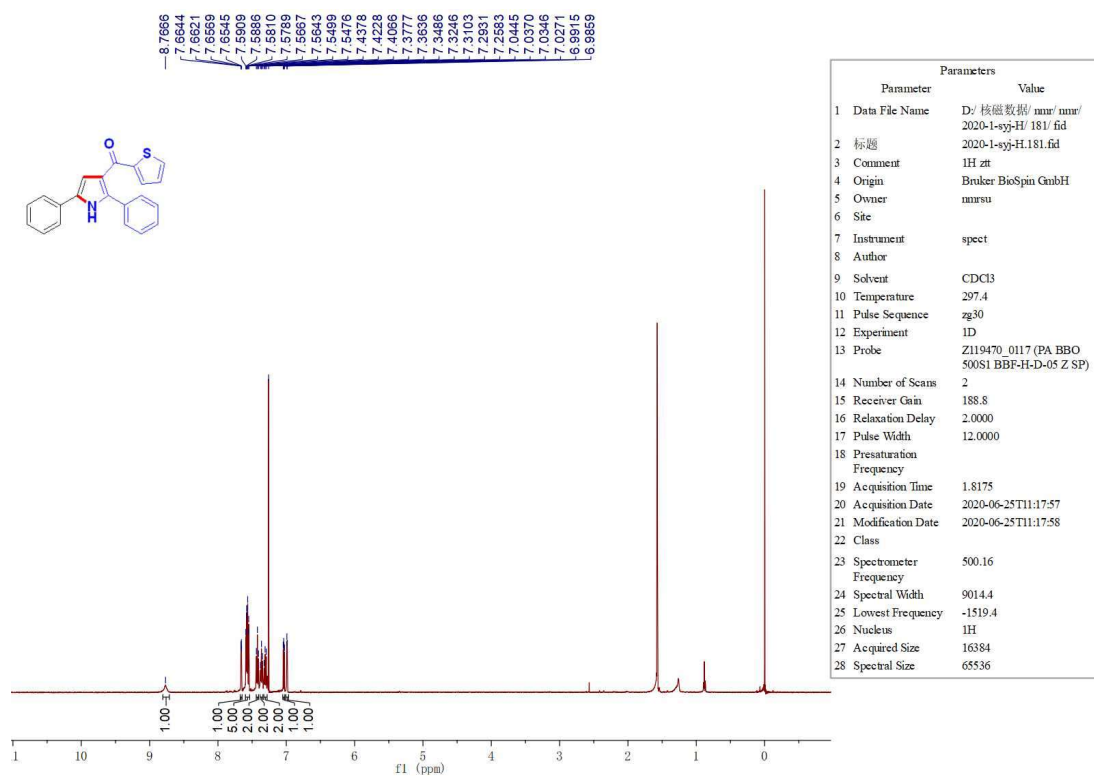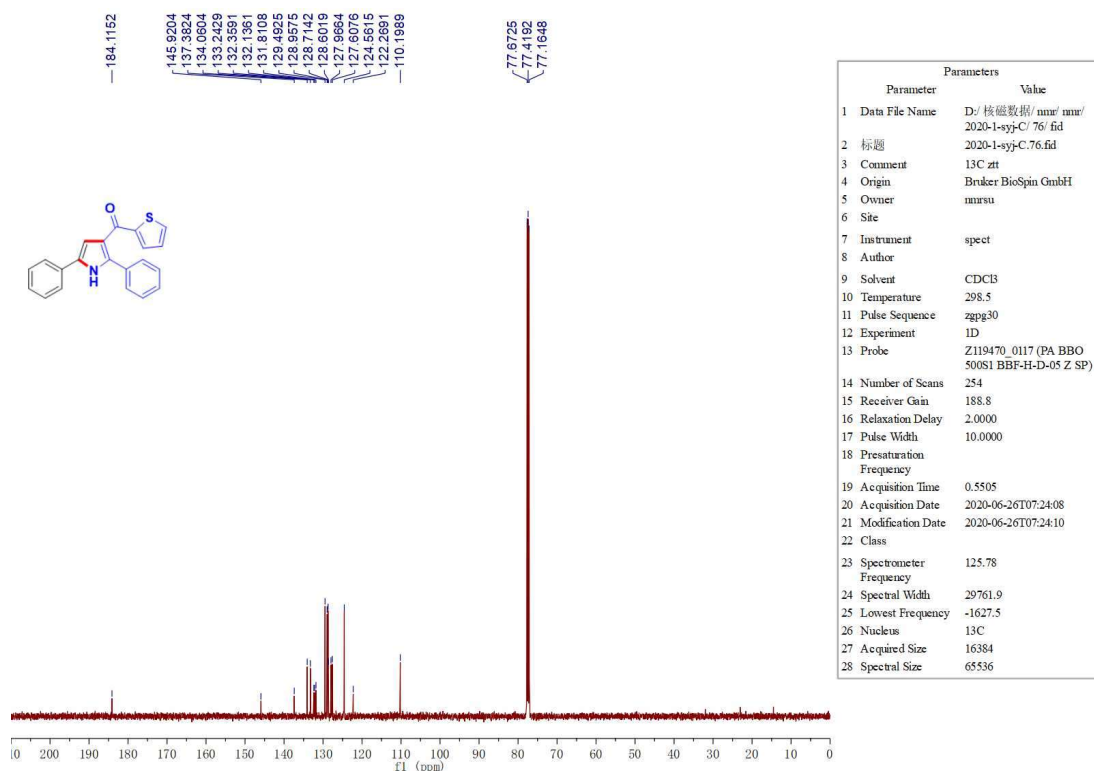

# (2-Isopropyl-5-phenyl-1H-pyrrol-3-yl) (phenyl)methanone (5q)

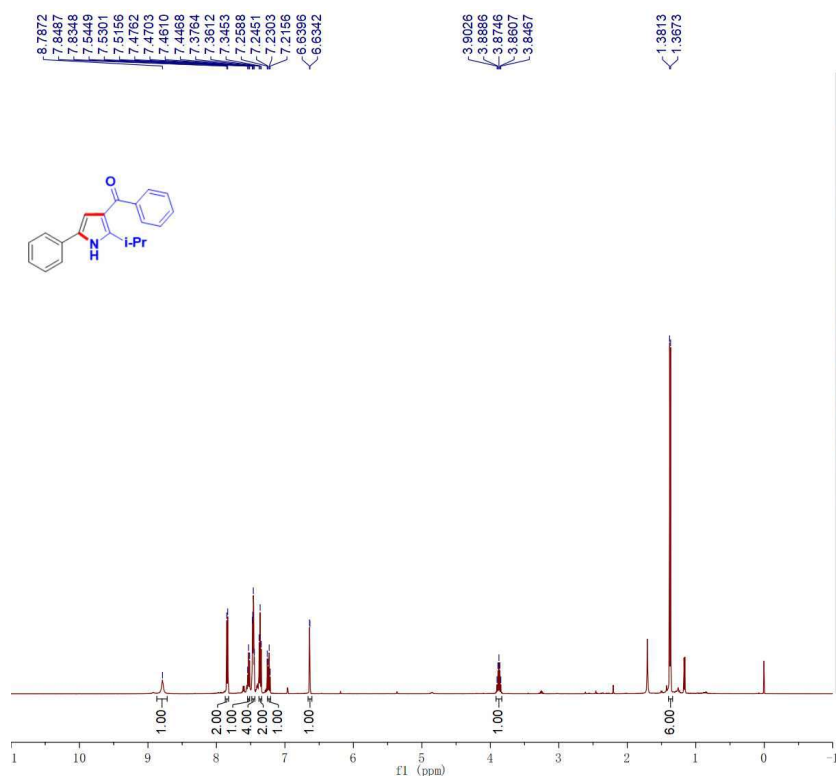

| Parameters                 |                                             |  |
|----------------------------|---------------------------------------------|--|
| Parameter                  | Value                                       |  |
| 1 Data File Name           | D:/ 核磁数据/ 20201011/ 2020-1-sy-H/ 295/ f1d   |  |
| 2 标题                       | 2020-1-sy-H.295.f1d                         |  |
| 3 Comment                  | 1H ztt                                      |  |
| 4 Origin                   | Bruker BioSpin GmbH                         |  |
| 5 Owner                    | nmrsu                                       |  |
| 6 Site                     |                                             |  |
| 7 Instrument               | spect                                       |  |
| 8 Author                   |                                             |  |
| 9 Solvent                  | CDCl3                                       |  |
| 10 Temperature             | 292.9                                       |  |
| 11 Pulse Sequence          | zg30                                        |  |
| 12 Experiment              | 1D                                          |  |
| 13 Probe                   | Z119470_0117 (PA BBO 500S1 BBF-H-D-05 Z SP) |  |
| 14 Number of Scans         | 4                                           |  |
| 15 Receiver Gain           | 66.5                                        |  |
| 16 Relaxation Delay        | 2.0000                                      |  |
| 17 Pulse Width             | 12.0000                                     |  |
| 18 Presaturation Frequency |                                             |  |
| 19 Acquisition Time        | 1.8175                                      |  |
| 20 Acquisition Date        | 2020-08-10T11:24:54                         |  |
| 21 Modification Date       | 2020-08-10T11:24:56                         |  |
| 22 Class                   |                                             |  |
| 23 Spectrometer Frequency  | 500.16                                      |  |
| 24 Spectral Width          | 9014.4                                      |  |
| 25 Lowest Frequency        | -1519.4                                     |  |
| 26 Nucleus                 | 1H                                          |  |
| 27 Acquired Size           | 16384                                       |  |
| 28 Spectral Size           | 65536                                       |  |

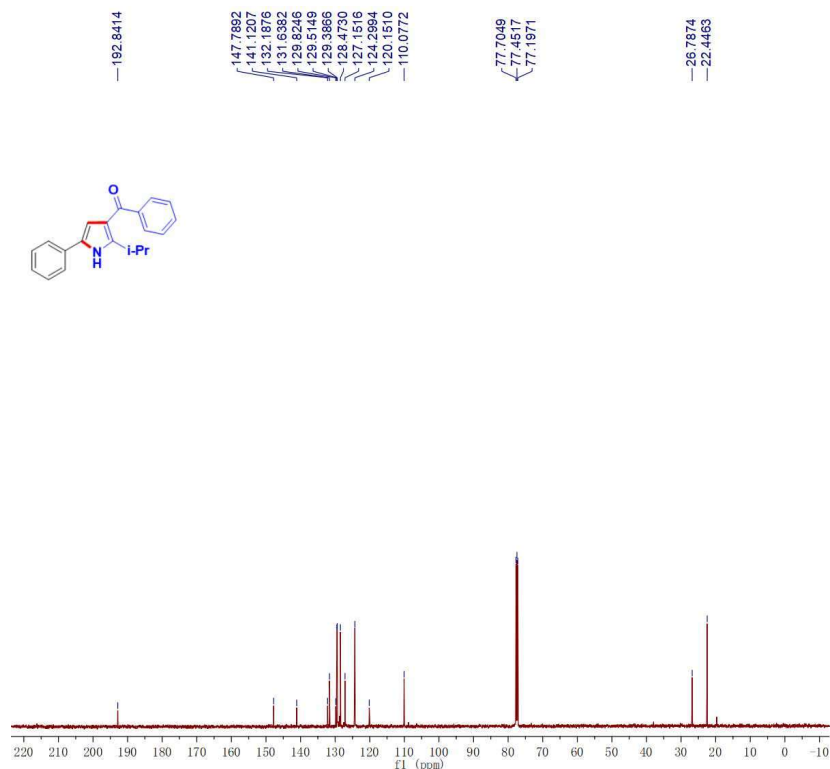

| Parameters                 |                                             |  |
|----------------------------|---------------------------------------------|--|
| Parameter                  | Value                                       |  |
| 1 Data File Name           | D:/ 核磁数据/ 20201011/ 2020-1-sy-C/ 133/ f1d   |  |
| 2 标题                       | 2020-1-sy-C.133.f1d                         |  |
| 3 Comment                  | 13C ztt                                     |  |
| 4 Origin                   | Bruker BioSpin GmbH                         |  |
| 5 Owner                    | nmrsu                                       |  |
| 6 Site                     |                                             |  |
| 7 Instrument               | spect                                       |  |
| 8 Author                   |                                             |  |
| 9 Solvent                  | CDCl3                                       |  |
| 10 Temperature             | 294.0                                       |  |
| 11 Pulse Sequence          | zgpg30                                      |  |
| 12 Experiment              | 1D                                          |  |
| 13 Probe                   | Z119470_0117 (PA BBO 500S1 BBF-H-D-05 Z SP) |  |
| 14 Number of Scans         | 120                                         |  |
| 15 Receiver Gain           | 188.8                                       |  |
| 16 Relaxation Delay        | 2.0000                                      |  |
| 17 Pulse Width             | 10.0000                                     |  |
| 18 Presaturation Frequency |                                             |  |
| 19 Acquisition Time        | 0.5505                                      |  |
| 20 Acquisition Date        | 2020-08-10T13:09:58                         |  |
| 21 Modification Date       | 2020-08-10T13:10:00                         |  |
| 22 Class                   |                                             |  |
| 23 Spectrometer Frequency  | 125.78                                      |  |
| 24 Spectral Width          | 29761.9                                     |  |
| 25 Lowest Frequency        | -1627.5                                     |  |
| 26 Nucleus                 | 13C                                         |  |
| 27 Acquired Size           | 16384                                       |  |
| 28 Spectral Size           | 65536                                       |  |

Phenyl(5-phenyl-2-propyl-1*H*-pyrrol-3-yl) methanone (5r)

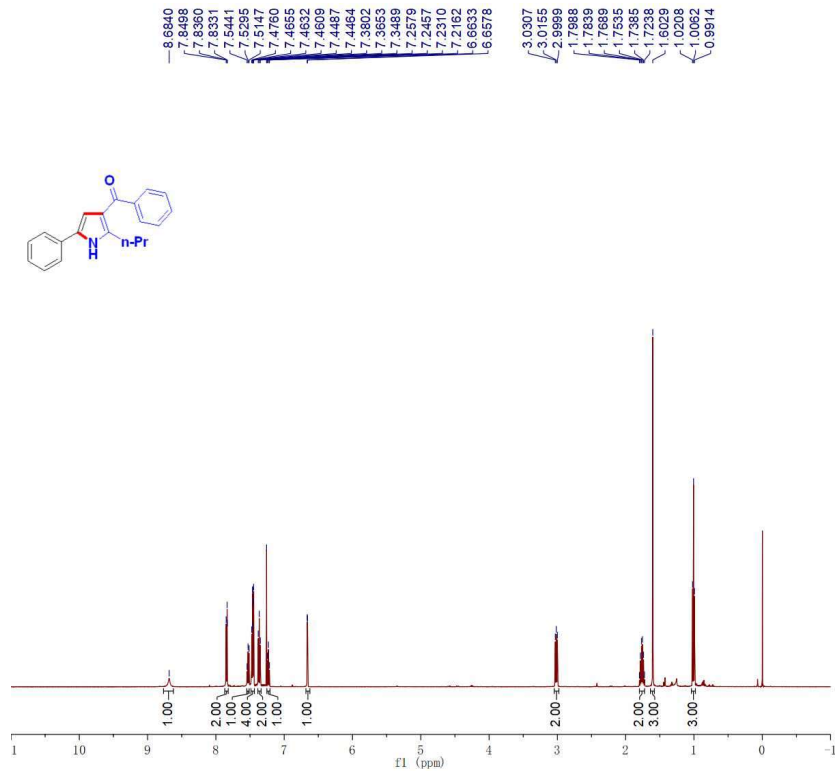

| Parameters                 |                                             |  |
|----------------------------|---------------------------------------------|--|
| Parameter                  | Value                                       |  |
| 1 Data File Name           | D:/ 核磁数据/ nmr/ nmr/                         |  |
| 2 标题                       | 2020-1-sy-H-225.fid                         |  |
| 3 Comment                  | 1H ztt                                      |  |
| 4 Origin                   | Bruker BioSpin GmbH                         |  |
| 5 Owner                    | nmrsu                                       |  |
| 6 Site                     |                                             |  |
| 7 Instrument               | spect                                       |  |
| 8 Author                   |                                             |  |
| 9 Solvent                  | CDCl3                                       |  |
| 10 Temperature             | 297.4                                       |  |
| 11 Pulse Sequence          | zg30                                        |  |
| 12 Experiment              | 1D                                          |  |
| 13 Probe                   | Z119470_0117 (PA BBO 500SI BBF-H-D-05 Z SP) |  |
| 14 Number of Scans         | 2                                           |  |
| 15 Receiver Gain           | 128.6                                       |  |
| 16 Relaxation Delay        | 2.0000                                      |  |
| 17 Pulse Width             | 12.0000                                     |  |
| 18 Presaturation Frequency |                                             |  |
| 19 Acquisition Time        | 1.8175                                      |  |
| 20 Acquisition Date        | 2020-07-13T17:00:08                         |  |
| 21 Modification Date       | 2020-07-13T17:00:10                         |  |
| 22 Class                   |                                             |  |
| 23 Spectrometer Frequency  | 500.16                                      |  |
| 24 Spectral Width          | 9014.4                                      |  |
| 25 Lowest Frequency        | -1519.4                                     |  |
| 26 Nucleus                 | 1H                                          |  |
| 27 Acquired Size           | 16384                                       |  |
| 28 Spectral Size           | 65536                                       |  |

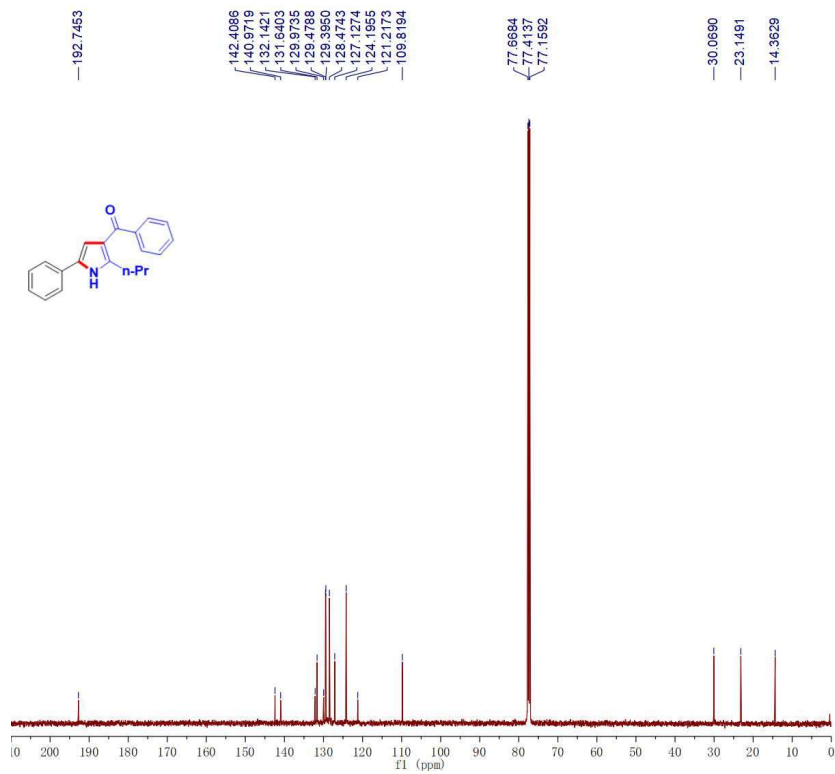

| Parameters                 |                                             |  |
|----------------------------|---------------------------------------------|--|
| Parameter                  | Value                                       |  |
| 1 Data File Name           | D:/ 核磁数据/ nmr/ nmr/                         |  |
| 2 标题                       | 2020-1-sy-C-88.fid                          |  |
| 3 Comment                  | 13C ztt                                     |  |
| 4 Origin                   | Bruker BioSpin GmbH                         |  |
| 5 Owner                    | nmrsu                                       |  |
| 6 Site                     |                                             |  |
| 7 Instrument               | spect                                       |  |
| 8 Author                   |                                             |  |
| 9 Solvent                  | CDCl3                                       |  |
| 10 Temperature             | 298.3                                       |  |
| 11 Pulse Sequence          | zgpg30                                      |  |
| 12 Experiment              | 1D                                          |  |
| 13 Probe                   | Z119470_0117 (PA BBO 500SI BBF-H-D-05 Z SP) |  |
| 14 Number of Scans         | 660                                         |  |
| 15 Receiver Gain           | 188.8                                       |  |
| 16 Relaxation Delay        | 2.0000                                      |  |
| 17 Pulse Width             | 10.0000                                     |  |
| 18 Presaturation Frequency |                                             |  |
| 19 Acquisition Time        | 0.5505                                      |  |
| 20 Acquisition Date        | 2020-07-14T09:50:55                         |  |
| 21 Modification Date       | 2020-07-14T09:50:58                         |  |
| 22 Class                   |                                             |  |
| 23 Spectrometer Frequency  | 125.78                                      |  |
| 24 Spectral Width          | 29761.9                                     |  |
| 25 Lowest Frequency        | -1627.5                                     |  |
| 26 Nucleus                 | 13C                                         |  |
| 27 Acquired Size           | 16384                                       |  |
| 28 Spectral Size           | 65536                                       |  |

(2-Butyl-5-phenyl-1*H*-pyrrol-3-yl) ( phenyl)methanone (5s)

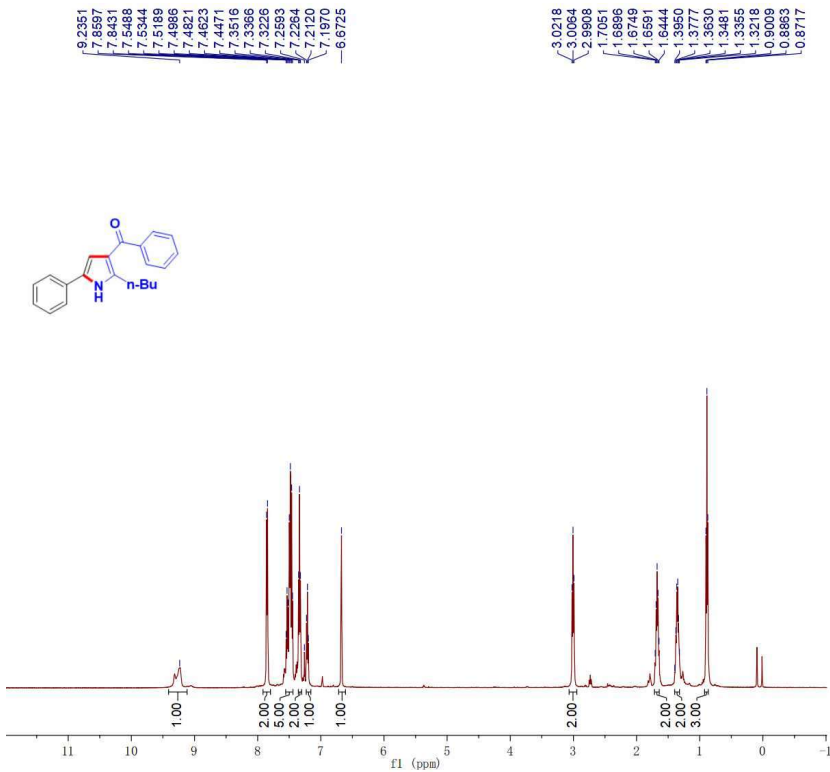

| Parameters                 |                                              |
|----------------------------|----------------------------------------------|
| Parameter                  | Value                                        |
| 1 Data File Name           | D:/ 核磁数据/ 2021-syj-500/ 2021-1-syj-H/ 6/ fid |
| 2 标题                       | 2021-1-syj-H.6.fid                           |
| 3 Comment                  | 1H ztt                                       |
| 4 Origin                   | Bruker BioSpin GmbH                          |
| 5 Owner                    | nursu                                        |
| 6 Site                     |                                              |
| 7 Instrument               | spect                                        |
| 8 Author                   |                                              |
| 9 Solvent                  | CDCl3                                        |
| 10 Temperature             | 291.5                                        |
| 11 Pulse Sequence          | zg30                                         |
| 12 Experiment              | 1D                                           |
| 13 Probe                   | Z119470_0117 (PA BBO 500S1 BBF-H-D-05 Z SP)  |
| 14 Number of Scans         | 2                                            |
| 15 Receiver Gain           | 53.4                                         |
| 16 Relaxation Delay        | 2.0000                                       |
| 17 Pulse Width             | 12.0000                                      |
| 18 Presaturation Frequency |                                              |
| 19 Acquisition Time        | 1.8175                                       |
| 20 Acquisition Date        | 2021-01-10T16:00:03                          |
| 21 Modification Date       | 2021-01-10T16:00:04                          |
| 22 Class                   |                                              |
| 23 Spectrometer Frequency  | 500.16                                       |
| 24 Spectral Width          | 9014.4                                       |
| 25 Lowest Frequency        | -1519.4                                      |
| 26 Nucleus                 | 1H                                           |
| 27 Acquired Size           | 16384                                        |
| 28 Spectral Size           | 65536                                        |

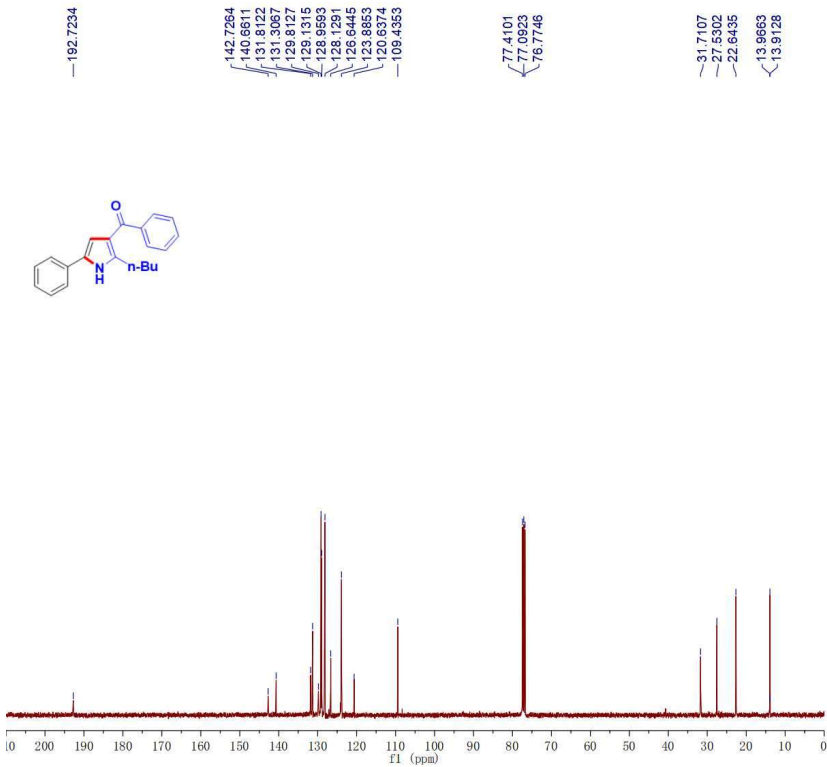

| Parameters                 |                                                |
|----------------------------|------------------------------------------------|
| Parameter                  | Value                                          |
| 1 Data File Name           | D:/ 核磁数据/ 400/ 2021-1-syj-C/ 13/ fid           |
| 2 标题                       | 2021-1-syj-C.13.fid                            |
| 3 Comment                  |                                                |
| 4 Origin                   | Bruker BioSpin GmbH                            |
| 5 Owner                    | nursu                                          |
| 6 Site                     |                                                |
| 7 Instrument               | Avance                                         |
| 8 Author                   |                                                |
| 9 Solvent                  | CDCl3                                          |
| 10 Temperature             | 294.7                                          |
| 11 Pulse Sequence          | zgpg30                                         |
| 12 Experiment              | 1D                                             |
| 13 Probe                   | Z163739_0032 (PI HR-400-S1-BBF/ H/ D-5.0-Z SP) |
| 14 Number of Scans         | 191                                            |
| 15 Receiver Gain           | 48.1                                           |
| 16 Relaxation Delay        | 2.0000                                         |
| 17 Pulse Width             | 10.0000                                        |
| 18 Presaturation Frequency |                                                |
| 19 Acquisition Time        | 1.3763                                         |
| 20 Acquisition Date        | 2021-01-17T14:08:08                            |
| 21 Modification Date       | 2021-01-17T14:07:32                            |
| 22 Class                   |                                                |
| 23 Spectrometer Frequency  | 100.62                                         |
| 24 Spectral Width          | 23809.5                                        |
| 25 Lowest Frequency        | -1843.5                                        |
| 26 Nucleus                 | 13C                                            |
| 27 Acquired Size           | 32768                                          |
| 28 Spectral Size           | 65536                                          |

# (1,2-Dimethyl-5-phenyl-1H-pyrrol-3-yl) (phenyl)methanone (7a)

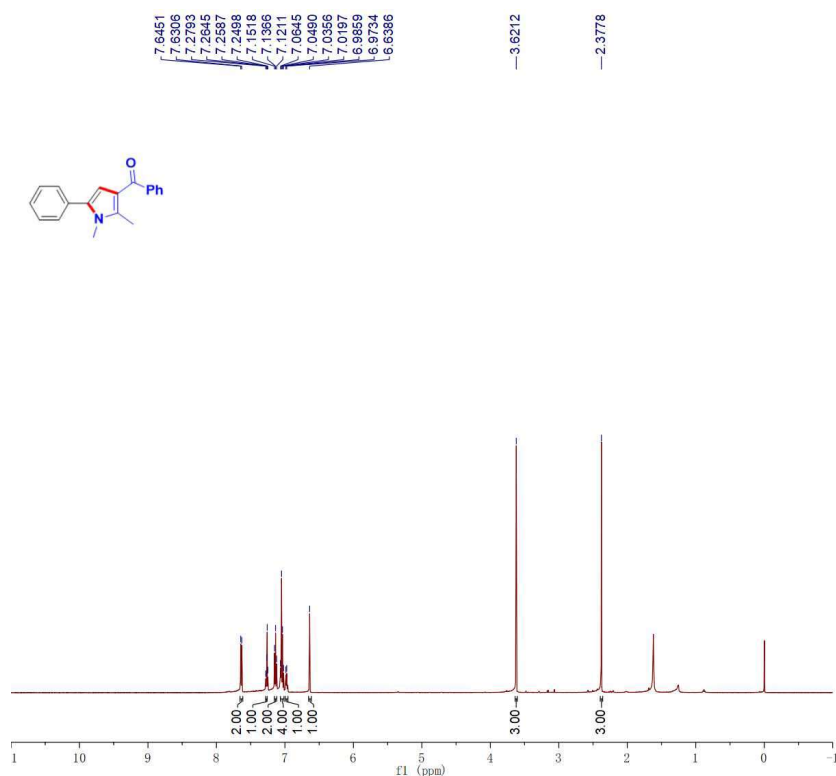

| Parameters                 |                                             |
|----------------------------|---------------------------------------------|
| Parameter                  | Value                                       |
| 1 Data File Name           | D:/ 核磁数据/ 20201011/ 2020-1-sy-j-H/ 305/ fid |
| 2 标题                       | 2020-1-sy-j-H-305.fid                       |
| 3 Comment                  | 1H ztt                                      |
| 4 Origin                   | Bruker BioSpin GmbH                         |
| 5 Owner                    | mrsu                                        |
| 6 Site                     |                                             |
| 7 Instrument               | spect                                       |
| 8 Author                   |                                             |
| 9 Solvent                  | CDCl3                                       |
| 10 Temperature             | 293.7                                       |
| 11 Pulse Sequence          | zg30                                        |
| 12 Experiment              | 1D                                          |
| 13 Probe                   | Z119470_0117 (PA BBO 500S1 BBF-H-D-05 Z SP) |
| 14 Number of Scans         | 4                                           |
| 15 Receiver Gain           | 114.1                                       |
| 16 Relaxation Delay        | 2.0000                                      |
| 17 Pulse Width             | 12.0000                                     |
| 18 Presaturation Frequency |                                             |
| 19 Acquisition Time        | 1.8175                                      |
| 20 Acquisition Date        | 2020-08-14T11:19:29                         |
| 21 Modification Date       | 2020-08-14T11:19:30                         |
| 22 Class                   |                                             |
| 23 Spectrometer Frequency  | 500.16                                      |
| 24 Spectral Width          | 9014.4                                      |
| 25 Lowest Frequency        | -1519.4                                     |
| 26 Nucleus                 | 1H                                          |
| 27 Acquired Size           | 16384                                       |
| 28 Spectral Size           | 65536                                       |

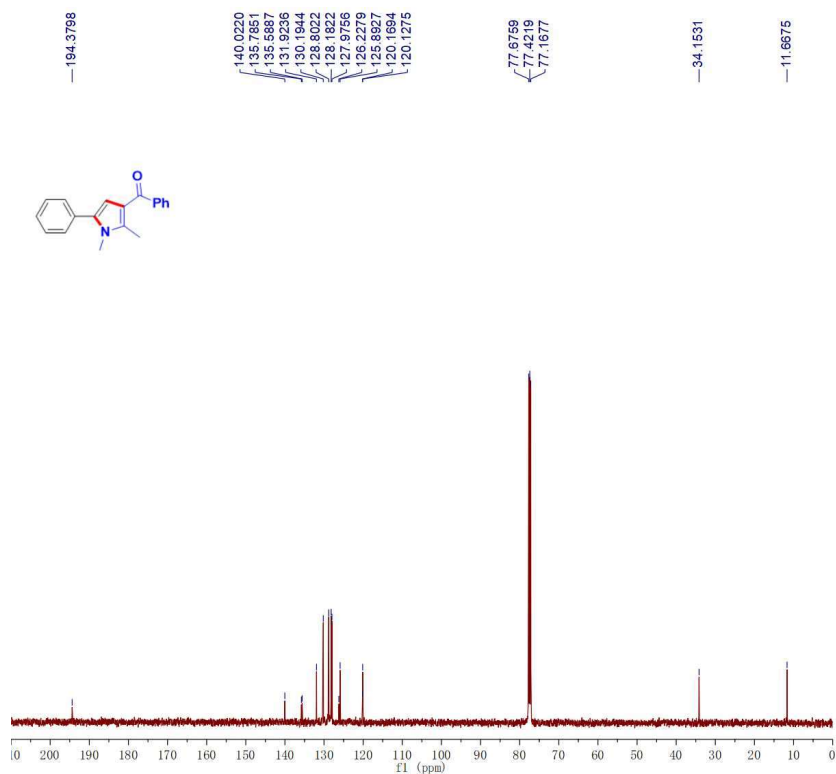

| Parameters                 |                                             |
|----------------------------|---------------------------------------------|
| Parameter                  | Value                                       |
| 1 Data File Name           | D:/ 核磁数据/ 20201011/ 2020-1-sy-j-C/ 138/ fid |
| 2 标题                       | 2020-1-sy-j-C-138.fid                       |
| 3 Comment                  | 13C ztt                                     |
| 4 Origin                   | Bruker BioSpin GmbH                         |
| 5 Owner                    | mrsu                                        |
| 6 Site                     |                                             |
| 7 Instrument               | spect                                       |
| 8 Author                   |                                             |
| 9 Solvent                  | CDCl3                                       |
| 10 Temperature             | 297.2                                       |
| 11 Pulse Sequence          | zgpg30                                      |
| 12 Experiment              | 1D                                          |
| 13 Probe                   | Z119470_0117 (PA BBO 500S1 BBF-H-D-05 Z SP) |
| 14 Number of Scans         | 208                                         |
| 15 Receiver Gain           | 188.8                                       |
| 16 Relaxation Delay        | 2.0000                                      |
| 17 Pulse Width             | 10.0000                                     |
| 18 Presaturation Frequency |                                             |
| 19 Acquisition Time        | 0.5505                                      |
| 20 Acquisition Date        | 2020-08-16T17:48:08                         |
| 21 Modification Date       | 2020-08-16T17:48:10                         |
| 22 Class                   |                                             |
| 23 Spectrometer Frequency  | 125.78                                      |
| 24 Spectral Width          | 29761.9                                     |
| 25 Lowest Frequency        | -1627.5                                     |
| 26 Nucleus                 | 13C                                         |
| 27 Acquired Size           | 16384                                       |
| 28 Spectral Size           | 65536                                       |

# 1-(2-Methyl-5-phenyl-1-(*p*-tolyl)-1*H*-pyrrol-3-yl) ethan-1-one (7b)

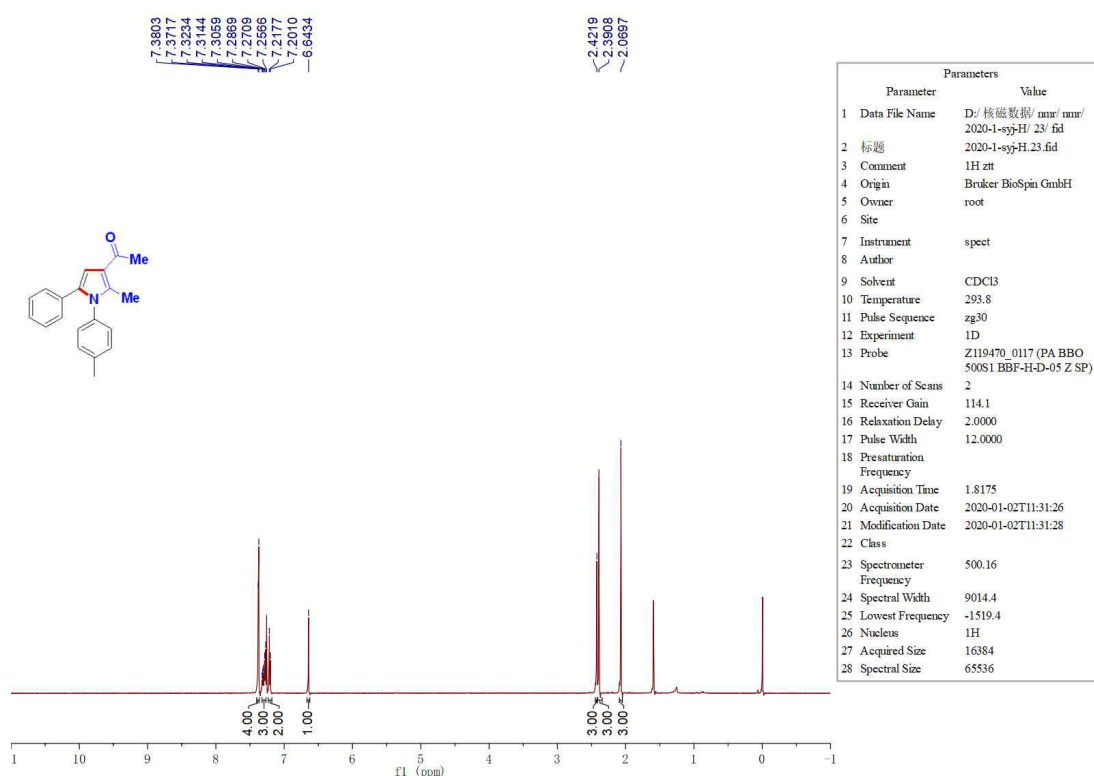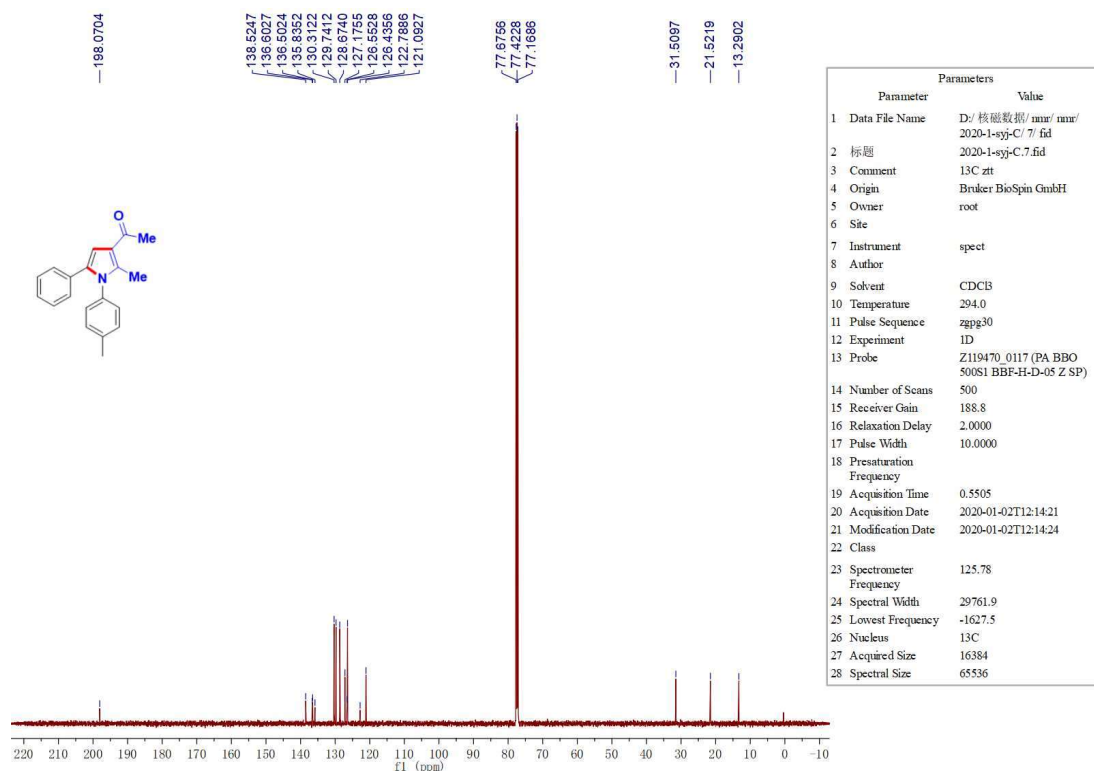



2-Methyl-4-phenyl-1H-imidazole (8)

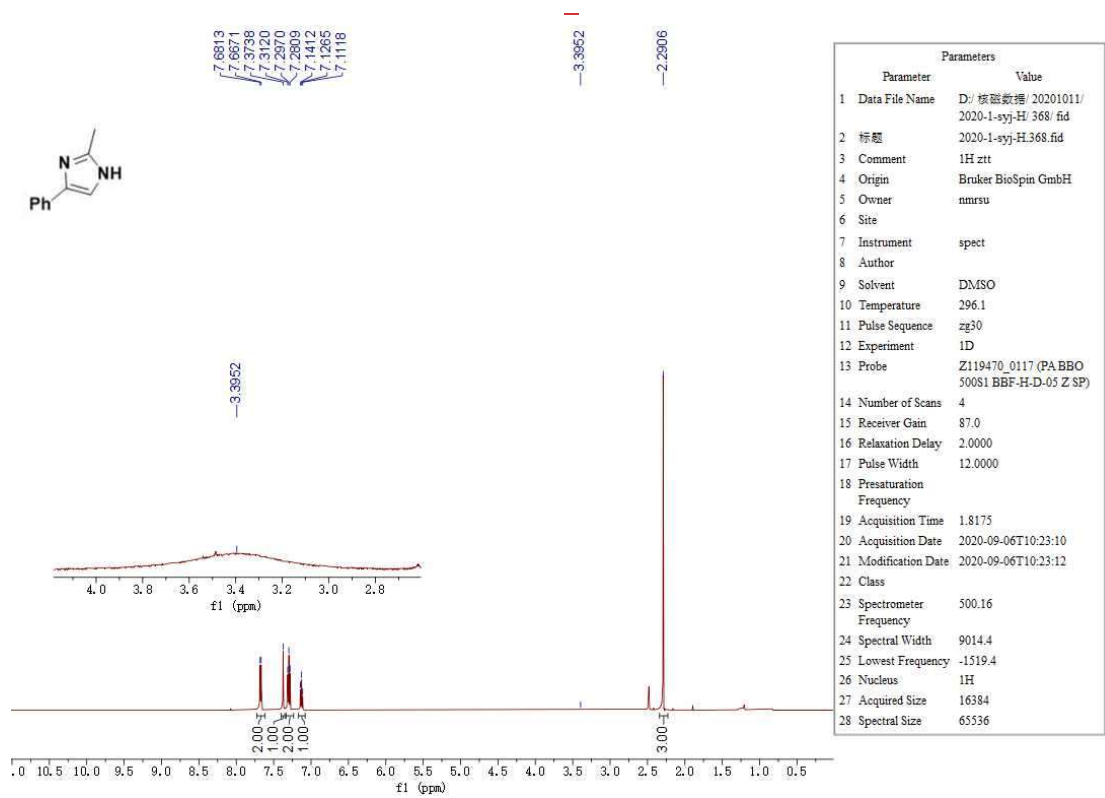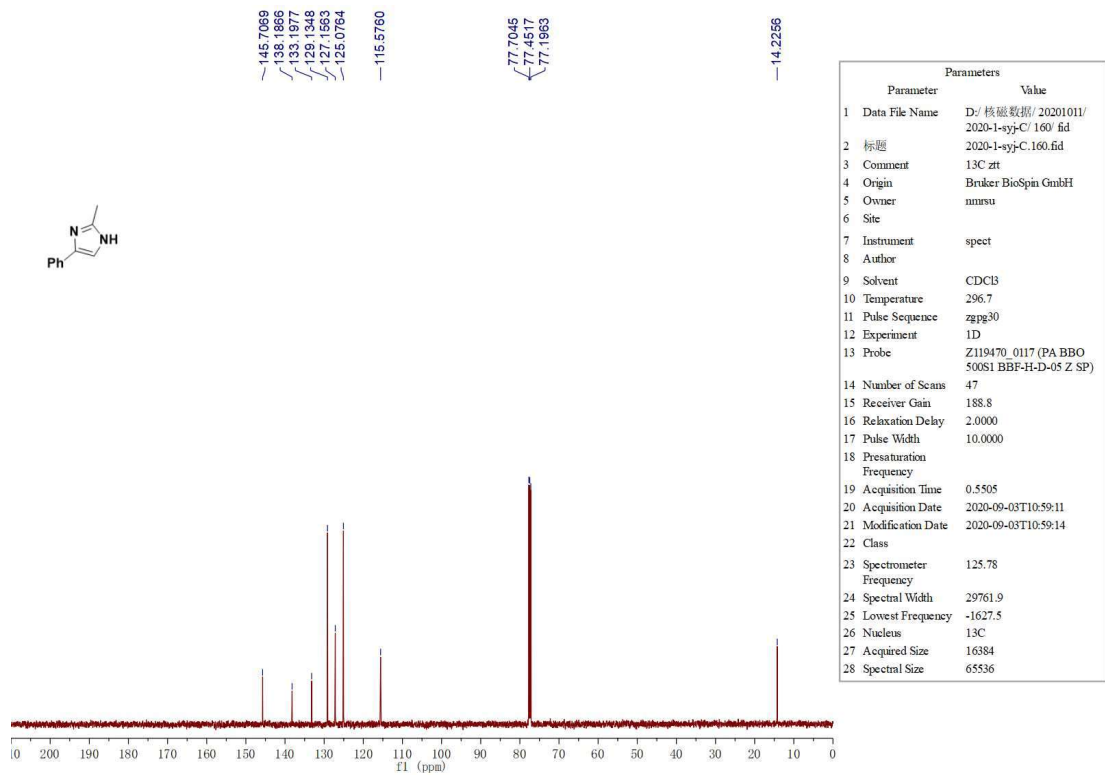

**(E)-(2,5-Diphenyl-1H-pyrrol-3-yl) (phenyl)methanone oxime (9)**

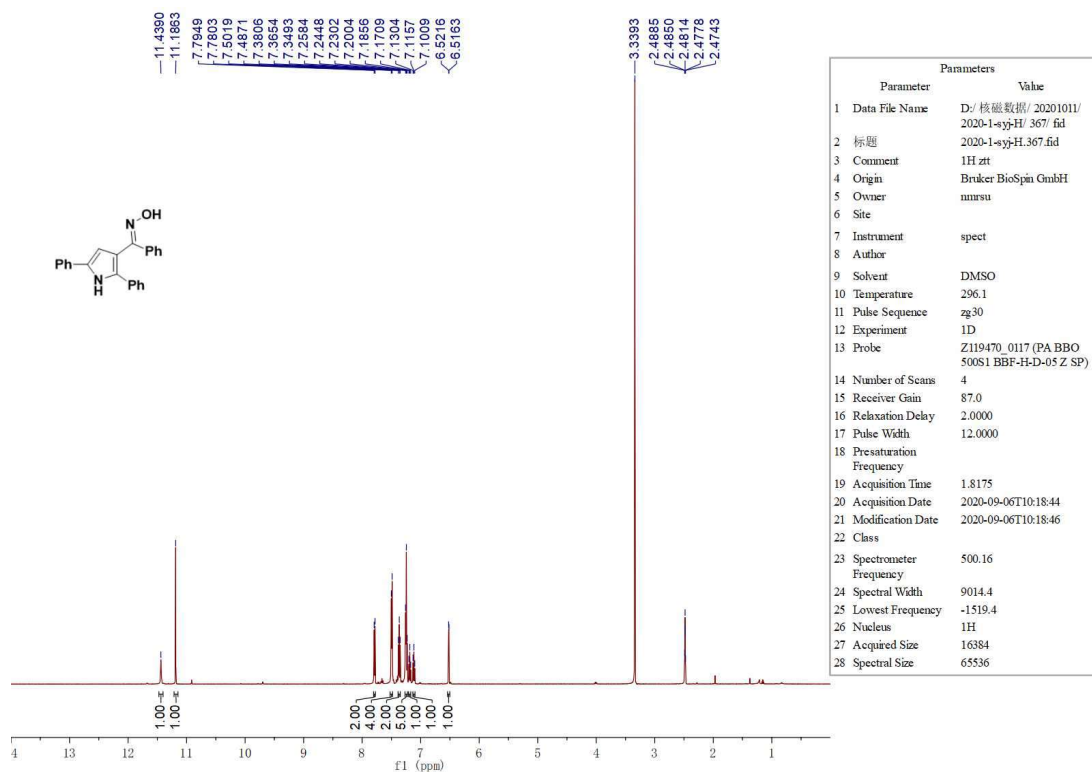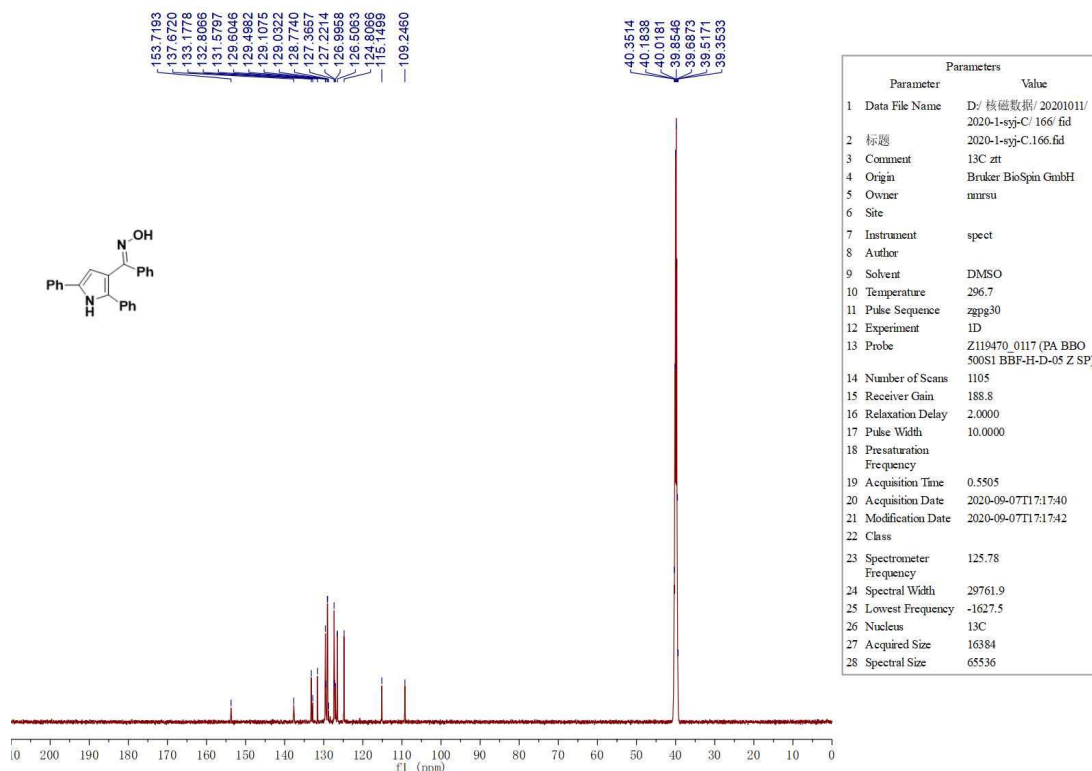

(1-Methyl-2,5-diphenyl-1*H*-pyrrol-3-yl) (phenyl)methanone (10)

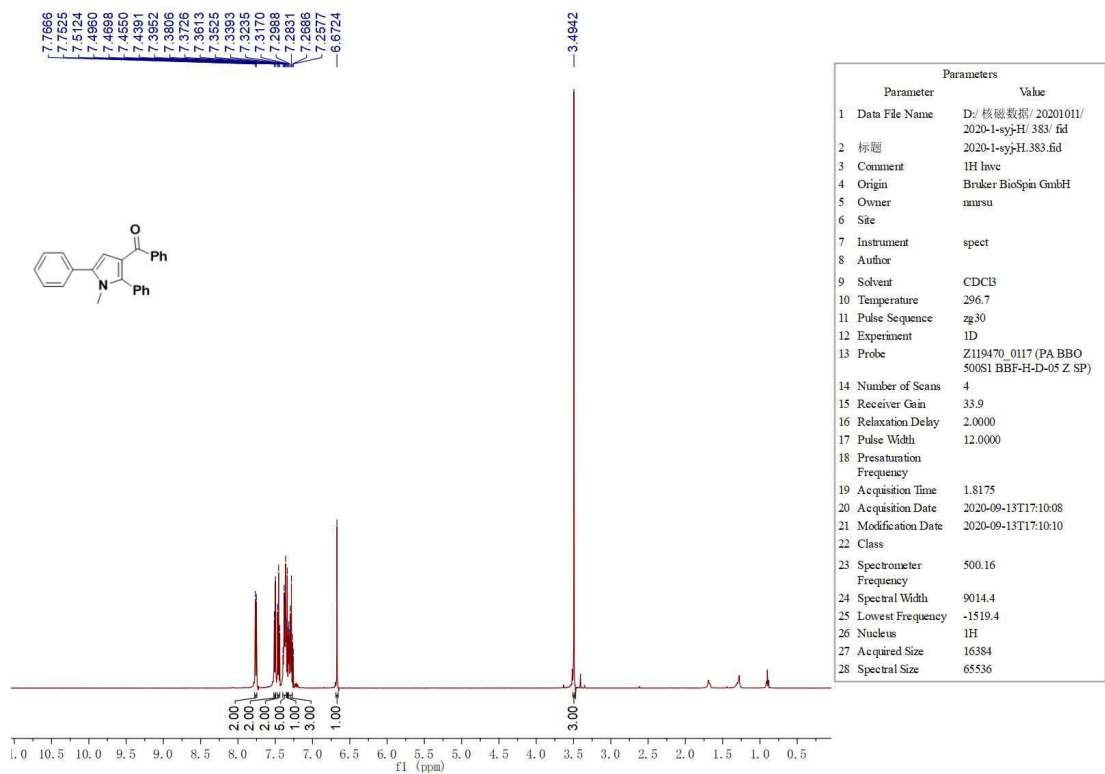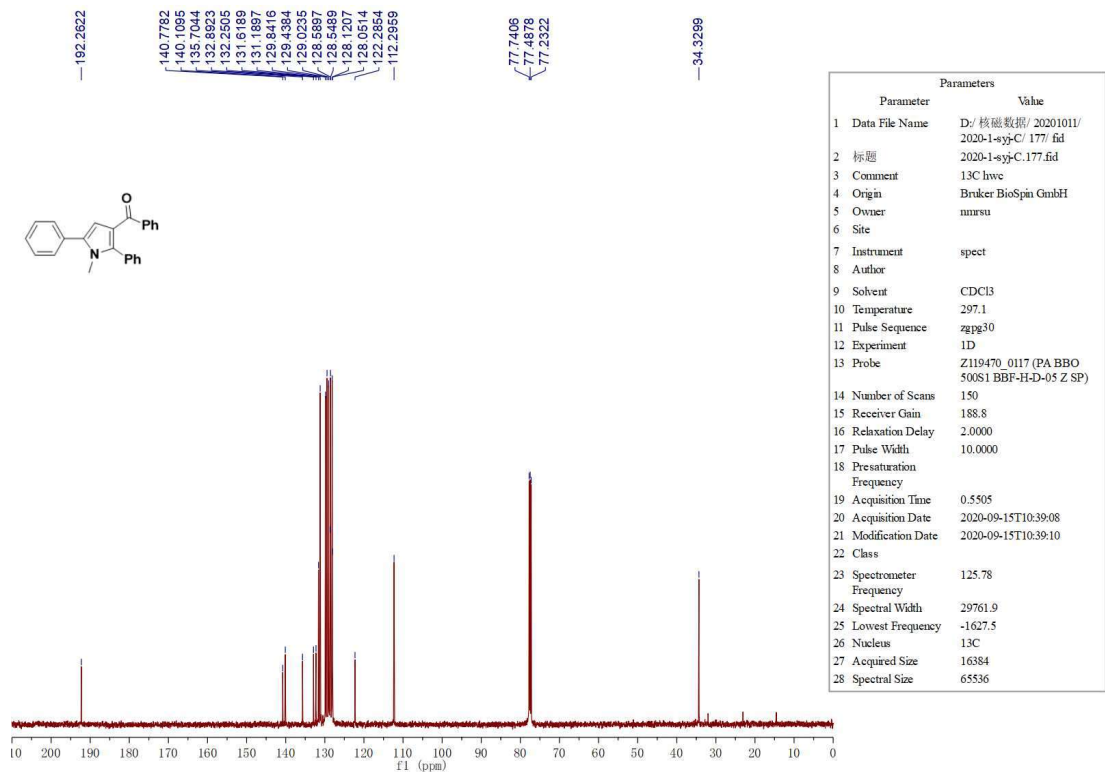

#### 4. GC-MS spectra for mechanistic investigations

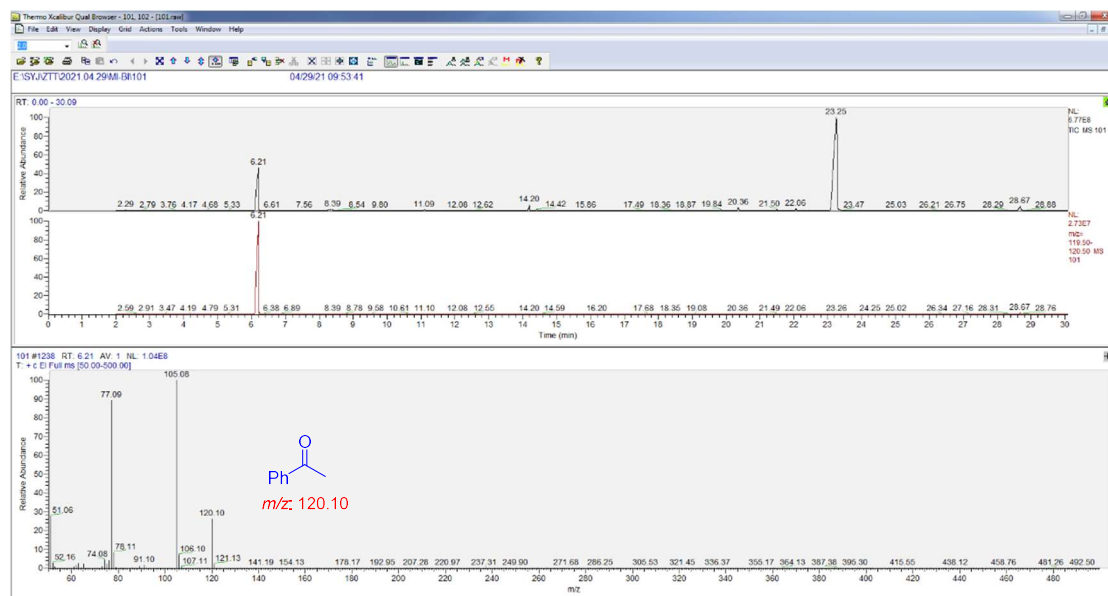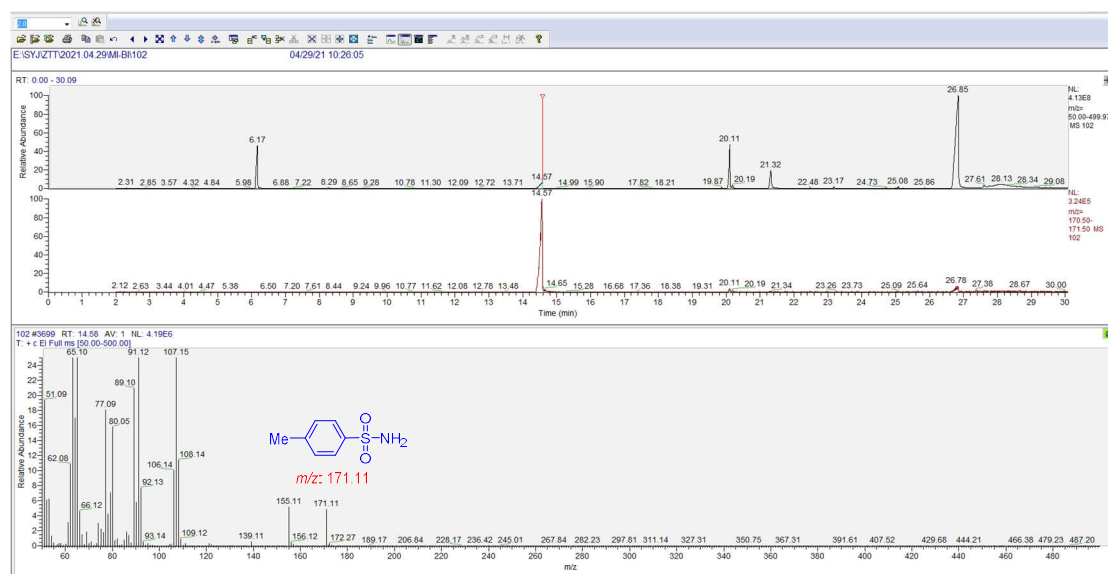

Supplement: s1 [file s1]
